# Supplementary material for: Application of composite reference intervals in the diagnosis of subclinical hypothyroidism in the elderly: a retrospective study
Source: PeerJ. 2024 Nov 1;12:e18417. doi: 10.7717/peerj.18417 (PMC11533903; doi:10.7717/peerj.18417)
Supplement: Data S1 [file peerj-12-18417-s001.xlsx]

## Sheet: data of the elderly（1322people）
age	Sex	height	weight	waistline	hipline	waist hip rate	systolic pressure （mmHg）	diastolic blood pressure（mmHg）	white blood cell count （*10^9/L）	red blood cell count （*10^12/L）	hemoglobin （g/L）	mean erythrocyte content （pg）	mean corpuscular volume （fL）	blood platelet（*10^9/L）	Alanine aminotransferase（U/L)	Aspartate aminotransferase（U/L)	albumin（g/L)	cholesterol (mmol/L)	high density lipoprotein (mmol/L)	low density lipoprotein (mmol/L)	triglyceride (mmol/L)	glucose (mmol/L)	glycosylated hemoglobin (%)	creatinine (umol/L)	urea (mmol/L)	Uric Acid (umol/L)	Estimated glomerular Filtration Rate (ml/min/1.73m^2)	Homocysteine （umol/L）	cystatin C （mg/L）	kalium （mmol/L）	sodium （mmol/L）	chlorinum （mmol/L）	Thyroid stimulating hormone ，TSH（mIU/L）	Triiodothyronine, T3(nmol/L)	Free triiodothyronine，FT3 （pmol/L)	Thyroxine, T4(nmol/L)	Free thyroxine, FT4 （pmol/L)	Antithyroglobulin antibody, TgAb (IU/ml)	Anti-thyroid peroxidase antibody, TPOAb (IU/ml)
65	male	166cm	79Kg	100cm	103cm	0.97	131mmHg	80mmHg	4.93	5.13	159	31	90.6	116	26	24	48.2	4.85	1.51	1.83	1.35	6.19	NULL	56	4.7	278	NULL	14.9	0.64	NULL	NULL	NULL	1.81	1.76	5.09	91.82	16.16	<10.00	10.94
69	male	164cm	64Kg	89cm	92cm	0.97	117mmHg	57mmHg	5.27	4.59	142	30.9	91.9	207	43	35	48.2	7.59	1.78	3.19	3.38	3.94	6.8	95	5.3	419	75.71	12.6	1.11	NULL	NULL	NULL	2.4	1.61	4.72	105	17.9	13.1	10.58
76	female	155.0cm	74.0Kg	98cm	99cm	0.99	158mmHg	80mmHg	8.78	4.5	159	35.3	103.8	214	15	19	48.1	3.53	1.34	3.07	1.56	6.46	5.4	91	6.5	416	NULL	10.2	0.88	4.4	139.8	NULL	3.14	1.5	5.18	100.6	18.12	<10.00	129.6
62	male	162.0cm	71.0Kg	90cm	96cm	0.94	136mmHg	90mmHg	4.17	4.21	126	29.9	91	154	13	15	50.1	4.18	1.59	3.77	1.36	5.48	NULL	63	4.6	351	NULL	16.1	0.68	NULL	NULL	NULL	1.5	1.69	4.8	85.15	15.44	19.75	<9.00
65	male	160cm	52Kg	79cm	87cm	0.91	112mmHg	59mmHg	6.36	5.82	165	28.4	84.4	286	30	21	53.6	6.01	0.85	2.82	1.26	5.04	NULL	74	3.3	277	102.24	10	0.82	4.03	139.1	NULL	4.81	2.13	5.39	124.2	18.1	15.9	13.34
77	male	165.0cm	76.0Kg	103cm	110cm	0.94	122mmHg	70mmHg	5.53	5.27	159	30.2	89	255	44	38	54	4.72	1.35	2.47	4.32	5.34	5.1	77	4.1	353	116.57	13.5	0.78	NULL	NULL	NULL	3.18	1.39	5.75	71.7	18	12.96	19.21
63	male	175.0cm	78.0Kg	90cm	100cm	0.90	140mmHg	85mmHg	5.73	4.58	141	30.8	94.8	290	47	39	48.3	3.65	0.94	3.92	1.34	4.97	5.6	82	8.8	302	NULL	14.2	1.02	NULL	NULL	NULL	2.03	2.13	5.55	108	15.94	18.3	<9.00
64	male	162cm	54Kg	84cm	93cm	0.90	125mmHg	63mmHg	7.96	4.71	153	32.5	97.7	262	33	18	43.7	4.84	0.85	2.85	1.74	5.09	5.2	69	4.9	332	103.69	23.1	0.76	3.95	139.2	103.4	1.95	1.4	4.17	76	14.3	<10.00	<9.00
66	female	152.0cm	60.0Kg	82cm	93cm	0.88	127mmHg	62mmHg	3.44	4.8	148	30.8	94.6	216	9	20	45.5	3.97	0.99	3.16	1.56	4.77	NULL	68	5.2	268	NULL	9	0.71	4.34	141.5	NULL	2.72	1.91	5.06	94.37	17.67	10.5	<9.00
62	male	169cm	76Kg	95cm	97cm	0.98	142mmHg	58mmHg	4.16	4.53	151	33.3	99.1	229	17	22	50.5	4.88	1.85	1.58	3.25	5.6	NULL	68	4.5	458	102.92	7.2	0.74	NULL	NULL	NULL	3.4	1.67	5.65	118.6	20.45	<10.00	9.54
62	male	157.0cm	54.0Kg	86cm	91cm	0.95	116mmHg	65mmHg	10.14	5.27	163	30.9	93.7	197	36	25	44.5	5.48	0.86	2.8	1.28	4.86	5.2	90	5.9	488	101.2	15.6	0.89	NULL	NULL	NULL	2.97	1.61	4.36	104.8	19.27	18.8	17.61
63	male	166.0cm	64.0Kg	88cm	96cm	0.92	117mmHg	72mmHg	7.65	5.16	151	29.3	88	225	40	41	49.9	5.35	0.97	4.29	1.31	4.86	NULL	77	3.5	404	114.14	8.4	0.75	NULL	NULL	NULL	1.26	2.07	5.3	101.1	17.09	14.37	>600.00
65	male	167cm	49Kg	77cm	87cm	0.89	102mmHg	60mmHg	4.7	5.42	170	31.4	92.8	239	26	20	44	3.61	0.75	1.66	4.38	4.35	4.9	55	5.1	207	117.89	16.6	0.64	NULL	NULL	104.7	2.27	1.47	4.7	86.9	15.5	10.2	<9.00
65	male	164.0cm	67.0Kg	97cm	104cm	0.93	125mmHg	77mmHg	5.62	4.4	133	30.2	91.4	193	13	17	46.6	4.55	1.66	2.57	3.11	4.71	5.7	118	3.9	516	60.33	16.3	1.24	NULL	NULL	NULL	1.59	2.66	6.11	135	19	17.65	189.5
78	male	166.0cm	63.0Kg	82cm	92cm	0.89	147mmHg	81mmHg	4.55	4.42	145	32.8	95.5	207	10	17	47	3.49	1.53	2.9	6.38	14.99	5.2	48	3.4	180	129.5	12.6	0.6	NULL	NULL	NULL	1.09	1.7	5.09	99.33	15.46	21.53	13.51
67	male	164.0cm	69.0Kg	85cm	92cm	0.92	147mmHg	85mmHg	5.97	4.87	141	29	86.9	244	12	17	49	4.34	1.22	3.4	1.33	4.96	5.7	92	5.2	402	76.52	24.8	0.89	4.15	142.1	NULL	5.04	1.39	4.67	72.73	17.58	12.1	18.16
64	male	156.0cm	72.0Kg	97cm	97cm	1.00	137mmHg	85mmHg	3.49	4.33	141	32.6	94.7	143	13	17	48.6	5.06	1.05	3.13	1.78	6.65	6	84	4.3	399	103.99	16.3	0.82	4.17	143.7	NULL	2.1	1.99	5.94	105	19.3	13.5	17.18
66	male	178.0cm	73.0Kg	76cm	96cm	0.79	116mmHg	77mmHg	6.35	5.51	159	28.9	87.8	91	66	35	48.5	3.45	0.88	2.89	1.33	5.26	5.5	44	4.5	304	NULL	18.5	0.58	3.81	142.4	NULL	1.51	2.48	5.46	143	17.57	15	<9.00
67	male	168.0cm	75.0Kg	94cm	103cm	0.91	171mmHg	93mmHg	10.63	6.54	133	20.3	66.2	169	11	17	48.9	4.73	1.15	3.42	1.7	6.2	5	80	5.6	332	NULL	12.6	0.81	NULL	NULL	104.4	2.17	1.83	5.3	87.64	14.37	17.29	>600.00
61	male	165cm	51Kg	69cm	86cm	0.80	102mmHg	59mmHg	5.2	5.12	163	31.8	92	119	21	14	44.2	5.05	1.38	1.8	1.4	4.98	NULL	76	5.6	381	NULL	16.7	0.84	4.19	145.2	105.1	1.9	1.47	5.31	84.71	16.66	15	<9.00
71	male	163.0cm	60.0Kg	81cm	94cm	0.86	108mmHg	71mmHg	5.23	4.56	140	30.7	95.8	229	13	23	43.9	4.59	2.03	1.97	3.82	4.81	5.5	76	4.4	279	114.75	12.6	0.86	NULL	NULL	NULL	1.34	1.83	5.49	109	16.8	11.9	7.76
63	male	162.0cm	70.0Kg	103cm	103cm	1.00	155mmHg	91mmHg	15.65	5.64	167	29.6	87.6	196	14	16	49.6	4.68	1.21	3.83	1.65	6.69	5.6	67	4.9	395	112.66	14.8	0.75	NULL	NULL	102.6	3.75	1.84	5.55	112.6	16.83	15.85	<9.00
64	female	152.0cm	62.0Kg	90cm	99cm	0.91	112mmHg	73mmHg	7.37	4.61	131	28.4	91.1	233	13	14	50.6	5.29	1.68	3.1	1.32	5.06	NULL	68	3.2	270	102.62	11.4	0.8	NULL	NULL	NULL	2.56	1.45	5.04	99.22	18.36	14.59	8.88
68	male	166.0cm	70.0Kg	87cm	98cm	0.89	156mmHg	88mmHg	5.34	5.63	164	29.1	88.5	229	18	17	51.6	4.58	1.18	3.52	1.32	5.24	6	75	4.3	300	82.04	NULL	0.77	NULL	NULL	NULL	3.83	1.36	3.71	90.58	15.31	761	12.39
74	female	147.0cm	54.0Kg	83cm	93cm	0.89	166mmHg	83mmHg	7.09	4.95	151	30.5	91.9	226	13	20	51.9	6.79	2.5	3.57	1.32	5.87	NULL	75	5.2	251	105.31	18.4	0.82	NULL	NULL	NULL	6.04	1.95	6.11	110.5	19.12	10.4	17.6
60	male	170.0cm	66.0Kg	89cm	98cm	0.91	128mmHg	76mmHg	5.6	5.47	158	28.9	90.1	271	8	15	46.4	3.72	1.06	2.53	1.69	7.98	5.7	56	3.7	294	96.95	13.8	0.91	4.36	140.3	NULL	4.59	1.47	4.11	106	16.2	14.4	<9.00
70	male	161.0cm	70.0Kg	94cm	97cm	0.97	177mmHg	85mmHg	5.85	4.03	124	30.8	96.5	235	26	24	44.2	4.61	1.41	3.03	1.5	5.13	5.3	82	4.6	370	103.37	17.8	0.84	NULL	NULL	NULL	1.02	1.7	5.36	102	16.8	20.76	11.87
67	female	151.0cm	50.0Kg	82cm	93cm	0.88	128mmHg	67mmHg	5.03	4.89	145	29.7	92.8	229	14	19	48.5	5.5	1.47	4.16	1.45	5.12	NULL	80	3.5	343	NULL	13	0.8	NULL	NULL	NULL	4.18	2.05	5.32	106.3	21.65	12.75	11.2
68	male	167cm	55Kg	76cm	86cm	0.88	142mmHg	78mmHg	4.78	4.16	130	31.3	96.9	129	7	12	47.3	3.15	1.25	3.01	0.35	5.56	5.8	58	6.8	238	NULL	16.1	0.83	NULL	NULL	NULL	2.28	1.48	4.38	77.79	18.1	11.2	<9.00
72	female	156.0cm	60.0Kg	92cm	90cm	1.02	136mmHg	65mmHg	2.89	4.47	147	32.9	101.3	104	17	25	53.9	4.56	2.09	2.13	1.3	5.09	5.7	44	4.8	242	126.87	13.2	0.69	NULL	NULL	NULL	3.1	1.66	4.67	87.5	14.6	112.2	205.1
74	male	163.0cm	93.0Kg	109cm	114cm	0.96	170mmHg	91mmHg	7.54	5.3	155	29.2	87.9	359	37	30	55	5.44	1.35	2.76	1.33	5.34	NULL	89	4.3	279	90.39	14	0.64	NULL	NULL	NULL	0.892	1.52	5.08	93.28	15.37	16.87	6.24
67	male	171cm	71Kg	91cm	98cm	0.93	136mmHg	84mmHg	8.05	5.67	162	28.6	88.5	273	74	32	44.4	5.29	0.74	3.51	1.33	5.26	6.1	77	4.8	279	NULL	16.4	0.86	4.31	142.8	103.5	2.31	1.88	4.65	131.1	18.41	14.7	<9.00
62	male	160cm	61Kg	81cm	95cm	0.85	121mmHg	74mmHg	6.46	5.35	163	30.5	93.5	234	16	19	49.1	4.55	1.14	3.87	1.56	5.58	NULL	62	5.5	304	118.84	14.7	0.74	NULL	NULL	NULL	3.25	1.86	5.61	85.8	14.2	12.1	7.37
66	male	162.0cm	68.0Kg	85cm	98cm	0.87	136mmHg	84mmHg	6.13	4.54	130	28.6	89.4	211	11	12	45.5	4.36	1.14	2.59	1.67	5.28	5.3	47	4.1	351	112.52	18.2	0.64	NULL	NULL	NULL	2.72	1.63	4.73	80.68	15.62	19.89	11.74
73	male	160.0cm	79.0Kg	95cm	105cm	0.90	118mmHg	80mmHg	7.02	4.82	150	31.1	96.3	327	13	20	48.1	3.4	1.16	2	1.63	5	9.1	71	2.8	351	102.54	13.5	0.88	NULL	NULL	NULL	1.57	1.77	4.85	99.46	17.4	14.61	5.31
82	male	170.0cm	66.0Kg	87cm	92cm	0.95	161mmHg	75mmHg	5.38	4.89	154	31.5	92.2	204	59	31	48.3	4.42	1.17	3.54	1.52	6.52	NULL	90	6.5	361	NULL	33.8	0.89	4.85	140.2	NULL	2.79	1.76	5.87	87.16	15.86	11.6	9.14
62	female	159.0cm	55.0Kg	73cm	92cm	0.79	125mmHg	80mmHg	4.98	4.41	133	30.2	94.1	403	44	29	43.8	6.12	1.59	3.12	1.56	4.96	NULL	54	5.5	289	102.34	10.2	0.75	NULL	NULL	NULL	5.25	2.02	5.73	87.96	15.89	11.2	16.09
65	male	164cm	66Kg	86cm	93cm	0.92	136mmHg	84mmHg	5.52	5.52	159	28.8	90.4	206	24	19	48.4	4.25	1.03	2.36	1.56	5.92	5.7	57	5.4	207	97.06	15	0.71	NULL	NULL	NULL	3.48	1.87	5.02	101.6	15.22	11.5	12.94
66	female	142cm	47.0Kg	73cm	89cm	0.82	118mmHg	66mmHg	9.75	5.11	152	29.7	89.6	212	34	24	53.7	3.76	1.03	3.21	1.67	5.14	5.4	68	4.6	350	NULL	11	1.01	NULL	NULL	NULL	2.68	1.79	5.22	92.11	16.86	12.9	<9.00
63	female	157cm	60Kg	82cm	92cm	0.89	159mmHg	89mmHg	5.99	5.88	138	23.5	74.5	283	22	20	50.8	4.38	1.16	3.54	1.26	4.96	5.4	105	6.5	579	NULL	11.6	1.01	NULL	NULL	NULL	3.86	2.62	5.94	99.04	16.09	11.9	10.48
62	male	161cm	56Kg	82cm	94cm	0.87	127mmHg	74mmHg	5.01	5.55	175	31.5	89.9	154	34	19	53	4.71	1.34	4.4	4	5.93	NULL	58	4.6	249	118.32	10.5	0.58	NULL	NULL	98	1.8	2.18	5.32	100.3	14.94	14.5	<9.00
64	male	169.0cm	56.0Kg	78cm	98cm	0.80	117mmHg	72mmHg	6.3	4.46	137	30.7	97.8	300	31	23	48.3	4.22	1.11	2.89	5.53	4.93	NULL	70	4.8	261	99.78	21.8	0.75	NULL	NULL	NULL	4.12	2.04	5.68	126.8	19.9	21.57	96.9
82	male	170cm	58Kg	82cm	92cm	0.89	117mmHg	69mmHg	6	4.61	146	31.7	96.3	182	18	24	48.5	3.6	1.29	1.41	1.32	5.22	NULL	45	2.3	246	NULL	20.8	0.55	NULL	NULL	NULL	3.18	1.61	4.57	93.85	15.99	16.4	11.91
69	male	156.0cm	65.0Kg	87cm	92cm	0.95	144mmHg	93mmHg	6.89	5.26	170	32.3	96	222	30	34	53.1	6.92	1.21	2.41	3.04	7.86	5.1	80	3.8	521	100.68	NULL	0.93	NULL	NULL	95.6	2.31	1.4	5.27	55.63	11.44	11.5	34.31
60	male	168cm	65.8Kg	81cm	92cm	0.88	141mmHg	80mmHg	6.85	5.46	164	30	89	270	28	25	48.3	4.35	1.2	2.65	0.69	9.37	5.5	70	4.3	269	NULL	13.1	0.6	NULL	NULL	NULL	3.37	1.69	4.11	106.6	14.77	24.61	11.98
78	male	162cm	55.5Kg	82cm	93cm	0.88	112mmHg	60mmHg	5.14	5.03	159	31.6	95.6	208	40	30	52.5	5.11	1.89	1.82	0.92	6.04	5.2	75	5.1	306	84.38	NULL	0.66	NULL	NULL	NULL	1.98	1.65	4.72	106.8	15.81	10.6	21.05
81	male	157cm	66.1Kg	89cm	97cm	0.92	139mmHg	65mmHg	7.1	4.65	143	30.8	93.3	191	185	127	45.2	4.72	1.47	4.36	0.99	5.44	5.2	62	4.6	234	108.47	23.6	0.71	NULL	NULL	NULL	8.42	2.05	5.24	107.1	15.33	<10.00	47.99
82	male	168cm	68Kg	92cm	96cm	0.96	147mmHg	79mmHg	3.99	4	123	30.8	94.8	159	12	21	47.9	4.33	1.64	4.03	1.33	5.06	NULL	72	3.7	426	NULL	15.4	0.69	4.28	140.5	NULL	3.35	1.84	5.44	116	18.43	16	14.07
68	female	143.0cm	40.0Kg	71cm	90cm	0.79	147mmHg	81mmHg	7.53	5.05	149	29.5	88.9	210	18	16	52.1	4.56	1.45	NULL	1.27	NULL	NULL	62	7.3	321	NULL	14.5	0.85	NULL	NULL	NULL	4.55	1.93	5.15	93.94	15.22	12.6	12.16
63	male	162.0cm	69.0Kg	92cm	97cm	0.95	116mmHg	70mmHg	7.86	5.23	133	25.4	82.2	369	8	20	48.9	4.39	0.72	3.31	1.33	4.59	4.8	90	3.9	467	91.07	12.7	0.77	NULL	NULL	NULL	0.873	1.76	5.45	106	17.7	62.53	9.15
66	female	149.0cm	56.0Kg	77cm	92cm	0.84	143mmHg	74mmHg	8.25	6.47	145	22.4	73.9	405	24	23	51.3	6.09	1.3	3.44	1.47	6	5.9	97	3.6	356	84.37	13.5	0.95	NULL	NULL	103.2	1.63	1.5	4.7	78.43	19.43	16.16	14.2
70	male	168.0cm	65.0Kg	84cm	100cm	0.84	141mmHg	78mmHg	4.32	4.2	123	29.3	86.7	292	15	21	43.3	4.22	1.61	4.47	1.77	6.11	5.6	92	3.6	426	97.17	12.1	0.95	NULL	NULL	NULL	2.65	2.2	5.85	119.5	18.5	14.4	<9.00
67	female	149.0cm	51.0Kg	75cm	94cm	0.80	167mmHg	90mmHg	6.23	5.51	164	29.8	86.9	153	15	20	46	6.62	1	4.12	1.57	5.28	5.3	105	6.1	292	82.82	16.3	0.88	NULL	NULL	NULL	3.83	1.47	4.99	91.4	21	14.38	6.56
61	female	156.0cm	47.0Kg	73cm	90cm	0.81	131mmHg	70mmHg	4.36	5.15	172	33.4	101.7	203	18	18	48.9	5.31	0.95	2.24	3.02	5.17	5.3	68	5	384	126.18	8.1	0.71	NULL	NULL	102.1	2.86	2.07	5.53	114.2	17.38	12.79	<9.00
67	male	158.0cm	62.0Kg	89cm	92cm	0.97	121mmHg	72mmHg	5.81	4.07	133	32.7	99.8	203	12	19	44.7	5.42	1.77	2.6	1.27	5.02	NULL	89	4.3	342	89.76	15	0.91	NULL	NULL	NULL	1.79	0.91	3.42	67.9	14.4	18.91	7.84
66	female	150.0cm	46.0Kg	71cm	86cm	0.83	147mmHg	83mmHg	4.77	5.34	163	30.5	91	276	39	27	49.7	5.66	1.17	2.68	1.48	5.64	5.4	58	4.4	446	NULL	NULL	0.92	NULL	NULL	NULL	3.34	2.09	5.79	111.9	17.84	11.05	12.24
61	female	161.0cm	68.0Kg	86cm	101cm	0.85	122mmHg	64mmHg	5.55	5.35	171	32	93.1	251	30	20	45.1	5.11	0.98	3.81	1.56	5.43	5.9	81	6.4	499	NULL	11.8	0.71	NULL	NULL	NULL	2.13	1.78	5.67	96.37	17.83	12.6	<9.00
63	male	162cm	64Kg	90cm	96cm	0.94	129mmHg	85mmHg	12.01	4.57	143	31.3	94.1	146	38	32	50	5.09	1.02	2.93	1.33	8.86	NULL	55	6.3	266	NULL	19	0.76	3.6	139.2	99.7	1.81	1.44	4.61	87.1	15.24	14.5	<9.00
64	male	172.0cm	61.0Kg	78cm	87cm	0.90	104mmHg	68mmHg	4.99	4.08	130	31.9	97.8	135	38	39	47.9	6.79	2.04	3.53	3.16	5.1	5.6	77	4.1	215	98.48	NULL	0.86	NULL	NULL	NULL	1.92	1.64	5.31	104.2	18.15	13.8	10.17
60	male	155.0cm	56.0Kg	85cm	93cm	0.91	118mmHg	73mmHg	11.27	5.13	164	32	95.9	251	29	21	50.1	4.58	0.89	2.31	1.67	6.07	5.9	96	5.6	354	81.9	16.2	0.71	NULL	NULL	NULL	1.32	2.24	6.67	88.88	17.76	13.62	<9.00
78	male	185.0cm	89.0Kg	96cm	101cm	0.95	117mmHg	72mmHg	6.48	4.35	151	34.7	103.4	116	28	24	49.9	5.36	1.02	3.52	1.33	7.38	NULL	71	6.1	469	NULL	20.5	0.85	4.17	140.2	NULL	1.17	1.26	4.94	71.42	20.85	14.3	10.97
79	male	161.0cm	74.0Kg	98cm	102cm	0.96	143mmHg	76mmHg	6.56	4.14	126	30.4	95.4	259	15	18	42.8	5.11	1.08	1.74	1.41	6.42	6.4	167	6	475	32.34	18.5	1.95	4.15	141	104.8	4.62	1.66	4.41	109	17.3	<10.00	<9.00
66	male	170cm	75Kg	89cm	97cm	0.92	115mmHg	59mmHg	9	6.53	127	19.4	64.3	252	14	17	48.5	4.65	1.48	1.73	6.44	5.06	5.6	55	3	221	112.3	17.3	0.86	NULL	NULL	NULL	4.29	1.57	4.94	60.2	12.8	12.3	9.06
65	female	157.0cm	72.0Kg	97cm	107cm	0.91	137mmHg	74mmHg	7.55	4.24	118	27.8	89.6	193	17	20	43.6	3.72	1.29	1.94	1.36	8.15	5.8	85	4.8	404	93.56	8.8	0.85	NULL	NULL	104.9	1.28	1.77	4.56	93.3	14.3	10.8	51.8
75	male	159cm	58Kg	84cm	88cm	0.95	161mmHg	77mmHg	8.58	4.37	133	30.4	99.8	228	15	19	45.9	4.89	1.75	3.36	1.32	10.09	NULL	109	4.1	404	58.52	NULL	1.4	NULL	NULL	NULL	0.895	1.66	4.33	104.5	15.24	13.2	16.81
78	female	154.0cm	46.0Kg	72cm	89cm	0.81	140mmHg	57mmHg	6.4	4.27	132	30.9	94.8	313	10	15	45.2	4.16	1.42	4.66	0.31	5.92	5.3	66	4	287	104.17	13	0.75	NULL	NULL	NULL	1.76	1.55	4.55	92.9	16.2	11.3	<9.00
63	male	166.0cm	65.0Kg	85cm	94cm	0.90	118mmHg	78mmHg	4.82	6.13	196	32	93.6	128	37	23	42.8	3.63	1.38	3.03	1.28	5.84	5.6	63	5	259	NULL	NULL	0.9	NULL	NULL	NULL	5.26	2.42	5.51	115.3	17.29	16.56	23.85
70	female	152.0cm	40.0Kg	70cm	80cm	0.87	135mmHg	78mmHg	8.07	4.89	159	32.5	95.3	199	20	17	50.3	5.15	1.16	3.43	1.42	4.29	5.3	81	4.3	333	111.76	19.5	0.71	NULL	NULL	NULL	2.75	1.63	5.58	89.1	18.8	15	<9.00
64	male	170.0cm	68.0Kg	90cm	94cm	0.96	141mmHg	97mmHg	6.28	4.28	131	30.6	94.9	198	32	24	44.4	4.18	1.16	2.56	3.56	5.34	5.4	63	4.5	241	110.97	13.2	0.66	4.44	141.2	NULL	1.34	1.62	5.14	76.9	13.3	11.3	8.28
68	male	162.0cm	66.0Kg	85cm	96cm	0.89	126mmHg	69mmHg	8.32	5.57	176	31.6	94.6	179	44	34	52.3	5.74	1.33	2.21	1.28	5.84	7.3	68	4.8	208	NULL	8.8	0.77	NULL	NULL	NULL	1.47	2.08	5.98	120.3	20.2	16.18	13.65
70	male	152cm	61Kg	92cm	99cm	0.93	157mmHg	91mmHg	5.21	4.93	155	31.4	94.7	316	36	24	52.6	4.44	1.01	3.37	3.62	4.95	NULL	101	5.6	341	82.06	33.7	0.81	NULL	NULL	102.1	3	1.58	7.14	98.08	22.33	10.8	15.25
64	male	158cm	66Kg	85cm	89cm	0.96	129mmHg	78mmHg	5.06	4.96	164	33.1	99.4	227	11	20	49.4	7.06	1.42	2.84	1.52	4.91	NULL	82	4.4	546	111.67	14.7	0.94	NULL	NULL	NULL	1.51	1.61	4.38	96.04	19.88	91.9	11.1
67	male	160cm	66Kg	89cm	96cm	0.93	106mmHg	65mmHg	6.64	4.27	132	30.9	96	176	18	15	47.8	4.36	1.74	3.21	3.25	5.22	5.5	61	3.4	321	112.35	NULL	0.74	NULL	NULL	NULL	2.32	2.18	5.65	105	14.7	12.2	6.47
67	male	158.0cm	58.0Kg	78cm	85cm	0.92	117mmHg	89mmHg	5.81	5.3	163	30.8	92.5	178	22	20	47.6	4.92	1.52	2.58	1.58	5.73	6.5	96	6.1	411	NULL	10.4	0.92	NULL	NULL	NULL	1.14	1.54	4.71	77.64	16.73	11	<9.00
65	male	164.0cm	65.0Kg	88cm	98cm	0.90	143mmHg	85mmHg	4.85	4.64	146	31.5	97	212	22	24	46.1	3.98	1.55	3.21	4.08	4.87	6	74	4	431	92.64	11.8	0.74	NULL	NULL	103.2	2.02	1.97	4.75	107	14.8	13.47	12.93
63	female	156.0cm	52.0Kg	75cm	91cm	0.82	132mmHg	75mmHg	5.45	4.37	139	31.8	94.1	243	9	17	46.1	5.27	1.44	3.22	1.69	5.38	5	46	4.7	299	NULL	12.1	0.75	NULL	NULL	NULL	4.24	2.48	7.28	161.2	23.72	30.55	10.82
66	male	166.0cm	67.0Kg	94cm	96cm	0.98	120mmHg	83mmHg	5.74	4.38	130	29.7	87.2	142	18	20	46.6	3.21	1.5	3.64	1.28	5.21	4.7	65	8	306	NULL	10	0.8	4.16	139.1	NULL	2.49	1.66	4.82	85.02	14.93	10.3	80.08
67	male	159cm	67Kg	94cm	104cm	0.90	138mmHg	81mmHg	7.66	5.41	167	30.9	94.8	156	57	34	49.8	5.01	0.89	3.53	0.85	5.57	NULL	56	5	258	NULL	16	0.59	NULL	NULL	NULL	1.38	1.73	4.41	113.9	15.83	<10.00	18.16
67	female	157.0cm	54.0Kg	79cm	90cm	0.88	131mmHg	75mmHg	6.49	4.22	119	28.2	91.2	251	6	14	46.5	5.26	1.74	3.53	1.37	5.32	5.4	54	2.6	301	NULL	10.9	0.66	4.35	140	NULL	4.56	1.73	4.86	88.61	14.06	10.7	<9.00
64	male	164cm	67Kg	84cm	95cm	0.88	154mmHg	95mmHg	5.01	5.13	166	32.4	97.1	150	38	29	48.7	5.59	0.98	2.05	1.75	5.87	7.9	81	4.1	329	NULL	15.8	0.85	NULL	NULL	NULL	2.74	1.71	5.47	80.18	17.36	13.9	<9.00
60	male	165.0cm	63.0Kg	78cm	93cm	0.84	126mmHg	80mmHg	5.52	5.26	162	30.8	93.9	220	27	16	49	4.55	0.97	2.49	1.73	5.29	4.9	64	4.5	350	125.77	14	0.65	NULL	NULL	NULL	1.27	1.5	4.7	84.03	15.43	18.03	<9.00
65	female	149cm	57Kg	80cm	88cm	0.91	123mmHg	71mmHg	6.22	4.41	137	31.1	98.2	217	11	14	45.9	5.35	1.53	3.45	1.27	6.4	5.3	94	4.1	360	82.26	10.4	0.84	NULL	NULL	NULL	1.12	1.58	5.12	110.2	20.29	17.2	20.18
67	male	168.0cm	69.0Kg	89cm	95cm	0.94	145mmHg	76mmHg	8.74	5.48	175	31.9	91.8	294	13	21	50.8	4.93	1.76	1.77	1.3	8.28	5.3	96	4.1	406	79.08	NULL	0.79	NULL	NULL	NULL	1.51	1.95	5.63	96.2	15.4	12.15	8.34
65	female	152.0cm	52.0Kg	82cm	94cm	0.87	153mmHg	94mmHg	6.2	5.57	164	29.4	91.2	145	20	22	51.3	3.26	0.97	2.75	1.5	5.92	5.8	72	5.3	496	119.83	11.1	0.82	NULL	NULL	NULL	1.31	2.3	6.93	109.4	17.97	12.6	<9.00
77	male	154cm	56Kg	82cm	91cm	0.90	135mmHg	64mmHg	6.91	4.76	141	29.6	94.5	265	19	19	46.3	5.18	1.49	3.35	0.97	5.8	5.2	56	3.8	217	106.97	NULL	0.57	NULL	NULL	NULL	2.59	1.56	4.13	108.4	16.79	25.28	5.98
62	male	156.0cm	46.0Kg	72cm	85cm	0.85	118mmHg	74mmHg	5.63	5.2	151	29	90.8	270	25	18	47.7	3.53	1.61	2.43	2.11	5.21	5.3	91	7.2	395	NULL	11.8	0.79	NULL	NULL	NULL	1.06	1.5	4.92	65.66	11.3	<10.00	<9.00
62	male	NULL	NULL	NULL	NULL	NULL	NULL	NULL	4.76	4.9	146	29.8	91.8	187	21	17	50.7	3.71	2.09	2.12	0.66	7.08	6.6	66	5	302	NULL	NULL	0.8	NULL	NULL	NULL	1.76	2	5.66	98.2	15.2	<10.00	12.18
61	male	161.0cm	69.0Kg	87cm	96cm	0.91	144mmHg	86mmHg	5.38	4.01	125	31.2	95.3	203	11	17	48.3	4.09	2	3.68	1.02	6.15	5.1	58	4.4	319	NULL	NULL	0.8	4.52	140.5	103.9	3.89	1.74	4.87	79.67	15.37	11.55	<5.00
60	male	159.0cm	59.0Kg	85cm	94cm	0.90	164mmHg	84mmHg	5.39	4.57	131	28.7	91.9	165	14	16	49.8	5.23	2.02	2.46	0.72	5.62	5.6	53	3.2	337	NULL	NULL	0.68	NULL	NULL	NULL	3.36	1.99	4.89	96.83	17.09	NULL	6.35
71	male	164.0cm	45.0Kg	71cm	87cm	0.82	128mmHg	79mmHg	5.23	4.21	137	32.5	99.3	261	17	18	46.4	4.26	1.78	2.84	1.78	7.24	5.7	98	3.8	546	89.39	17	0.88	NULL	NULL	NULL	1.08	2.29	6	110.2	17	<10.00	<9.00
65	female	146.0cm	66.0Kg	94cm	96cm	0.98	147mmHg	94mmHg	4.84	4.66	148	31.8	99.8	307	19	25	48.6	6.69	2.13	2.94	3.21	4.87	6	87	6.9	401	84.2	9.7	0.91	4	141.8	NULL	3.88	2.13	5.73	114	19	14	9.42
75	female	148cm	46Kg	73cm	89cm	0.82	136mmHg	78mmHg	5.65	5.35	166	31	93.1	263	36	20	47	5	1.19	3.72	1.33	5.04	5.5	49	2.5	365	NULL	14.2	0.65	4.26	142.8	NULL	0.537	1.5	5.04	87.64	15.53	13.1	<5.00
67	male	172cm	77Kg	95cm	100cm	0.95	135mmHg	83mmHg	5.46	3.88	116	29.9	92.3	177	10	16	46.8	4.39	1.72	2.9	1.78	6.44	5.7	77	5.1	386	107.15	17.7	0.79	4.48	144.5	NULL	1.8	2.23	5.85	97.89	16.8	14.1	19.63
70	male	159.0cm	70.0Kg	98cm	104cm	0.94	153mmHg	95mmHg	4.63	4.21	131	31.1	94.1	127	7	16	43.3	4	1.18	2.84	3.18	7.25	6.1	88	3.1	406	83.63	14.7	0.98	5.05	142.2	102.9	2.13	1.73	5.25	84.4	14.9	17.99	<9.00
72	female	146.0cm	54.0Kg	79cm	89cm	0.89	149mmHg	65mmHg	6.83	4.12	135	32.8	96.6	259	16	25	49.7	4.82	1.73	1.57	1.62	7.03	5.4	53	6.5	217	NULL	17.1	0.88	NULL	NULL	NULL	2.8	1.91	5.76	95.82	17.11	14.07	9.16
69	male	178.0cm	78.0Kg	90cm	98cm	0.92	132mmHg	76mmHg	4.07	5.59	166	29.7	90.5	180	27	19	49	4.82	1.12	3.69	1.53	5.43	6	66	7.9	398	NULL	14.4	0.7	3.8	139.9	NULL	2.04	1.69	4.67	90.39	13.88	11.2	16.7
77	male	166cm	73Kg	98cm	100cm	0.98	161mmHg	74mmHg	7.51	4.94	153	31	96	362	21	21	51.9	4.34	1.39	2.02	3.05	5.62	5.4	96	5.7	511	90.37	13	0.9	NULL	NULL	103.9	3.2	1.86	5.67	103	16.5	12.8	39.52
71	male	171cm	95Kg	107cm	106cm	1.01	118mmHg	71mmHg	8.52	4.7	134	28.5	87	362	9	16	49.3	3.88	1	2.22	1.5	5.09	NULL	54	5.6	236	NULL	17.1	0.66	3.96	140.1	NULL	5.06	1.84	5.61	90.69	13.44	12.8	17.92
68	male	168.0cm	68.0Kg	85cm	93cm	0.91	118mmHg	78mmHg	4.61	4.64	151	32.5	91.2	175	23	19	47	4.02	0.69	3.6	1.98	6.76	NULL	95	5.6	498	NULL	13.6	0.94	4.3	139.8	NULL	2.77	1.91	4.78	105.5	17.14	14	45.21
60	male	169.0cm	75.0Kg	101cm	104cm	0.97	140mmHg	81mmHg	6.82	5.17	146	28.2	91.1	214	19	23	48.3	4.59	1.23	3.21	3.05	6.14	5.8	93	4.5	407	67.98	13.4	1.06	NULL	NULL	NULL	2.46	2.15	6.1	87.2	14.1	<10.00	<9.00
68	male	180.0cm	62.0Kg	79cm	94cm	0.84	115mmHg	68mmHg	4.83	4.51	130	28.8	90	150	24	31	42.6	3.18	0.85	3.39	1.6	4.99	NULL	80	5.4	368	NULL	16.3	0.83	NULL	NULL	NULL	2.29	1.5	4.92	96.7	19.58	10.3	<9.00
82	female	139cm	39Kg	75cm	86cm	0.87	140mmHg	59mmHg	4.5	4.94	151	30.6	89.5	115	15	17	46.9	5.9	1.44	1.63	1.25	8.98	5.5	51	6.7	354	NULL	16.9	0.63	NULL	NULL	NULL	3.04	1.4	4.92	65.82	19.31	68.4	47.7
77	male	171.0cm	67.0Kg	87cm	102cm	0.85	127mmHg	76mmHg	4.86	4.06	125	30.8	92.4	170	11	16	49.3	5	1.7	3.57	1.76	7.65	5.4	86	5.1	460	98.96	11.7	0.76	NULL	NULL	NULL	2.62	1.33	4.77	98.25	18.19	13.45	<9.00
77	male	164.0cm	60.0Kg	82cm	96cm	0.85	128mmHg	72mmHg	4.02	4.24	127	30	94.8	138	24	25	46.3	4.14	1.37	2.19	4.43	5.4	NULL	77	4.6	351	118.22	NULL	0.73	NULL	NULL	104.9	2.18	1.32	5.29	99.12	20.93	14.7	<9.00
68	male	163.0cm	75.0Kg	94cm	104cm	0.90	139mmHg	78mmHg	5.86	4.5	140	31.1	95.8	236	17	16	45.6	5.08	1.53	1.44	3.86	6	5.4	92	5.5	429	95.14	12.9	0.8	NULL	NULL	NULL	1.38	1.99	5.77	133	23.1	12.7	20.1
70	female	149.0cm	42.0Kg	71cm	86cm	0.83	133mmHg	77mmHg	5.48	4.53	138	30.5	92.9	179	12	17	51.2	4.04	1.96	2.38	1.33	4.77	5.4	71	5.1	507	112.35	13.9	0.84	NULL	NULL	NULL	1.52	2.04	5.76	96.6	17.8	20.32	11.02
65	male	169.0cm	73.0Kg	86cm	97cm	0.89	118mmHg	66mmHg	6.67	4.31	137	31.8	94.2	224	28	28	49.3	4.61	1.24	3.37	1.3	4.83	5	48	3.8	344	NULL	13.4	0.69	NULL	NULL	NULL	4.79	1.91	5.49	92.88	16.43	12.1	12.82
60	male	163.0cm	72.0Kg	84cm	95cm	0.88	177mmHg	116mmHg	6.92	4.72	152	32.2	93.4	206	23	22	45.3	3.23	0.96	3.13	1.58	5.73	5.2	64	4.6	316	NULL	19.1	0.79	NULL	NULL	NULL	3.64	1.76	4.47	111.6	16.44	<10.00	25.4
60	male	173.0cm	63.0Kg	83cm	99cm	0.84	149mmHg	86mmHg	5.07	4.9	151	30.8	91	219	21	22	51	4.35	1.23	2.55	1.31	4.68	NULL	51	2.6	301	NULL	17.8	0.71	NULL	NULL	NULL	2.68	2.05	4.81	131.4	19.35	18.53	9.65
67	male	170cm	70.0Kg	95cm	101cm	0.94	123mmHg	80mmHg	7.48	5.18	151	29.2	93.4	151	27	21	51.5	4.16	0.99	3.73	1.27	7.99	5.4	68	5.6	273	91.71	10.3	0.85	NULL	NULL	NULL	1.8	1.43	4.29	91.54	16.31	15.9	16.64
78	female	154.0cm	50.0Kg	77cm	86cm	0.90	140mmHg	68mmHg	5.67	5.2	137	26.3	82.5	311	17	21	49.9	4.06	1.61	3.42	1.34	8.36	5.1	68	3	451	105.11	19.7	0.77	4.85	139.7	NULL	1.59	1.86	5.38	90.8	16	<10.00	26.03
61	male	159cm	62Kg	85cm	96cm	0.89	96mmHg	69mmHg	6.75	4.45	116	26.1	84.7	120	25	32	52.6	5.04	1.34	3.3	1.27	4.68	5.7	96	6.6	369	81.33	12.1	1	4.38	140.1	NULL	1.09	1.71	4.89	96.7	17.2	12.2	26.77
80	female	161.0cm	71.0Kg	97cm	96cm	1.01	159mmHg	83mmHg	5.67	4.74	158	33.3	96	121	45	40	48.3	4.44	0.94	1.16	1.6	5.78	NULL	69	7.5	463	NULL	15.9	0.95	NULL	NULL	NULL	2.36	2.22	6	97.28	17.5	10.8	24.12
62	male	167.0cm	68.0Kg	89cm	95cm	0.94	157mmHg	86mmHg	5.83	5.22	166	31.8	91	176	18	20	49.8	5.96	1.16	2.28	1.42	5.89	NULL	43	6.6	188	NULL	15.7	0.79	NULL	NULL	NULL	3.78	1.71	4.79	105.9	18	13.27	19.31
68	female	164.0cm	84.0Kg	103cm	107cm	0.96	132mmHg	74mmHg	5.22	4.99	156	31.3	95.4	392	16	21	50.2	4.77	1.37	1.36	1.73	5.17	NULL	115	5.4	295	NULL	NULL	1.21	NULL	NULL	NULL	2.71	1.48	4.22	87.34	15.45	<10.00	<9.00
60	male	172.0cm	88.0Kg	105cm	106cm	0.99	155mmHg	84mmHg	6.34	5.25	161	30.7	89.1	187	24	23	47.2	5.73	1.19	1.68	2.83	5.49	8.4	97	4.8	615	74.87	9.8	0.93	NULL	NULL	103	1.58	1.34	4.78	85.15	16.43	17.96	<9.00
64	female	160.0cm	54.0Kg	76cm	91cm	0.84	108mmHg	64mmHg	6.27	5.62	162	28.8	90	209	84	43	43.8	5.44	0.99	1.91	3.77	9.95	5.5	52	4	224	113.52	7.6	0.58	NULL	NULL	NULL	2.48	1.23	3.93	62.85	12.15	10.4	<9.00
77	female	150.0cm	57.0Kg	92cm	106cm	0.87	131mmHg	70mmHg	5.7	4.26	130	30.5	96.7	264	7	14	46.2	5.62	2.11	2.01	1.61	4.8	NULL	64	4	313	NULL	16.8	0.71	NULL	NULL	NULL	4.75	1.53	5.13	95.65	16.1	16.97	16.42
61	male	163cm	69Kg	91cm	97cm	0.94	129mmHg	86mmHg	4.51	4.46	117	26.2	82.3	162	10	16	48	2.66	0.96	3.21	1.28	5.13	NULL	79	4.7	364	108.28	21.5	0.79	NULL	NULL	NULL	3.76	1.82	6.47	101.5	19.25	11.7	<5.00
69	female	157.0cm	59.0Kg	80cm	93cm	0.86	137mmHg	75mmHg	4.46	3.94	119	30.2	93.9	106	52	37	48.2	5.65	1.75	2.76	1.36	5.81	NULL	77	5.2	385	NULL	11.1	0.72	NULL	NULL	102.3	0.71	1.81	5.31	80.6	15.93	12.69	<9.00
69	female	159.0cm	50.0Kg	73cm	88cm	0.83	122mmHg	65mmHg	5.34	4.67	163	34.9	105.1	116	39	50	47.9	5.09	0.93	2.59	4.79	6.27	5	55	4.4	230	114.62	13.9	0.74	NULL	NULL	99.5	2.74	1.39	4.75	73.6	14.49	12	<9.00
64	female	157cm	43.0Kg	68cm	86cm	0.79	147mmHg	64mmHg	5.52	4.91	152	31	88.2	214	17	17	45.8	3.57	1.28	3.33	1.27	5.18	5.5	83	6.7	301	94.95	13.5	0.81	NULL	NULL	NULL	1.21	1.91	5.83	55.15	10.78	14.2	13.4
73	female	149.0cm	52.0Kg	78cm	91cm	0.86	143mmHg	73mmHg	4.96	4.68	148	31.6	91.7	143	21	20	47.8	4.33	0.93	4.71	1.94	8.63	8.6	94	6.1	389	75.61	9.4	0.8	NULL	NULL	NULL	3.62	1.88	5.2	108	18.63	15.8	11.73
66	female	157cm	71Kg	89cm	107cm	0.83	143mmHg	75mmHg	6.11	5.48	163	29.7	88.1	217	22	15	51.4	4.52	1.28	3.55	1.27	5.55	6.3	89	4.9	348	86.66	11.6	0.82	NULL	NULL	NULL	1.02	1.59	5.16	100.2	17.5	13.1	7.68
71	female	162.0cm	64.0Kg	88cm	101cm	0.87	134mmHg	72mmHg	5.98	4.96	155	31.3	94.8	351	20	19	51.6	4.68	1.02	2.88	2.94	8.18	5.7	67	5.2	284	110.31	12.1	0.83	NULL	NULL	95.4	0.721	2.18	6.81	116.2	18.93	16.67	13.43
69	female	141.0cm	42.0Kg	74cm	87cm	0.85	141mmHg	69mmHg	4.46	4.53	139	30.7	95.1	210	15	21	48.9	6.77	1.69	4.18	11.82	4.91	5.2	91	4.3	395	95.06	15	0.82	NULL	NULL	103.4	1.58	1.82	5.69	82.4	15.5	13.49	<9.00
63	male	167.0cm	74.0Kg	95cm	101cm	0.94	136mmHg	78mmHg	6.79	4.5	145	32.2	96	276	14	17	45.9	4.97	0.88	2.37	1.59	7	5.5	87	6.8	366	81.87	NULL	0.92	NULL	NULL	NULL	4.69	1.5	4.96	78.1	16.5	15.69	16.22
61	female	157.0cm	69.0Kg	93cm	104cm	0.89	149mmHg	93mmHg	3.85	5.04	105	20.8	69.6	200	12	22	45.8	4.12	1.49	2.56	1.74	4.72	6.4	64	3.1	426	118.9	13.6	0.77	NULL	NULL	NULL	1.93	1.66	6.13	74.29	16.03	15.49	331
90	male	165.0cm	52.0Kg	83cm	93cm	0.89	165mmHg	83mmHg	5.38	4.96	150	30.2	90.7	258	17	22	46.5	6.46	1.09	2.72	1.52	5.53	NULL	62	7.3	251	NULL	36.5	0.73	4.18	140.5	NULL	2.48	1.7	5.14	110.5	18.22	10.9	9.64
83	male	168.0cm	58.0Kg	76cm	90cm	0.84	158mmHg	67mmHg	5.96	4.58	147	32.1	95.2	360	20	33	42.8	4.4	1.82	3.07	1.34	16.4	5.6	72	6.1	410	95.09	23	0.58	NULL	NULL	NULL	2.64	1.53	4.22	119.1	16.3	16.22	<9.00
84	male	165.0cm	76.0Kg	97cm	100cm	0.97	129mmHg	73mmHg	5.03	4.19	134	32	95	129	13	16	52.9	4.04	1.82	2.99	1.31	6.36	NULL	69	5	385	86.38	16.7	0.76	NULL	NULL	NULL	0.304	1.93	4.6	143.5	23.17	115.6	14.78
62	male	162.0cm	61.0Kg	84cm	92cm	0.91	105mmHg	46mmHg	7.21	4.77	126	26.4	86.4	286	12	16	45.1	4.78	1.2	2.71	1.57	8.88	NULL	81	4.7	329	99.88	18.2	0.82	NULL	NULL	NULL	3.72	2.14	5.95	90.74	16.35	14.62	15.1
62	male	166.0cm	72.0Kg	90cm	91cm	0.99	124mmHg	73mmHg	6.38	4.88	145	29.7	85.2	169	34	20	47.9	3.47	0.85	3.32	1.35	4.88	NULL	53	5.5	180	NULL	12.5	0.8	4.19	140	101.6	4.41	1.6	4.02	95.08	13.18	16.02	13.13
60	female	169.0cm	87.0Kg	99cm	110cm	0.90	126mmHg	68mmHg	5.53	3.74	131	35	105.6	255	8	12	45.6	4.23	1.96	2.54	1.77	4.79	NULL	86	4.3	672	NULL	12	0.83	NULL	NULL	103.4	1.08	2.12	6.11	117.4	19.12	14.2	10.4
80	male	169.0cm	51.0Kg	69cm	86cm	0.80	150mmHg	87mmHg	9.9	4.94	156	31.6	92.5	268	24	19	50	4.17	1.32	2.27	3.54	5.69	5.3	60	4.9	332	117	19	0.77	NULL	NULL	NULL	5.56	1.68	4.27	107	15.4	15.58	16.88
68	male	171.0cm	67.0Kg	92cm	95cm	0.97	155mmHg	100mmHg	3.35	4.42	153	34.6	102.5	141	28	24	51.4	5.57	1.33	4.28	2.86	5.13	7.7	82	5.6	375	86.72	14.7	0.97	NULL	NULL	NULL	5.74	1.61	4.93	101	18.2	22	<9.00
60	male	170.0cm	66.0Kg	86cm	94cm	0.91	136mmHg	79mmHg	6.36	5.19	161	31	90.6	200	23	19	49.2	4.39	1	2.01	1.41	5.14	5.9	76	5.4	249	NULL	215.6	0.79	NULL	NULL	NULL	3.69	2.07	5.18	114.1	18.66	12.02	15.96
89	male	151cm	63Kg	90cm	102cm	0.88	131mmHg	64mmHg	5.83	5.2	155	29.8	93.7	177	30	28	48.6	5.28	1.37	2.49	3.34	6.26	5.2	93	6.4	360	82.17	22.4	0.96	4.59	141.1	NULL	3.79	1.58	4.08	101	16.9	13.2	13.03
69	female	156.0cm	56.0Kg	80cm	96cm	0.83	131mmHg	77mmHg	4.29	4.46	138	30.9	97.5	165	17	20	47.3	5.03	1.8	3.76	1.58	4.52	4.9	83	5.2	376	101.86	11.3	0.85	4.35	139.3	106.2	1.78	2.06	5.47	89.62	15.42	10.3	<9.00
61	female	156.0cm	75.0Kg	96cm	101cm	0.95	133mmHg	86mmHg	5.52	5.08	161	31.7	95.7	189	9	17	54.6	3.62	1.39	3.6	1.52	5.12	NULL	84	7.2	358	109.23	15.4	0.71	NULL	NULL	NULL	2.7	1.38	5.14	78.4	16.4	78.71	9.69
65	female	149.0cm	50.0Kg	78cm	87cm	0.90	151mmHg	76mmHg	4.81	4.22	128	30.3	96.4	235	10	14	47.3	4.91	2.06	4.26	1.71	7.24	NULL	68	4.7	572	113.56	11.1	0.82	4.15	143.7	NULL	5.11	2.1	5.03	121.9	18.53	12.1	433
62	female	161.0cm	72.0Kg	88cm	104cm	0.85	144mmHg	79mmHg	5.1	5.54	166	30	87.4	302	21	23	49.8	4.54	1.29	2.57	3.47	6.24	5.6	73	3.4	261	80.13	7.1	1.03	NULL	NULL	NULL	6.25	1.56	4.97	103	15.8	15.7	12.52
76	male	168.0cm	77.0Kg	95cm	103cm	0.92	133mmHg	77mmHg	9.23	5.1	164	32.2	95.3	243	31	29	48.5	4.37	1.29	3.15	3.08	5.68	NULL	87	6.6	471	98.28	NULL	0.91	NULL	NULL	NULL	0.079	5.06	18.07	166.8	29.02	17.85	166.6
78	female	148.0cm	60.0Kg	90cm	110cm	0.82	181mmHg	108mmHg	4.51	4.6	144	31.3	94.1	240	75	36	46.4	5.4	1.18	2.27	1.69	5.16	5.9	78	4.2	532	NULL	15.1	0.91	NULL	NULL	NULL	1.26	2.06	5.78	68.4	15.08	15.2	8.51
76	male	163.0cm	63.0Kg	89cm	93cm	0.96	122mmHg	75mmHg	6.22	5.25	154	29.3	89.5	249	66	43	48.1	4.86	1.44	2.13	4.23	5.02	5.3	60	3.7	243	106.79	10.4	0.75	4.07	140.5	NULL	2.57	1.6	4.32	85.4	14.7	11.5	9.5
60	male	176cm	87Kg	95cm	105cm	0.90	130mmHg	75mmHg	7.79	4.11	127	30.9	90.5	259	13	15	46.4	4.29	0.96	2.8	1.49	5.73	NULL	89	6.9	435	NULL	15.8	0.88	NULL	NULL	NULL	1.36	2.04	5.38	93.5	15.5	11	23.12
64	female	156cm	53Kg	68cm	90cm	0.76	121mmHg	71mmHg	4.3	4.28	131	30.6	95.1	185	35	33	43.2	4.18	1.34	3.28	3.91	5.59	5.7	52	5.5	238	125.26	NULL	0.67	NULL	NULL	NULL	2.39	1.46	4.76	96.44	16.68	21.3	12.74
64	female	152.0cm	51.0Kg	76cm	90cm	0.84	132mmHg	70mmHg	5.29	4.35	132	30.3	95.4	221	11	18	47.6	4.64	1.46	2.25	1.32	5.01	6	87	2.7	366	84.8	10.9	0.68	NULL	NULL	NULL	1.96	1.61	4.49	100.3	14.73	30.8	46.2
66	female	161.0cm	61.0Kg	83cm	91cm	0.91	150mmHg	78mmHg	5	4.78	161	33.7	97.9	127	47	36	49.9	5.54	1.05	2.67	1.34	9.62	5.7	85	6	339	96.23	13.8	0.85	NULL	NULL	NULL	0.956	1.83	5.05	98.3	15.9	166	30.83
63	female	152.0cm	73.0Kg	100cm	105cm	0.95	143mmHg	79mmHg	7.65	5.12	171	33.4	96.5	281	24	26	47.1	5.04	1.25	2.31	1.58	5.01	6.1	88	5.3	439	84.82	9.7	0.87	NULL	NULL	NULL	2.15	1.79	5.35	105.3	17.43	12.7	19.01
65	male	161.0cm	70.0Kg	96cm	101cm	0.95	157mmHg	83mmHg	6.01	5.12	157	30.7	92.8	250	28	20	47.4	4.96	0.96	4.04	1.41	5.62	5.1	38	7.3	347	NULL	17.2	0.74	NULL	NULL	105	2.6	1.69	4	104.4	14.32	12.19	<9.00
77	female	141.0cm	42.0Kg	72cm	82cm	0.88	152mmHg	66mmHg	4.73	4.53	131	28.9	91.6	270	11	19	43.2	3.62	1.62	1.49	3.43	5.98	6.1	93	3.5	441	88.77	NULL	0.92	NULL	NULL	NULL	1.44	1.95	6.58	121.4	19.83	<10.00	7.98
81	female	NULL	NULL	NULL	NULL	NULL	NULL	NULL	3.83	5.81	121	20.8	68.7	230	13	19	49.6	5.25	1.63	2.85	1.36	5.3	7	92	3.6	501	NULL	14	1.27	NULL	NULL	NULL	3.35	1.74	4.72	88.78	14.79	10.5	<9.00
63	female	157.0cm	68.0Kg	91cm	105cm	0.87	147mmHg	89mmHg	4.51	4.8	142	29.6	89.2	190	28	33	47.5	3.61	1.52	4.29	1.98	6.57	NULL	65	4.9	248	NULL	12.4	0.71	NULL	NULL	NULL	7.75	2.17	6.19	89.06	16.62	13	11.61
68	female	158.0cm	80.0Kg	97cm	108cm	0.90	131mmHg	74mmHg	5.06	5.64	173	30.7	90.1	269	35	27	47.3	4.46	1.12	1.7	1.5	5.92	5.9	73	7.3	277	99.26	14.6	0.69	NULL	NULL	NULL	2.27	2.19	4.9	102	12.7	21.02	14.41
73	female	147cm	45Kg	77cm	90cm	0.86	114mmHg	61mmHg	6.56	4.55	139	30.5	94.5	246	17	22	44	4.49	1.51	3.07	1.47	4.69	5.5	88	6.3	476	87.85	13.7	0.87	NULL	NULL	NULL	1.6	1.78	5.83	62.88	14.28	14.4	<9.00
68	female	155.0cm	58.0Kg	76cm	95cm	0.80	143mmHg	77mmHg	7.95	4.51	135	29.9	94	199	17	17	47.1	2.73	1.26	4.31	4.24	5.6	5.8	85	5.8	260	76.32	NULL	1.13	NULL	NULL	NULL	7.83	2.13	5.04	94.7	12.3	122	9.36
61	female	158.0cm	59.0Kg	86cm	100cm	0.86	110mmHg	59mmHg	4.9	5.43	162	29.8	89.7	163	22	21	49.7	4.88	1	3.27	1.31	5.25	NULL	80	6.2	394	NULL	10.8	0.63	NULL	NULL	NULL	0.85	1.76	5.02	93.46	17.92	21.15	83.78
68	female	154.0cm	57.0Kg	86cm	97cm	0.89	162mmHg	99mmHg	6.81	4.58	127	27.7	84.3	348	28	29	42.8	6.59	2.13	3.22	2.01	4.87	5.5	71	4.7	377	106.96	16.3	0.74	NULL	NULL	NULL	1.25	1.8	5.99	75.38	16.75	25.6	15.51
63	female	154cm	61Kg	78cm	98cm	0.80	136mmHg	84mmHg	6.02	5.64	161	28.5	84.2	240	21	16	51.1	5.15	1.03	3.67	1.27	5.41	5.1	74	4.2	434	108.15	7.5	0.9	NULL	NULL	NULL	4.07	1.53	5.45	104	20.9	247	35.7
66	female	164cm	69Kg	90cm	103cm	0.87	126mmHg	67mmHg	5.47	5.34	164	30.7	92.5	150	27	25	49.3	4.65	1.06	3.71	3.75	4.85	5.9	75	6.5	352	67.39	10.2	1.08	4.03	143.8	NULL	4.13	1.51	4.19	90.9	14.2	898	6.06
62	male	168cm	59.0Kg	80cm	92cm	0.87	110mmHg	69mmHg	4	4.37	134	30.7	92	185	9	11	46.3	4.81	1.61	2.29	1.52	4.47	5.2	87	4.7	422	99.67	14.2	0.82	NULL	NULL	NULL	2.98	1.92	4.51	93.51	13.01	95.9	12.17
63	female	153.0cm	64.0Kg	93cm	103cm	0.90	129mmHg	77mmHg	5.97	4.65	130	28	86	179	13	21	44.4	5.81	1.9	2.69	1.53	5.69	NULL	51	3.2	391	NULL	13.1	0.98	NULL	NULL	NULL	0.85	2.68	7.89	97.47	19.14	152.2	<9.00
61	female	151cm	57.0Kg	77cm	93cm	0.83	138mmHg	73mmHg	4.75	4.27	120	28.1	89.7	217	20	20	46.5	4.23	2.06	2.63	1.26	4.53	NULL	84	3.6	424	NULL	11.9	0.85	4.55	142.4	NULL	3.67	2.11	6.51	109.6	18.19	135	8.59
63	male	169.0cm	67.0Kg	80cm	94cm	0.85	120mmHg	76mmHg	6.35	5.16	159	30.8	95.7	268	16	19	47.7	5.59	1.55	1.74	1.56	4.94	NULL	89	4.3	358	NULL	12.8	0.82	NULL	NULL	NULL	0.812	1.61	5.26	66.76	13.15	3164	9.74
69	male	162.0cm	68.0Kg	93cm	102cm	0.91	126mmHg	74mmHg	6.53	5.2	137	26.3	81	144	16	20	49.3	4.42	0.81	3.45	1.57	5.85	6.5	62	5.2	334	103.94	24	0.87	NULL	NULL	NULL	1.6	1.99	5.22	111	17.44	209.8	11.71
60	female	150.0cm	50.0Kg	76cm	90cm	0.84	140mmHg	80mmHg	5.65	5.53	167	30.2	91.7	125	20	19	49.2	4.29	1.34	4.02	1.32	6.65	5.2	55	4	204	105.36	14.7	0.74	NULL	NULL	NULL	3.9	2.68	5.66	114.9	15.35	299.1	11.61
64	female	153cm	54Kg	78cm	98cm	0.80	134mmHg	69mmHg	5.13	4.94	109	22.1	69.8	172	6	13	43.5	3.42	1.28	3.51	1.62	5.54	NULL	42	4.3	290	NULL	NULL	0.71	NULL	NULL	NULL	1.37	1.95	4.84	103.9	17.5	207	8.88
63	male	160.0cm	53.0Kg	74cm	90cm	0.82	142mmHg	79mmHg	4.33	4.95	155	31.3	92.7	192	21	22	49	5.57	1.16	2.51	3.43	4.76	5.2	78	4.2	500	102.9	13	0.84	NULL	NULL	NULL	3.4	2.49	6.18	109.1	18.01	16.73	<9.00
68	male	167.0cm	78.0Kg	91cm	110cm	0.83	138mmHg	89mmHg	5.05	4.5	116	25.8	82.7	283	11	19	42.7	4.44	1.61	1.47	1.44	5.74	6.7	69	2.8	311	104.48	15.3	0.97	NULL	NULL	NULL	0.911	1.42	4.42	70.28	17.17	13.03	11.45
66	male	154.0cm	56.0Kg	82cm	92cm	0.89	127mmHg	80mmHg	5.71	4.24	137	32.3	98.1	256	18	21	44.4	5.51	1.44	2.85	1.25	4.79	5.3	86	4	395	103.95	19.9	0.75	4.92	142.9	NULL	1.74	2.13	5.1	151	23.55	12.7	5.47
62	female	163.0cm	61.0Kg	73cm	99cm	0.74	112mmHg	60mmHg	7.55	5.05	151	29.9	90.9	178	7	12	47.1	4.75	1.31	3.15	1.98	5.73	6.2	70	4.2	444	NULL	8.4	0.89	NULL	NULL	NULL	4.87	1.85	4.88	104.1	15.62	15.4	<9.00
84	male	155cm	57Kg	93cm	98cm	0.95	144mmHg	70mmHg	5.88	5.05	136	26.9	86.7	239	15	21	47.9	4	1.14	2.08	0.52	5.97	5.4	80	3.9	319	88.56	13.5	0.78	NULL	NULL	NULL	0.986	1.87	4.76	91.5	19.13	<10.00	7.26
65	female	151.0cm	59.0Kg	94cm	103cm	0.91	146mmHg	97mmHg	7.81	4.59	142	30.9	92.2	206	26	23	48.4	4.72	1.26	3.97	3.03	4.96	5.5	67	4.8	319	108.21	NULL	0.87	NULL	NULL	NULL	2.13	1.71	4.59	107	15.1	22.62	173.4
69	male	159cm	68Kg	88cm	100cm	0.88	134mmHg	75mmHg	6.13	5.48	167	30.5	91.4	252	30	25	52.4	5.83	1.14	2.22	1.06	19.53	4.7	91	4.2	454	99.85	10.1	1.1	NULL	NULL	NULL	1.63	1.97	5.75	125.2	22.36	<10.00	13.9
63	male	163.0cm	85.0Kg	104cm	108cm	0.96	143mmHg	83mmHg	6.32	5.76	168	29.2	91.3	266	17	20	54.5	4.44	1.03	2.27	0.76	6.34	5	66	4.4	231	108.65	18.2	0.72	NULL	NULL	NULL	2.1	1.79	4.99	89.9	16	<10.00	9.83
75	male	160cm	77.9Kg	100cm	99cm	1.01	163mmHg	65mmHg	7.94	4.96	154	31	94.4	229	24	16	54.2	4.24	1.06	2.66	1.07	6.76	NULL	67	3.1	386	NULL	20.2	0.91	NULL	NULL	NULL	2.07	1.22	3.78	95.85	17.69	11.08	12.94
63	male	158cm	57Kg	74cm	92cm	0.80	124mmHg	71mmHg	6.78	5.27	168	31.9	97.3	133	18	19	54.6	4.34	0.88	2.44	0.65	4.57	5.4	98	7.4	379	90.66	13.9	0.96	NULL	NULL	NULL	3.46	1.62	4.97	79.9	14.5	16.89	11.73
78	male	160cm	68.5Kg	86cm	92cm	0.93	134mmHg	53mmHg	6.23	6.58	135	20.5	67.2	312	16	19	48.7	4.43	1.5	1.31	1.04	7.13	5.9	77	4.1	352	NULL	NULL	1.06	NULL	NULL	NULL	3.29	2.76	6.72	134.1	17.66	<10.00	12.84
78	male	162cm	43Kg	67cm	84cm	0.80	115mmHg	61mmHg	5.63	4.86	144	29.6	88.7	257	25	16	41.4	4.46	0.91	2.84	1.21	4.55	5.5	85	6.1	385	78.91	NULL	0.83	NULL	NULL	NULL	5.55	1.33	3.82	96	16	<10.00	14.96
80	male	159.0cm	65.0Kg	90cm	97cm	0.93	157mmHg	67mmHg	5.07	4.41	134	30.4	92.5	181	17	20	46.7	4.5	1.68	0.9	0.66	4.07	5.5	60	4.8	283	NULL	NULL	0.66	NULL	NULL	NULL	1.77	1.75	5.46	106.6	19.6	<10.00	6.77
70	male	165cm	65.9Kg	81cm	90cm	0.90	161mmHg	89mmHg	6.56	5.18	160	30.9	89.8	123	78	34	47.9	5.24	0.95	3.71	0.84	4.95	5.4	56	4.9	288	NULL	NULL	0.66	NULL	NULL	NULL	2.81	2.07	5.47	124	19.97	10.26	8.71
70	male	167cm	79Kg	102cm	105cm	0.97	145mmHg	94mmHg	5.65	5.69	165	29	88.6	181	16	13	44.1	5.22	1.07	2.2	2.1	7.71	5.7	56	5.6	337	NULL	15.9	0.73	NULL	NULL	NULL	4.96	1.52	4.94	113.2	19.97	172	9.14
60	male	163cm	57Kg	79cm	87cm	0.91	126mmHg	70mmHg	4.21	4.39	134	30.5	96.6	209	28	28	50	4.74	1.31	3.56	0.81	7.62	5.6	55	4.4	269	NULL	15.5	0.9	NULL	NULL	NULL	2.04	1.87	5.09	124.3	23.79	13.8	13.81
62	male	153cm	63Kg	91cm	94cm	0.97	113mmHg	64mmHg	8.95	5.89	191	32.4	98	165	49	25	44	4.74	1.06	4.98	1.12	5.08	9.4	68	6.8	290	101.48	16.7	0.76	NULL	NULL	NULL	2.62	1.58	4.55	110.5	18.65	60.79	7.41
70	male	163.0cm	62.0Kg	92cm	86cm	1.07	117mmHg	73mmHg	3.13	4.41	131	29.7	93.2	135	17	20	45.1	4.5	1.75	4.33	0.7	4.19	5.7	91	5.3	442	84.36	NULL	0.94	NULL	NULL	NULL	2.49	1.99	5.76	107	17.5	13.86	19.33
66	male	159.0cm	59.0Kg	83cm	92cm	0.90	99mmHg	59mmHg	6.98	4.73	149	31.5	89.9	185	39	28	47.8	2.39	1.12	3.21	0.89	6.73	5.3	55	5.7	337	105.36	NULL	0.78	NULL	NULL	NULL	8.3	1.83	4.77	103	14.7	<10.00	7.58
61	male	164cm	60Kg	79cm	89cm	0.89	148mmHg	88mmHg	7.5	6.05	199	32.9	95.2	183	74	39	53.8	5.5	1.26	3.84	0.96	5.48	5.8	87	6	407	103.23	NULL	0.72	NULL	NULL	NULL	1.64	1.73	5.52	84.59	17.65	35.81	20.11
63	male	157cm	60.1Kg	83cm	93cm	0.89	136mmHg	74mmHg	7.01	4.35	135	31	89.9	234	38	24	48.8	5.04	1.14	3.71	0.92	5.36	5.5	78	3.5	332	NULL	NULL	0.87	NULL	NULL	101	3.21	2.1	5.36	99.45	16.89	<10.00	9.52
70	male	167.0cm	66.0Kg	92cm	98cm	0.94	135mmHg	90mmHg	7.53	5	161	32.2	97.8	232	21	23	47.8	4.95	1.62	3.74	1.2	5.12	5.3	65	4.4	496	NULL	NULL	0.85	NULL	NULL	NULL	2.27	2.22	6.39	111.5	19.5	35.75	12.45
61	male	173.0cm	68.0Kg	89cm	98cm	0.91	124mmHg	80mmHg	5.31	4.99	165	33.1	100.8	108	42	29	51.3	4.38	1.3	4.43	2.63	5.61	NULL	126	5.3	384	58.54	NULL	1.09	NULL	NULL	NULL	1.88	1.77	4.88	115	17.5	<10.00	<9.00
86	male	163.0cm	63.0Kg	78cm	95cm	0.82	160mmHg	92mmHg	7.92	5.41	160	29.6	88.4	273	69	36	50.5	4.77	0.88	2.98	2.03	4.91	5.7	78	6.5	518	95.25	NULL	0.88	NULL	NULL	NULL	3.75	2.47	6.17	107	17	11.6	9.32
76	male	165cm	64.5Kg	87cm	92cm	0.95	118mmHg	64mmHg	5.16	4.35	137	31.5	92.4	144	15	19	52.7	3.21	1.84	2.53	0.74	6.64	5.4	85	4	327	98.28	NULL	0.8	NULL	NULL	NULL	1.67	1.8	4.94	115	18.1	<10.00	7.6
63	male	164cm	70Kg	85cm	92cm	0.92	121mmHg	75mmHg	9.03	4.77	136	28.5	88.3	132	17	19	43.4	4.32	1.35	3.76	1.21	7.71	5.2	87	3.7	351	94.89	NULL	0.88	NULL	NULL	NULL	1.95	2.14	5.99	120	21.4	10.23	32.78
78	male	158cm	73.6Kg	96cm	102cm	0.94	138mmHg	71mmHg	5.85	6.08	138	22.7	74.2	258	15	22	47.6	5.84	1.04	4	1.09	8.34	5.1	91	6.8	419	96.41	NULL	0.74	NULL	NULL	NULL	1.9	1.72	5.14	99.8	17.8	<10.00	37.13
64	male	166cm	76.7Kg	97cm	98cm	0.99	131mmHg	62mmHg	6.35	5.58	166	29.7	88.7	212	36	26	48.1	4.82	1.28	1.9	0.92	6.09	NULL	74	3.4	415	NULL	NULL	0.72	NULL	NULL	NULL	1.64	1.45	4.69	76.38	16.43	<10.00	8.75
60	male	162cm	59Kg	77cm	89cm	0.87	112mmHg	70mmHg	6.52	5.53	168	30.4	93.9	224	28	24	48.4	5.28	1.16	3.76	0.87	4.8	5.2	67	4.1	273	103.74	11.9	0.66	NULL	NULL	NULL	3.36	2.01	5.11	102	15.2	<10.00	491.9
75	male	166cm	67.4Kg	91cm	93cm	0.98	120mmHg	70mmHg	8.46	5.17	156	30.2	89.4	256	22	19	44.7	4.27	0.78	3.17	0.57	5.17	4.7	63	5.8	145	102.72	NULL	0.72	NULL	NULL	NULL	3.98	1.99	4.49	90.2	13.2	<10.00	9.93
60	male	170cm	73Kg	87cm	98cm	0.89	125mmHg	83mmHg	6.15	5.41	167	30.9	94.1	291	17	13	53.2	4.22	1.52	3.07	0.68	4.94	NULL	53	3	221	115.22	NULL	0.62	NULL	NULL	NULL	2.14	1.81	5.33	96.41	18.76	<10.00	22.37
73	male	156cm	62Kg	80cm	93cm	0.86	136mmHg	72mmHg	5.55	5.06	157	31	93.3	199	18	14	45.3	4.62	1.05	3.09	1.11	5.22	5.8	67	3.6	265	84.03	23.2	0.78	NULL	NULL	NULL	4.51	1.7	4	92.6	14	10.04	11.53
73	male	166.0cm	71.0Kg	96cm	96cm	1.00	147mmHg	91mmHg	9.09	5.71	165	28.9	86.7	229	31	25	53.5	4.49	0.98	3.44	0.94	5.85	5.1	89	4.1	375	93.62	16.4	0.89	NULL	NULL	NULL	1.59	1.74	5.13	112.5	21.32	13.97	9.51
61	male	NULL	NULL	NULL	NULL	NULL	106mmHg	63mmHg	16.35	5.36	154	28.7	87.1	304	26	18	49.9	5.45	1.5	1.81	1.22	7.59	5.5	54	4.9	281	NULL	NULL	0.63	3.63	140.5	NULL	2.6	2.1	4.85	118.9	18.98	<10.00	13.79
80	male	160cm	71Kg	96cm	103cm	0.93	151mmHg	65mmHg	5.41	5.49	155	28.2	87.2	272	45	31	48.2	4.82	1.25	2.61	1.06	4.9	5.9	67	4.6	305	NULL	NULL	0.83	4.2	141.6	NULL	2.18	1.76	5.4	90.11	16.45	12.91	12.4
75	male	166cm	66.2Kg	88cm	98cm	0.90	143mmHg	52mmHg	5.52	4.87	154	31.6	90.6	218	36	25	44.4	7.02	1.07	3.32	0.89	5.17	NULL	86	5.6	330	85.39	NULL	0.92	NULL	NULL	NULL	2.34	1.45	4.21	69.67	14.01	<10.00	8.94
80	male	163cm	72Kg	98cm	103cm	0.95	136mmHg	79mmHg	6.43	5.28	161	30.5	92.6	208	60	30	47.9	5.68	1.39	2.48	1.03	5.5	5.4	78	6.2	290	105.09	NULL	0.79	NULL	NULL	NULL	3.57	1.72	5.02	85.71	18.99	>4000.00	22.46
74	male	160.0cm	73.0Kg	93cm	98cm	0.95	158mmHg	83mmHg	9.1	4.82	148	30.7	95.4	227	11	21	47.1	3.44	1.05	1.43	0.54	11.14	5	47	3.2	240	125.9	88.9	0.57	NULL	NULL	NULL	2.04	2	5	107.3	17.78	12.16	8.28
61	male	165cm	68.9Kg	85cm	94cm	0.90	128mmHg	76mmHg	6.24	4.63	142	30.7	95.5	191	26	19	51.8	4.78	1.6	2.91	0.73	5.37	5.9	59	4	270	NULL	16.2	0.84	NULL	NULL	97	2.29	1.26	4.07	66.33	14.5	<10.00	10.19
62	male	168.0cm	59.0Kg	74cm	86cm	0.86	101mmHg	62mmHg	5.95	4.44	133	30	92.8	222	13	20	45.3	5.34	1.83	3.06	2.04	5.05	NULL	94	4.2	442	NULL	11.4	0.94	NULL	NULL	100.8	3.14	2.16	6.66	113.2	19.78	16.83	<9.00
78	male	157cm	61Kg	81cm	89cm	0.91	135mmHg	74mmHg	4.51	4.66	153	32.8	98.3	126	19	24	45.4	4.19	1.41	2.45	1.13	5.4	NULL	57	4.4	228	NULL	NULL	0.63	NULL	NULL	102.8	1.94	1.61	4.46	85.71	14.56	88.46	13.78
74	male	165.0cm	49.0Kg	68cm	85cm	0.80	110mmHg	63mmHg	5.62	5.05	160	31.7	92.7	289	23	23	48.9	5.09	1.05	3.03	1.05	4.33	5.6	86	4.3	416	104.68	17.2	0.77	NULL	NULL	NULL	1.5	2.24	5.67	112	15.4	10.24	11.02
61	male	164.0cm	60.0Kg	76cm	93cm	0.82	111mmHg	69mmHg	5.11	4.96	151	30.4	93.3	237	9	17	46.6	4.92	2.04	2	0.64	5.28	NULL	59	6.5	188	NULL	NULL	0.69	NULL	NULL	NULL	10.23	1.45	5.11	79.94	14.51	14.19	16.4
76	male	165cm	58Kg	76cm	87cm	0.87	108mmHg	78mmHg	9	4.14	122	29.5	95.9	439	19	19	46.8	4.19	1.65	3.56	0.62	5.08	NULL	85	3.2	305	95.56	14.7	0.75	NULL	NULL	99.2	1.74	1.76	5.63	103.6	16.61	12.72	163.8
77	male	164cm	55.4Kg	85cm	91cm	0.93	124mmHg	60mmHg	5.4	4.22	132	31.3	96.9	155	14	16	44.1	4.7	2.23	2.59	0.99	3.92	5.9	63	4.5	242	116.57	NULL	0.7	5.06	139.6	NULL	2.14	1.46	3.73	80.9	10.8	<10.00	16.49
63	male	174cm	77Kg	86cm	98cm	0.88	123mmHg	76mmHg	5.65	4.8	149	31	95.4	201	80	70	51	4.51	1.54	2.71	1.09	6.79	5.7	66	4.2	289	93.1	12.7	0.86	NULL	NULL	NULL	3.74	1.65	4.36	97.1	14	11.62	12.53
69	male	157cm	74.7Kg	98cm	97cm	1.01	153mmHg	71mmHg	5.5	4.62	142	30.7	93.3	231	10	15	49	3.98	1.83	3.98	0.69	5.52	NULL	72	3.6	447	NULL	14.6	0.76	NULL	NULL	101.4	0.838	2.38	5.15	131.3	20.56	13	8.67
60	male	169.0cm	51.0Kg	64cm	82cm	0.78	110mmHg	61mmHg	4.74	4.5	140	31.1	94.7	258	7	17	49.1	3.89	1.83	3.93	0.58	4.74	5.3	41	4.1	330	133.55	14.5	0.67	NULL	NULL	NULL	1.75	1.86	5.32	129.6	22.11	202.7	16.84
67	male	159cm	62Kg	88cm	94cm	0.94	167mmHg	98mmHg	4.19	5.46	161	29.5	88.6	165	24	21	49.9	4.06	1.29	4.17	1.03	5.42	5.9	79	3.5	397	NULL	NULL	0.96	NULL	NULL	NULL	2.65	2.09	5.39	100.3	15.56	<10.00	16.17
63	male	160cm	55Kg	78cm	88cm	0.89	129mmHg	72mmHg	4.39	4.44	135	30.4	94.1	305	9	26	54.5	5.36	2.04	4.3	0.81	5.24	4.7	59	4	270	NULL	NULL	0.78	NULL	NULL	NULL	4.13	1.69	5.46	82.01	15.77	17.86	65.01
67	male	157cm	59Kg	80cm	90cm	0.89	114mmHg	68mmHg	8.5	6.75	156	23.1	72.7	265	55	26	48.3	6.23	1.25	2.39	1.05	5.3	5.4	63	5.6	278	120.73	NULL	0.75	NULL	NULL	NULL	3.56	1.25	4.02	75.1	14.9	13.82	8.69
84	male	169cm	62.0Kg	91cm	94cm	0.97	112mmHg	66mmHg	7.24	4.75	127	26.7	86.3	147	14	24	46.5	3.65	1.54	2.51	1.05	4.97	5.9	81	4.08	399	NULL	NULL	0.77	NULL	NULL	NULL	1.54	2	5.52	102.8	19.63	12.27	299.8
66	male	159cm	55Kg	77cm	92cm	0.84	109mmHg	70mmHg	3.44	4.06	121	29.8	89.9	254	8	14	45	5.01	1.24	2.57	1.19	4.52	NULL	53	4.7	234	NULL	NULL	0.72	NULL	NULL	NULL	3.64	1.52	4.21	97.47	15.78	13.46	>600.00
62	male	159cm	53Kg	68cm	83cm	0.82	110mmHg	62mmHg	4.8	3.95	124	31.4	95.2	290	8	20	51.7	4.51	1.64	2.63	0.75	4.94	NULL	74	2.9	205	81.64	22.1	0.73	NULL	NULL	NULL	3.34	1.49	3.94	104.9	17.43	<10.00	23.65
77	male	164cm	65Kg	86cm	93cm	0.92	150mmHg	79mmHg	4.93	4.44	135	30.4	90.8	216	14	15	49.4	5.94	1.95	3.41	1.03	14.31	NULL	77	3.4	408	NULL	NULL	1.06	NULL	NULL	NULL	7.01	1.59	4.63	99.51	16.59	12.16	51.18
71	male	164.0cm	76.0Kg	88cm	92cm	0.96	153mmHg	80mmHg	7.8	4.86	153	31.5	96.7	187	21	25	51.4	4.55	1.65	3.59	0.58	5.2	6	51	5	272	NULL	NULL	0.73	NULL	NULL	NULL	1.51	2.08	6.47	102.4	19.18	<10.00	17.27
61	male	171cm	75Kg	86cm	98cm	0.88	141mmHg	87mmHg	7.24	5.25	155	29.5	89.5	367	53	31	50	5.1	1.45	3.01	1.14	9.54	5.5	88	3.8	265	101.1	NULL	0.9	NULL	NULL	NULL	1.86	1.54	5.39	91.5	20.9	<10.00	10.62
68	male	162cm	66Kg	77cm	93cm	0.83	128mmHg	70mmHg	4.97	4.52	129	28.5	90.3	160	16	23	49.2	5.7	1.39	2.86	1.08	4.69	6.1	91	4.5	410	NULL	NULL	0.89	NULL	NULL	NULL	1.97	2.05	6.14	107.1	16.27	<10.00	6.47
75	male	167cm	64.1Kg	79cm	93cm	0.85	135mmHg	60mmHg	6.53	4.69	144	30.7	91	274	57	35	47.5	6.51	0.8	2.38	0.69	4.83	NULL	107	4	417	67.44	NULL	1.03	NULL	NULL	NULL	1.58	1.85	5.13	106	16.6	<10.00	7.51
69	male	159cm	74Kg	92cm	98cm	0.94	118mmHg	75mmHg	5.15	4.78	148	31	97.7	132	26	20	44.3	3.97	1.66	2.64	0.5	5.64	NULL	63	5.3	307	NULL	NULL	0.79	4.1	141.1	NULL	0.34	1.16	3.58	103.2	17.27	<10.00	6.52
64	male	166.0cm	70.0Kg	94cm	98cm	0.96	133mmHg	80mmHg	5.37	4.51	136	30.2	95.1	264	12	15	44.7	5.85	1.12	3.58	1.97	6.1	NULL	115	4.8	467	58.84	11.1	1.18	NULL	NULL	NULL	3.78	1.79	4.92	134.1	22.84	<10.00	<9.00
60	male	174cm	69Kg	80cm	93cm	0.86	118mmHg	75mmHg	6.19	4.43	141	31.8	98.6	241	9	17	47.1	3.84	1.44	1.76	1.12	4.09	5.1	109	7.9	452	79.16	NULL	0.95	4.53	142.1	NULL	0.848	1.88	5.81	99.4	19.3	13.14	10.64
62	male	162cm	62.6Kg	81cm	89cm	0.91	133mmHg	88mmHg	4.9	4.47	132	29.5	88.6	176	47	41	47.5	4.25	1.82	4.55	0.77	5	4.8	93	3.5	570	92.6	NULL	1.08	NULL	NULL	NULL	1.86	1.23	4.06	73.35	16.42	<10.00	13.2
64	male	171cm	62.3Kg	83cm	90cm	0.92	115mmHg	67mmHg	7.14	4.59	138	30.1	93	313	10	13	52.7	4.97	1.65	2.67	0.92	7.74	6	71	6.6	449	NULL	25	0.85	NULL	NULL	NULL	3.59	1.75	4.8	100.2	17.72	<10.00	48.49
63	male	153cm	70.4Kg	96cm	96cm	1.00	125mmHg	69mmHg	5.03	4.92	149	30.3	93.5	187	78	27	53.8	5.17	1.61	3.6	0.9	4.85	5.7	65	4	266	NULL	15.4	0.76	NULL	NULL	NULL	5.7	1.73	4.68	95.13	18.27	<10.00	10.68
66	male	172.0cm	66.0Kg	80cm	92cm	0.87	134mmHg	84mmHg	6.15	3.76	124	33	98.7	252	15	23	48.2	6.03	1.36	2.52	0.8	5.02	NULL	65	7.9	266	NULL	NULL	0.78	NULL	NULL	NULL	2.15	1.9	4.81	111.7	17.09	<10.00	10.53
62	male	173.0cm	76.0Kg	90cm	107cm	0.84	116mmHg	58mmHg	7.53	5.18	149	28.8	91.5	266	22	27	51	4.15	1.09	3.12	2.08	4.91	5.9	86	6.3	441	97.58	11.9	0.8	3.64	142.4	NULL	3.28	2.12	5.49	105	15.8	11.6	<9.00
76	male	166.0cm	66.0Kg	84cm	97cm	0.87	115mmHg	53mmHg	6.46	6.24	189	30.3	88.1	228	89	44	53.4	5.45	0.78	2.92	1.17	4.53	NULL	57	4.1	277	NULL	NULL	0.65	NULL	NULL	101	1.61	1.62	4.64	98.68	12.83	<10.00	8.57
60	male	166.0cm	64.0Kg	81cm	87cm	0.93	111mmHg	73mmHg	5.36	4.46	138	30.9	98.4	205	20	21	42	4.75	2.02	3.51	0.78	5.14	5.2	54	5.7	264	NULL	NULL	0.72	NULL	NULL	NULL	1.76	1.58	4.04	80.1	13.58	<10.00	16.45
60	male	170.0cm	77.0Kg	93cm	98cm	0.95	123mmHg	77mmHg	7.2	5.61	162	28.9	87.7	244	21	16	52.9	4.48	1.15	2.73	2.28	5.29	5.8	125	3.6	495	47.88	16.9	1.56	4.22	142.6	NULL	1.51	1.49	4.08	83.6	13.1	<10.00	<9.00
69	male	166cm	73Kg	84cm	92cm	0.91	156mmHg	70mmHg	5.53	5.44	164	30.1	90.1	201	25	24	53.9	6.07	2.22	3.13	1.03	10.86	5.5	53	3.6	253	NULL	NULL	0.8	NULL	NULL	NULL	4.8	1.79	5.46	100.1	18.68	<10.00	26.32
67	male	166cm	75Kg	100cm	98cm	1.02	139mmHg	74mmHg	6.89	4.13	131	31.7	95.2	186	14	18	47.7	5.05	1.82	3.41	0.97	7.05	5	56	5.6	309	NULL	NULL	0.78	NULL	NULL	NULL	0.725	2.05	5.77	85.06	16.74	<10.00	9.79
61	male	169cm	64Kg	79cm	92cm	0.86	215mmHg	123mmHg	5.2	4.9	152	31	94.5	159	16	19	44.6	4.76	1.04	2.48	1.12	6.33	NULL	60	4.8	255	NULL	NULL	0.62	NULL	NULL	NULL	4.2	1.84	5.11	108.4	18.48	<10.00	6.21
71	male	165cm	84.7Kg	100cm	104cm	0.96	118mmHg	67mmHg	5.57	5.37	155	28.9	86.6	347	14	17	47	4.93	0.95	2.51	0.68	6.64	NULL	60	4	324	NULL	22.2	0.68	NULL	NULL	NULL	2.22	1.41	4.49	100.9	18.43	11.99	6.42
81	male	168cm	68.7Kg	94cm	94cm	1.00	149mmHg	74mmHg	5.93	6.02	147	24.4	77.2	274	25	24	47.4	4.55	1.66	2.92	0.82	8.33	5.5	90	4.7	369	58.4	NULL	0.87	NULL	NULL	NULL	2.82	1.5	4.28	114	21.73	11.8	<9.00
60	male	171.0cm	86.0Kg	99cm	107cm	0.93	146mmHg	86mmHg	5.77	4.38	134	30.6	91.8	142	12	27	47.9	4.64	1.19	3.5	1.06	5.82	6.4	78	5.5	400	102.18	NULL	0.87	NULL	NULL	NULL	1.09	2.05	5.66	102	15.7	12.27	19.24
65	male	160cm	80.5Kg	97cm	102cm	0.95	165mmHg	97mmHg	7.32	5.3	151	28.5	86.6	246	14	22	49.6	6.52	1.28	3.33	0.64	7.88	NULL	65	4.4	243	NULL	NULL	0.76	NULL	NULL	NULL	1.53	1.74	5.52	89.21	19.25	<10.00	>600.00
62	male	183.0cm	77.0Kg	88cm	99cm	0.89	129mmHg	90mmHg	5.92	5.57	174	31.2	91.2	195	42	21	50.4	4.14	1.68	2.74	0.95	3.9	5.4	60	3.5	287	NULL	16	0.7	NULL	NULL	NULL	2.01	1.94	5.03	99.52	20.62	<10.00	15.36
73	male	176.0cm	105.0Kg	115cm	121cm	0.95	134mmHg	78mmHg	4.13	4.66	139	29.8	92.5	211	23	23	46.8	6.73	1.95	2.06	1.18	7.16	NULL	63	6.5	307	NULL	NULL	0.82	NULL	NULL	NULL	4.34	1.47	4.55	87.65	14.67	334.5	10.62
65	male	163cm	69Kg	82cm	95cm	0.86	154mmHg	90mmHg	6.41	4.69	119	25.4	84	207	13	16	43.7	5.06	1.6	2.83	0.84	5.19	NULL	74	3.5	231	NULL	NULL	0.82	NULL	NULL	NULL	5.15	2.23	5.49	121.2	18.96	<10.00	8.52
72	male	165cm	60Kg	78cm	90cm	0.87	111mmHg	67mmHg	5.62	4.28	137	32	100	276	24	22	45.4	6.12	1.18	4.17	1.12	4.7	6.9	100	4.2	309	NULL	NULL	0.99	NULL	NULL	NULL	1.42	1.95	5.14	126.9	18.76	11.87	10.7
67	male	162cm	63Kg	83cm	94cm	0.88	119mmHg	62mmHg	5.75	4.86	139	28.6	90.1	324	18	19	46.3	3.16	1.55	2.91	0.64	4.84	5.5	58	4.4	238	108.75	16.6	0.78	NULL	NULL	NULL	4.98	2.08	5.42	123.7	17.71	13.91	13.05
60	male	171.0cm	68.0Kg	81cm	92cm	0.88	124mmHg	72mmHg	4.5	5.66	163	28.8	87.1	209	72	40	52.7	5.71	1.31	1.7	2.33	4.59	NULL	87	4.4	368	NULL	15.9	0.76	4.36	138.8	NULL	4.56	1.6	4.57	97.16	15.74	10.33	63.2
70	male	160.0cm	60.0Kg	88cm	92cm	0.96	129mmHg	78mmHg	6.05	3.97	120	30.2	91.4	239	10	16	42.1	3.92	1.65	2.11	0.8	5.05	5.7	99	4	312	76.73	NULL	0.94	NULL	NULL	NULL	0.972	1.49	5.23	77.44	16.89	<10.00	21.53
83	male	151cm	54.6Kg	81cm	82cm	0.99	130mmHg	62mmHg	7.03	4.44	137	30.9	95.3	199	22	20	50.6	4.38	0.97	2.88	1.05	4.75	6.9	54	4.1	330	89.55	NULL	0.98	NULL	NULL	NULL	0.018	2.99	7.23	140.2	23.49	<10.00	13.53
65	male	169cm	66.2Kg	87cm	92cm	0.95	128mmHg	82mmHg	7.07	6.1	195	32	92.8	212	27	22	47.1	5.65	0.8	1.78	1.13	5.03	5.3	87	4.2	344	103.23	NULL	0.81	NULL	NULL	NULL	0.343	1.77	4.7	104	16.5	<10.00	11.17
72	male	NULL	NULL	NULL	NULL	NULL	153mmHg	90mmHg	6.79	5	154	30.8	97.8	185	15	19	49.4	6.25	1.27	4.07	1	5.08	NULL	85	4.3	304	NULL	NULL	0.8	NULL	NULL	NULL	1.41	1.62	4.99	83.75	14.56	10.69	11.09
73	male	161.0cm	79.0Kg	99cm	100cm	0.99	142mmHg	93mmHg	6.08	4.03	130	32.3	96	161	9	10	46.9	3.2	1.4	2.39	2.12	5.5	5.5	76	3.7	377	103.28	10.6	0.84	4.14	142.4	NULL	1.63	1.77	4.84	81.09	14.49	10.45	<9.00
65	male	168cm	58Kg	77cm	87cm	0.89	130mmHg	68mmHg	5.75	5.24	162	30.9	96.9	290	14	17	48.7	5.58	1.9	1.87	0.92	4.65	6.8	102	6.2	412	67.08	NULL	1.1	NULL	NULL	NULL	0.81	1.68	4.75	107	15.4	10.93	<9.00
77	male	167cm	72Kg	97cm	84cm	1.15	138mmHg	62mmHg	3.64	5.06	159	31.4	90.3	171	23	21	51.4	6.18	1.44	2.83	1.01	5.68	6	88	6.3	458	84.22	NULL	0.88	NULL	NULL	NULL	1.74	1.83	5.13	106.4	20.83	<10.00	6.9
61	male	170cm	70Kg	87cm	96cm	0.91	124mmHg	84mmHg	4.48	4.58	136	29.7	90.4	175	13	17	49.1	3.06	0.87	2.66	0.67	5.36	NULL	63	3.7	312	108.66	20.6	0.63	NULL	NULL	NULL	3.65	1.14	4.59	76.06	21.03	<10.00	11.37
60	male	164cm	64Kg	90cm	95cm	0.95	140mmHg	82mmHg	6.74	4.45	122	27.4	85.4	228	9	15	50.5	4.52	1.08	1.77	2.14	5.14	NULL	52	7.1	353	NULL	9.9	0.76	NULL	NULL	NULL	2.16	1.62	5.17	87.71	15.83	11.5	14.04
77	male	155cm	54.8Kg	83cm	92cm	0.90	125mmHg	69mmHg	9.55	6.48	139	21.5	70.4	323	12	14	47.6	4.03	1.62	3.66	0.61	4.71	5.8	60	4.8	235	117	NULL	0.76	NULL	NULL	NULL	0.091	2.4	6.59	100.4	16.07	<10.00	9.04
64	female	NULL	NULL	NULL	NULL	NULL	NULL	NULL	3.83	4.3	121	28.1	90.2	169	14	18	48.3	4.71	1.79	NULL	0.98	NULL	4.6	63	4.1	444	NULL	NULL	0.78	NULL	NULL	NULL	2.46	2.21	5.59	121.7	23.56	<10.00	5.98
61	male	161cm	62Kg	84cm	93cm	0.90	129mmHg	87mmHg	4.46	4.6	141	30.7	95.4	391	15	20	49.4	3.92	1.74	2.92	1.23	6.42	5.8	55	3	282	NULL	14.3	0.78	NULL	NULL	NULL	5.17	1.42	3.86	75.6	11.8	12.98	9.19
60	male	172cm	77Kg	86cm	97cm	0.89	137mmHg	94mmHg	6.23	4.91	154	31.4	93.9	167	14	20	49.5	4.8	1.79	2.81	1.09	5.57	NULL	55	4.1	232	NULL	7.2	0.74	NULL	NULL	NULL	3.33	1.71	5.05	97.15	16.19	15.69	12.4
60	male	163.0cm	81.0Kg	105cm	107cm	0.98	145mmHg	74mmHg	4.83	4.5	107	23.8	77.8	225	17	22	51.7	4.91	1.94	2.42	1.01	6.47	6	83	5.2	394	NULL	12	0.93	NULL	NULL	NULL	2.32	1.87	5.3	88.93	15.56	<10.00	13.34
62	male	170.0cm	68.0Kg	89cm	95cm	0.94	128mmHg	86mmHg	6.23	4.66	139	29.8	90.6	258	8	20	47.7	6.17	3.04	2.76	0.59	5.67	5.4	56	4.7	319	116.37	NULL	0.66	NULL	NULL	NULL	2.98	1.17	3.08	76.92	14.8	19.08	5.88
70	male	161cm	49Kg	62cm	83cm	0.75	104mmHg	61mmHg	6.39	5.21	155	29.8	89.4	243	25	23	50.6	4.82	1.57	2.08	0.71	4.65	5.3	55	5.9	251	124.7	14.8	0.63	NULL	NULL	NULL	3.25	1.95	4.91	110	17.2	<10.00	22.97
69	male	173cm	69Kg	78cm	95cm	0.82	162mmHg	72mmHg	5.52	4.36	134	30.7	91.3	292	8	14	46.5	3.57	1.77	3.84	1.03	5.04	5.4	59	4.2	296	117.65	NULL	0.71	NULL	NULL	NULL	3.6	1.94	4.83	94.8	15.5	<10.00	8.14
69	male	163cm	70Kg	86cm	96cm	0.90	138mmHg	85mmHg	5.65	4.98	146	29.3	88.2	246	46	29	48.5	3.93	1.38	2.59	0.77	5.44	5.1	64	3.9	276	NULL	NULL	0.69	NULL	NULL	NULL	3.39	1.59	4.36	102.5	16.08	11.03	11.21
61	male	163.0cm	63.0Kg	88cm	92cm	0.96	125mmHg	79mmHg	4.59	4.47	130	29.1	88.6	212	7	14	47.5	5.33	1.34	3.21	0.87	4.82	5.5	52	2.6	289	NULL	12.3	0.82	NULL	NULL	NULL	3.24	1.6	4.6	102.8	16.79	10.79	14.26
64	male	177cm	72Kg	85cm	97cm	0.88	170mmHg	104mmHg	3.89	4.31	125	29	89.8	187	14	18	46.8	4.07	1.31	1.4	0.96	5.42	6.8	58	6.3	486	NULL	NULL	1.09	NULL	NULL	NULL	0.919	1.54	4.05	100.7	20.13	<10.00	21.89
68	male	165.0cm	68.0Kg	87cm	94cm	0.93	118mmHg	74mmHg	6.17	5.24	149	28.4	87	202	90	54	52.2	5.89	0.84	3.42	0.55	4.76	5	79	4.5	263	116.16	NULL	0.69	NULL	NULL	NULL	2.68	1.74	5.56	103	17.7	<10.00	18.77
73	male	168.0cm	71.0Kg	92cm	100cm	0.92	139mmHg	75mmHg	4.63	4.31	140	32.5	97.4	302	9	17	48.8	4.53	1.91	4.12	1.05	4.32	5.6	87	5.1	397	94.22	21.7	0.92	NULL	NULL	NULL	2.91	1.94	5.01	117.5	20.14	<10.00	15.18
62	male	154cm	51Kg	81cm	87cm	0.93	119mmHg	60mmHg	5.28	4.2	137	32.6	97.6	284	11	18	48	4.93	1.57	4.45	0.66	4.44	5.2	55	5.3	259	117.89	NULL	0.67	NULL	NULL	NULL	3.97	1.83	4.55	86.63	14.74	<10.00	29.96
60	male	168.0cm	65.0Kg	87cm	92cm	0.95	112mmHg	78mmHg	4.87	4.26	141	33.1	100.7	190	36	27	50.6	3.99	1.22	3.43	1.1	7.21	NULL	65	7.9	449	NULL	14	0.84	NULL	NULL	103.9	3	2.25	6.5	89.61	18.01	10.96	8.56
82	male	174cm	64Kg	81cm	92cm	0.88	125mmHg	62mmHg	4.11	4.66	149	32	96.4	109	28	30	51.4	4.29	1.12	2.28	1.13	7.58	5.3	63	4	348	NULL	NULL	0.94	NULL	NULL	NULL	1.18	2.1	5.81	113	20.92	<10.00	13.66
82	male	159cm	59Kg	79cm	90cm	0.88	133mmHg	48mmHg	4.08	6.37	190	29.8	90.1	234	4	11	43.9	3.89	1.2	1.12	0.63	7.08	5.4	83	7.5	494	NULL	19.8	0.71	NULL	NULL	103.6	4.5	1.88	5.25	105	18.34	<10.00	10.9
63	male	NULL	NULL	NULL	NULL	NULL	140mmHg	77mmHg	7.03	4.73	147	31.1	101.9	278	12	24	47	4.33	1.55	3.63	0.84	5.33	5.6	80	4.1	413	115.87	NULL	0.79	NULL	NULL	NULL	1.43	1.87	5.1	133.1	20.93	<10.00	7.82
63	male	162cm	63.7Kg	88cm	91cm	0.97	163mmHg	81mmHg	7.07	4.46	133	29.8	96	220	21	39	50.9	7.64	1.93	3.76	1.22	5.57	5.3	85	5.2	327	88.45	NULL	1.05	NULL	NULL	NULL	1.17	2.1	5.24	143.4	23.09	11.18	12.64
66	male	171.0cm	81.0Kg	89cm	101cm	0.88	143mmHg	77mmHg	7.66	5.27	173	32.8	94.3	213	26	19	50.1	4.1	1.02	2.7	0.6	8.69	NULL	56	3.9	267	122.24	NULL	0.78	NULL	NULL	NULL	4.87	1.81	4.26	114.6	17.18	17.71	7.58
75	male	167.0cm	63.0Kg	82cm	91cm	0.90	148mmHg	76mmHg	4.94	6.25	132	21.1	67.4	201	47	36	53.9	6.21	1.71	2.39	0.93	4.88	NULL	55	5.1	280	NULL	15.5	0.67	NULL	NULL	NULL	0.809	1.6	4.32	135.5	22	16.83	9.63
77	male	158.0cm	46.0Kg	65cm	87cm	0.75	111mmHg	65mmHg	8.12	5.28	143	27.1	86.9	257	15	17	49.7	4.83	1.37	2.37	1.19	5.66	5.4	67	5.7	595	106.7	NULL	0.79	3.63	141.1	NULL	3	1.56	4.21	86.5	14.3	12.11	12.55
62	male	163cm	68Kg	85cm	98cm	0.87	143mmHg	87mmHg	6.87	4.55	136	29.9	91.4	207	11	13	52.1	4.79	1.79	3.14	0.88	4.93	NULL	65	6.6	258	NULL	14.1	0.72	NULL	NULL	NULL	2.25	1.75	5.71	79.32	15.73	<10.00	8.66
66	female	142.0cm	61.0Kg	101cm	93cm	1.09	149mmHg	79mmHg	4.73	4.9	144	29.4	89.4	122	81	43	48.7	4.67	0.88	3.26	0.71	7.21	5.4	102	4.6	525	79.39	10.7	0.83	NULL	NULL	NULL	1.79	1.61	5.05	79	17.3	13.07	10.72
63	female	149.0cm	52.0Kg	72cm	89cm	0.81	146mmHg	81mmHg	4.92	5.55	168	30.3	91.5	218	34	22	51.7	4.48	1.6	3.53	1.07	5.63	5.4	68	3.7	334	108.11	NULL	0.76	NULL	NULL	NULL	1.81	1.6	4.55	89.92	16.5	15.21	13.2
64	male	164cm	57Kg	75cm	92cm	0.82	140mmHg	80mmHg	8.48	5.83	162	27.8	87.1	182	29	23	53.5	6.93	0.92	3.25	0.91	4.8	5.7	64	4.5	260	95.28	12.3	0.72	NULL	NULL	96.8	1.97	1.75	4.97	89.66	16.68	51.84	14.48
60	male	182.0cm	74.0Kg	87cm	97cm	0.90	100mmHg	64mmHg	8.4	5.06	131	25.9	80.6	321	32	28	48.8	5.05	1.34	3.94	0.96	4.32	NULL	66	4.7	355	102	NULL	0.64	NULL	NULL	NULL	1.92	1.4	4.17	78.49	13.43	NULL	15.26
65	male	168cm	71Kg	89cm	93cm	0.96	138mmHg	74mmHg	5.74	4.25	129	30.4	92.9	208	21	20	50.2	4.02	1.66	3.55	0.65	4.68	5	79	3.4	299	122.02	NULL	0.81	NULL	NULL	NULL	2.19	1.95	5.76	98.12	17.82	10.92	8.22
64	male	159cm	54Kg	73cm	90cm	0.81	144mmHg	75mmHg	7.04	4.55	132	29	90.1	255	25	20	45.2	6.09	1.52	2.21	1.05	5.5	5.4	88	5.1	362	96.25	NULL	0.73	NULL	NULL	NULL	1.66	1.89	6.21	98.48	19.17	11.71	12.03
63	male	178.0cm	81.0Kg	89cm	93cm	0.96	102mmHg	64mmHg	7.19	4.67	140	30	95.1	146	8	12	48.9	4.88	2	2.57	0.79	7.66	NULL	68	4.2	254	NULL	NULL	0.81	NULL	NULL	NULL	1.69	1.43	4.16	101.7	15.28	14.09	8.72
75	female	158cm	63Kg	89cm	96cm	0.93	135mmHg	69mmHg	7.78	5.33	159	29.8	86.5	207	16	17	41.4	4.28	1.13	2.78	0.73	5.8	5.4	63	8.4	267	113.34	NULL	0.62	NULL	NULL	NULL	4.9	1.8	4.89	124.2	18.84	22.78	14.46
67	male	157cm	62Kg	78cm	91cm	0.86	131mmHg	70mmHg	5.74	4.44	124	27.9	85.1	247	10	17	45.4	4.46	2.03	3.1	0.95	4.78	NULL	72	3.4	285	NULL	NULL	0.67	NULL	NULL	NULL	2.69	1.78	4.78	120.4	19.15	13.21	350
62	male	168.0cm	74.0Kg	96cm	101cm	0.95	132mmHg	87mmHg	6.15	4.58	131	28.6	94.5	287	13	16	47	5.19	1.08	4.38	1.84	5.75	5.9	75	4.3	305	102.39	11.8	0.75	NULL	NULL	NULL	0.682	1.78	4.72	107	16.6	11.9	11.18
60	male	165cm	66.7Kg	81cm	92cm	0.88	101mmHg	55mmHg	4.41	4.96	163	32.9	96.6	150	20	17	50.3	3.46	0.99	3.12	0.56	5.06	5.1	68	5.2	241	104.07	NULL	0.73	4	140	102.4	2.04	1.33	3.88	87.79	15.56	<10.00	12.12
66	male	158cm	66Kg	95cm	97cm	0.98	146mmHg	85mmHg	7.12	5.01	150	29.9	92.2	262	17	19	42.5	5.3	1.6	2.51	0.56	5.9	5.6	57	6.6	239	115.7	NULL	0.62	NULL	NULL	NULL	2.77	1.89	5.41	91.52	16.25	12.17	8.07
79	female	153.0cm	66.0Kg	100cm	98cm	1.02	133mmHg	86mmHg	7.3	4.65	145	31.2	93.1	227	9	15	48.1	4.84	1.06	1.15	1.9	4.8	5.3	57	6.1	420	138.56	13.6	0.69	NULL	NULL	103.4	2.93	2.09	6.47	72.43	13.84	14.8	83
81	female	154.0cm	54.0Kg	82cm	94cm	0.87	149mmHg	84mmHg	3.09	5.32	162	30.5	88.7	148	30	31	47.8	5.08	1.51	2.27	1.9	5.14	6	64	5.2	258	96.62	11.3	0.76	NULL	NULL	NULL	2	1.77	4.82	107	17.1	12.3	17.14
61	male	168cm	76.8Kg	93cm	106cm	0.88	133mmHg	76mmHg	4.21	5	147	29.4	90	138	20	26	47.4	3.69	1.48	3.34	0.68	8.53	5.2	90	5.1	482	78.44	NULL	0.87	4.24	143.2	NULL	1.65	1.28	3.94	78.1	15	<10.00	18.07
60	male	183cm	93Kg	102cm	107cm	0.95	110mmHg	76mmHg	6.75	4.77	144	30.2	92.2	289	16	28	47.1	5.22	2.63	3.48	1.12	5.59	NULL	86	4.3	357	NULL	NULL	0.72	NULL	NULL	NULL	3.58	1.48	4.66	106.3	19.37	12.09	6.75
66	male	162.0cm	66.0Kg	94cm	103cm	0.91	116mmHg	78mmHg	3.98	4.49	134	29.8	89.3	221	28	21	47.6	3.95	1.02	3.62	2.42	5.72	5.9	84	4.3	399	NULL	10.6	0.85	4.2	142	NULL	1.33	1.88	5.59	100.7	19.95	<10.00	<9.00
61	male	160.0cm	71.0Kg	93cm	100cm	0.93	123mmHg	79mmHg	7.8	5.07	169	33.3	100	150	53	31	49.7	9.01	0.87	3.63	1.18	9.13	6.4	71	4.2	261	NULL	NULL	0.94	NULL	NULL	NULL	1.44	1.97	5.23	82.63	12.4	13.54	16.51
61	male	164cm	61Kg	79cm	94cm	0.84	104mmHg	75mmHg	5.72	4.72	156	33.1	97.7	123	16	16	44.9	4.57	0.82	2.99	0.53	5.4	NULL	44	5.6	268	NULL	83.9	0.64	NULL	NULL	NULL	3.62	1.78	5.17	88.48	16.65	<10.00	12.18
62	male	161cm	56Kg	80cm	91cm	0.88	112mmHg	65mmHg	6.8	4.24	134	31.6	102.1	147	20	18	45.6	4.56	1.63	2.83	0.82	5.78	NULL	56	5	283	NULL	NULL	0.79	NULL	NULL	NULL	0.95	1.89	4.93	84.19	16.09	35.23	10.79
65	male	160.0cm	52.0Kg	72cm	84cm	0.86	126mmHg	71mmHg	5.61	5	149	29.8	91.4	284	12	16	43.3	3.94	1.65	2.2	2.05	5.08	6.5	67	4.4	384	87.65	11.4	0.84	NULL	NULL	NULL	3.75	2.31	4.83	104	15.53	12.85	<9.00
61	male	168cm	54Kg	82cm	87cm	0.94	125mmHg	66mmHg	10.31	4.87	152	31.2	97.7	189	45	36	48	3.46	1.1	2.82	0.97	5	4.4	50	3.7	244	123.37	NULL	0.67	NULL	NULL	NULL	2.27	1.5	4.28	114.8	20.7	<10.00	6.04
63	female	164.0cm	60.0Kg	74cm	94cm	0.79	130mmHg	76mmHg	5.34	4.69	130	27.7	87.8	256	15	16	49.2	4.62	1.7	3.87	1.84	5.37	5.6	84	4.4	368	NULL	11.4	0.79	NULL	NULL	103.8	4.53	1.94	5.22	82.69	14.11	11.5	<9.00
65	male	163cm	66Kg	85cm	94cm	0.90	145mmHg	88mmHg	6.24	4.97	156	31.4	97.6	273	16	18	51.3	4.42	1.35	4.17	1.03	5.86	NULL	56	7.3	251	NULL	16.3	0.83	NULL	NULL	NULL	1.58	1.66	4.3	87.85	14.63	<10.00	10.07
64	male	173cm	72.5Kg	87cm	93cm	0.94	113mmHg	74mmHg	5.78	3.91	129	33	101.3	211	17	21	48.9	4.64	2.09	2.34	1.05	4.68	NULL	51	6.5	332	NULL	NULL	0.63	NULL	NULL	97.2	2.26	2.15	5.21	115.7	18.82	<10.00	19.18
62	male	175cm	84Kg	98cm	99cm	0.99	115mmHg	69mmHg	4.3	5.03	174	34.6	103.6	241	23	27	48.8	6.93	1.1	3.14	1.11	5.62	5.8	92	4.7	383	88.69	12.8	0.86	NULL	NULL	NULL	1.83	1.59	5.01	80.9	16.6	<10.00	15.97
64	male	163cm	49.3Kg	68cm	84cm	0.81	103mmHg	69mmHg	5.4	5.09	161	31.6	98.2	122	30	28	51.3	5.23	1.17	3.16	0.84	5.22	NULL	91	7	381	NULL	NULL	1.05	NULL	NULL	NULL	2.26	1.45	4.05	87.03	18.8	12.37	473.3
64	male	163cm	65.8Kg	85cm	92cm	0.92	154mmHg	83mmHg	3.7	4.78	143	29.9	91.6	145	8	15	49.8	4.31	1.48	3.52	0.56	15.54	5.2	60	4.7	272	117	11.7	0.67	NULL	NULL	NULL	1.62	1.19	3.78	80.17	15.93	<10.00	12.08
63	male	158cm	65Kg	82cm	96cm	0.85	126mmHg	76mmHg	5.2	4.78	139	29.1	86.6	235	31	28	45.2	4.45	1.65	4.48	2	10.73	5.4	75	4.7	384	109.07	13.2	0.75	NULL	NULL	NULL	1.75	1.88	5.93	85.81	16.95	11.2	8.91
64	male	163cm	53Kg	71cm	88cm	0.81	112mmHg	61mmHg	6.16	5.22	165	31.6	94.6	145	134	64	50	4.93	1.55	3.4	0.7	5.29	NULL	60	5.1	294	NULL	NULL	0.75	NULL	NULL	102.1	3.39	1.86	5.4	101.1	16.46	15.32	13.35
84	male	159.0cm	61.0Kg	89cm	96cm	0.93	141mmHg	72mmHg	4.58	5.37	154	28.7	84.9	290	15	17	53.2	4.09	1.22	4.09	0.59	7.42	5.2	110	3.7	432	79.96	NULL	0.98	NULL	NULL	NULL	2.37	1.69	6.01	81.7	17.9	<10.00	12.18
64	male	173cm	64.8Kg	79cm	97cm	0.81	133mmHg	87mmHg	9.33	4.17	137	32.9	97.8	136	16	20	47.6	3.92	1.48	2.3	1.21	5	NULL	74	3	289	92.64	12.3	0.97	NULL	NULL	101.2	0.016	2.55	7.77	159.8	22.9	<10.00	31.77
77	male	166cm	82.7Kg	104cm	102cm	1.02	115mmHg	57mmHg	4.14	4.11	124	30.2	94.6	99	18	22	50.3	3.79	1.97	1.76	0.81	6.08	5.1	82	4.3	307	85.96	NULL	0.78	NULL	NULL	NULL	3.59	1.64	4.93	90	16.6	<10.00	6.75
61	male	165cm	69Kg	87cm	97cm	0.90	117mmHg	64mmHg	5.58	4.84	152	31.4	94	237	72	33	46.5	4.87	1.1	2.24	0.97	8.31	5.6	85	4	409	112.31	NULL	0.8	NULL	NULL	NULL	1.93	1.94	5.72	98.71	18.76	11.47	8.66
76	male	161cm	61Kg	81cm	92cm	0.88	144mmHg	69mmHg	6.24	4.84	148	30.6	92.6	215	12	23	45.3	4.9	1.64	3.06	0.77	7.52	5.1	94	5.2	407	NULL	NULL	0.89	NULL	NULL	NULL	2.41	1.81	5.42	111	18.62	<10.00	19.15
65	male	172cm	61.4Kg	80cm	90cm	0.89	123mmHg	57mmHg	6.61	4.99	144	28.9	90	249	19	25	49.8	6.81	0.99	3.02	0.89	4.76	NULL	65	6.1	325	108.37	NULL	0.71	NULL	NULL	NULL	1.69	1.66	4.56	98.95	17.58	22.68	190.4
66	female	172.0cm	52.0Kg	70cm	95cm	0.74	134mmHg	71mmHg	5.3	5.06	151	29.8	88.7	346	22	23	50.6	4.53	1.6	3.43	0.96	5.85	NULL	87	4.5	327	106.17	NULL	0.6	NULL	NULL	NULL	3.11	2.04	5.73	120	18.87	11.43	16.34
61	female	150.0cm	48.0Kg	72cm	87cm	0.83	130mmHg	77mmHg	6.18	5.25	157	29.9	90.5	242	26	25	48.1	5.71	1.18	4.34	1.82	5.88	5.8	73	4.2	338	104.27	11	0.66	NULL	NULL	NULL	3.52	2.03	5.54	75.51	13.23	11	6.36
76	male	164.0cm	76.0Kg	100cm	103cm	0.97	128mmHg	66mmHg	7.41	4.59	132	28.8	88.2	128	10	20	49.4	5.25	2.19	3.35	1.12	6.67	5.2	48	4.3	207	113.32	NULL	0.68	NULL	NULL	NULL	7.15	1.67	4.61	86.62	13.36	824.9	32.5
61	male	163cm	71Kg	96cm	101cm	0.95	153mmHg	88mmHg	7.79	5.1	145	28.4	88.4	170	21	24	49.1	4.79	1.25	2.54	1.11	6.59	6.2	75	6	272	86.17	12.4	0.69	NULL	NULL	NULL	4.89	1.13	3.29	87.2	17.2	<10.00	11.52
62	male	NULL	NULL	NULL	NULL	NULL	NULL	NULL	4.83	4.39	134	30.5	90.2	239	18	18	48.1	5.39	1.23	2.64	0.65	5.27	5.6	64	7.9	199	101.49	23	0.63	NULL	NULL	NULL	3.47	2.11	5.37	118.2	19.23	18.98	18.51
80	male	155.0cm	74.9Kg	104cm	105cm	0.99	143mmHg	78mmHg	6.85	5.28	167	31.6	100.8	177	31	21	51.9	5.89	1.23	2.97	0.99	5.99	5.7	68	4.5	296	NULL	NULL	0.72	NULL	NULL	NULL	2.15	1.75	5.16	86.81	16.7	<10.00	24.41
78	male	163cm	59.7Kg	86cm	94cm	0.91	153mmHg	75mmHg	6.45	4.38	136	31.1	95.9	169	23	20	44.4	5.99	2.11	2.5	1.04	5.38	NULL	50	4.5	256	107.95	NULL	0.69	NULL	NULL	NULL	2.5	1.52	4.62	103	17.8	<10.00	8.08
77	male	166.0cm	67.0Kg	85cm	90cm	0.94	146mmHg	81mmHg	4.8	4.67	139	29.8	94.6	208	13	20	51.4	4.7	1.66	3.04	1.05	5.36	5.5	79	3.7	307	71.31	NULL	0.86	NULL	NULL	NULL	3.25	1.61	4.3	90.1	14.2	12.02	9.38
76	female	138.0cm	51.0Kg	94cm	90cm	1.04	146mmHg	69mmHg	5.67	5.08	153	30.1	92.3	219	46	32	50.5	5.75	1.31	3.31	1.83	12.4	5.6	66	5.3	315	115.77	15.2	0.84	NULL	NULL	NULL	2.11	2.23	6.16	111.6	17.44	13.1	12.19
81	male	159.0cm	59.0Kg	89cm	92cm	0.97	129mmHg	80mmHg	7.39	5.39	142	26.3	85	171	13	17	46.3	6.11	1.09	1.99	1.07	5.22	NULL	95	5.2	284	85.91	18.5	0.91	NULL	NULL	NULL	1.33	0.89	4.8	73.5	20.6	17.87	9.62
79	male	164cm	68Kg	90cm	90cm	1.00	139mmHg	66mmHg	5.91	5.11	139	27.2	87.3	296	15	21	48.2	4.26	1.37	3.62	1.03	12.64	5.3	93	5.5	343	81.6	NULL	0.96	NULL	NULL	NULL	2.03	1.85	5.09	104	17.01	14.63	11.81
63	male	165.0cm	65.0Kg	84cm	96cm	0.87	119mmHg	72mmHg	4.26	4.65	142	30.5	91.8	178	13	17	48.3	3.75	1.9	1.98	2	5.51	5.8	82	8.7	378	104.83	14.5	0.85	NULL	NULL	NULL	2.01	1.78	5.65	93.38	15.81	11.3	<9.00
78	male	166.0cm	67.0Kg	95cm	91cm	1.04	154mmHg	65mmHg	9.44	4.39	140	31.9	97.5	169	44	37	50.9	4.87	1.45	2.18	0.78	4.76	NULL	86	9.4	441	NULL	NULL	0.75	NULL	NULL	NULL	1.82	1.8	5.62	130.7	21.1	76.99	8.82
73	male	158cm	56.3Kg	77cm	89cm	0.87	137mmHg	87mmHg	4.75	5.45	178	32.7	97.1	166	69	38	50.5	5.26	1.18	1.7	0.7	5.18	5.4	72	7.2	277	NULL	16.4	0.84	NULL	NULL	NULL	2.21	1.51	5.32	94.17	23.56	<10.00	19.43
70	male	159.0cm	55.0Kg	76cm	86cm	0.88	154mmHg	87mmHg	6.23	5.36	161	30	92.2	293	29	27	51	5.79	1.19	2.88	0.76	9.34	NULL	53	6.4	308	NULL	NULL	0.61	NULL	NULL	NULL	2	1.81	5.85	86.67	17.74	17.74	29.23
84	male	168.0cm	64.0Kg	85cm	94cm	0.90	91mmHg	69mmHg	5.25	5.18	160	30.9	94.4	323	30	21	48.8	6.18	1.22	2.01	2.18	4.56	5.4	106	4.1	393	NULL	NULL	1.07	NULL	NULL	NULL	2.75	1.81	4.8	105.4	14.49	17.2	<9.00
60	male	166.0cm	73.0Kg	87cm	98cm	0.89	142mmHg	88mmHg	5.65	5.88	152	25.9	83.5	212	20	19	52.4	4.68	1	2.74	2.03	4.58	5.5	50	4.1	287	NULL	NULL	0.72	NULL	NULL	NULL	2.13	1.65	4.46	96.68	15.03	12.6	8.78
63	male	158cm	62.4Kg	81cm	92cm	0.88	114mmHg	77mmHg	5.62	5.9	175	29.7	88	183	37	30	50.4	4.36	1.4	2.88	0.77	5.14	5	80	4.5	260	NULL	17.9	0.74	NULL	NULL	NULL	1.98	1.76	5.33	124.2	22.58	<10.00	11.37
75	male	158cm	68Kg	93cm	98cm	0.95	128mmHg	69mmHg	7.77	5.51	162	29.4	90.6	284	30	20	50.5	4.78	0.91	2.1	0.92	4.75	5.4	84	4.8	359	112.34	NULL	0.93	NULL	NULL	NULL	2.99	1.98	5.64	92.43	17.15	12.85	12.95
67	male	172cm	77Kg	92cm	97cm	0.95	127mmHg	69mmHg	7.44	5.81	167	28.7	88.5	255	43	25	49.2	5.89	1.5	1.91	0.94	5.78	6	86	5.5	356	NULL	NULL	0.78	NULL	NULL	NULL	1.66	2.06	5.17	91.88	15.73	<10.00	10.89
75	male	164.0cm	69.0Kg	91cm	94cm	0.97	117mmHg	61mmHg	4.94	4.45	140	31.5	95.7	144	19	20	48	4.57	1.27	2.41	0.81	5.81	6	74	7.6	257	75.04	14.9	0.78	NULL	NULL	102.7	2.09	2.02	4.76	110	17.1	<10.00	10.1
67	female	153.0cm	67.0Kg	98cm	97cm	1.01	167mmHg	97mmHg	5.24	4.2	140	33.3	98.8	171	19	22	47.3	4.68	1.72	4.1	1.81	5.1	5.6	83	3.4	398	107.75	29.7	0.76	NULL	NULL	NULL	2.3	1.72	4.88	80.5	14.4	14.05	13.5
82	male	170cm	54Kg	71cm	93cm	0.76	128mmHg	67mmHg	5	4.71	124	26.3	83.7	186	19	22	48.3	3.75	2.02	1.57	1.08	7.33	NULL	76	3.8	297	NULL	16.4	0.85	NULL	NULL	NULL	2.81	1.87	5.43	128.5	24.13	16.09	16.23
61	male	172cm	85Kg	93cm	102cm	0.91	137mmHg	87mmHg	7.13	4.83	155	32.1	97.9	156	90	43	47.2	4.4	0.8	3.47	1.2	5.26	6	65	3.2	282	95.5	NULL	0.77	NULL	NULL	NULL	6.09	1.78	4.51	80.17	13.95	<10.00	16.92
66	male	170.0cm	74.0Kg	92cm	99cm	0.93	116mmHg	71mmHg	6.47	4.36	130	29.8	93.3	241	22	21	47	4.61	1.11	1.91	1.99	4.66	5.2	95	5.5	397	80.09	14.1	0.85	NULL	NULL	NULL	2.24	1.55	4.83	86.1	16.8	<10.00	48.02
63	male	173cm	66Kg	81cm	98cm	0.83	140mmHg	86mmHg	6.06	5.93	118	19.9	61.2	195	11	18	43.7	4.23	2	2.73	0.93	6.17	5.5	81	5.4	368	NULL	13.1	NULL	NULL	NULL	NULL	1.88	1.57	5.01	107.8	19.26	<10.00	21.48
82	male	NULL	NULL	NULL	NULL	NULL	NULL	NULL	5.79	4.6	149	32.4	98.9	125	26	23	50.4	2.42	1.04	2.97	0.79	5.62	5.4	61	5.3	275	NULL	19.5	0.71	NULL	NULL	101.9	1.96	1.7	4.57	100.7	16.68	<10.00	6.32
67	male	177cm	82Kg	92cm	104cm	0.88	139mmHg	89mmHg	5.9	3.6	118	32.8	98.9	220	54	46	41.4	4.24	0.67	3.69	1.01	5.97	5.9	57	3.1	295	101.96	19	0.76	NULL	NULL	NULL	4.87	2.06	4.86	98.97	16.82	12.31	12.55
60	male	173cm	82.7Kg	99cm	102cm	0.97	128mmHg	80mmHg	6.58	4.81	149	31	95	136	43	46	47.2	5.48	2.09	2.6	1.16	4.59	5.5	107	3.5	314	66.03	NULL	1.21	NULL	NULL	NULL	1.81	1.95	5.46	91.68	20.46	<10.00	12.86
65	male	166cm	72Kg	88cm	96cm	0.92	130mmHg	75mmHg	4.25	5.86	162	27.6	85.3	187	18	21	52.5	4.3	1.34	2.34	0.96	9.97	5.5	82	5.1	327	104.09	NULL	0.83	NULL	NULL	NULL	1.84	1.79	4.82	90.47	17.75	<10.00	28.52
64	male	163.0cm	64.0Kg	85cm	92cm	0.92	130mmHg	84mmHg	5.69	5.76	177	30.7	93.4	129	47	30	49.8	5.76	1.06	3.19	0.38	4.2	5.3	60	5.6	194	NULL	15	0.52	NULL	NULL	NULL	2.97	1.57	4.32	83.37	16.84	<10.00	11.91
71	male	159cm	73Kg	97cm	99cm	0.98	139mmHg	82mmHg	5.32	4.99	163	32.7	98.6	281	37	21	46.2	6.28	1.24	2.71	0.54	5.23	5.7	65	5.8	396	118.15	NULL	0.65	NULL	NULL	NULL	1.61	1.93	5.72	95.56	17.54	<10.00	16.57
78	male	167cm	60.3Kg	80cm	72cm	1.11	115mmHg	62mmHg	6.06	5.39	165	30.6	90.7	215	29	23	47	5.55	1.19	4.09	0.81	5.59	NULL	78	4.6	326	NULL	NULL	0.99	NULL	NULL	NULL	3.19	1.54	4.78	106	19.5	<10.00	38.02
93	male	168cm	56Kg	83cm	94cm	0.88	149mmHg	69mmHg	4.24	4.84	147	30.4	88.4	210	6	12	50.1	3.19	1.01	2.12	2.03	5.75	5.6	99	3.9	633	NULL	NULL	0.98	NULL	NULL	NULL	3	1.46	5.35	77.63	20.46	11.5	<5.00
62	male	173cm	80Kg	100cm	102cm	0.98	128mmHg	87mmHg	7.26	4.88	176	36.1	105.5	160	14	23	50.2	6.07	1.46	2.02	0.55	6.23	5.6	60	3.1	266	118.66	18.5	0.71	NULL	NULL	NULL	3.05	1.76	4.86	84.39	16.69	<10.00	28.74
80	male	160cm	38.8Kg	66cm	82cm	0.80	131mmHg	74mmHg	5.72	4.61	133	28.9	87.6	219	14	23	45.3	6.63	1.66	2.7	1.11	5.26	5.7	64	3.6	335	NULL	NULL	0.72	NULL	NULL	NULL	0.966	1.42	3.98	109.6	17.51	11.56	79
76	male	164cm	58.7Kg	77cm	90cm	0.86	128mmHg	56mmHg	4.54	4.75	145	30.5	93.5	239	11	14	52	5.73	2.2	1.18	1.07	6.75	6	76	3.9	350	NULL	14.1	0.85	NULL	NULL	NULL	1.35	1.21	4.44	63.79	12.26	<10.00	5.84
75	female	162.0cm	74.0Kg	76cm	113cm	0.67	125mmHg	64mmHg	6.01	5.18	164	31.7	96.1	283	21	25	46.5	5.67	2.08	2.62	0.86	7.49	5.3	70	4.1	249	NULL	NULL	0.74	NULL	NULL	NULL	3	1.61	4.54	81.31	13.28	13.21	10.49
61	male	178cm	87Kg	88cm	104cm	0.85	133mmHg	69mmHg	4.48	3.97	89	22.4	79.6	305	27	24	45	3.69	1.91	2.09	0.55	6	5.2	85	4.8	306	75.12	NULL	0.94	NULL	NULL	NULL	3.14	1.55	4.13	92.95	18.07	<10.00	12.39
67	male	165cm	72.3Kg	92cm	93cm	0.99	132mmHg	65mmHg	8.23	5.11	157	30.7	92.4	277	31	20	51	5.29	0.89	2.45	0.81	4.94	5.7	70	3.8	315	102.62	NULL	0.72	NULL	NULL	NULL	0.856	1.46	4.53	91.7	15	12.34	10.27
70	male	174.0cm	62.0Kg	76cm	90cm	0.84	86mmHg	57mmHg	3.48	4.56	139	30.5	95.2	145	15	20	47.5	6.74	1.67	3.26	0.79	5.26	5.6	52	5.1	341	123.51	NULL	0.66	NULL	NULL	99.9	2.34	2.21	5.64	106.3	16.2	11.44	32.05
72	male	165.0cm	70.0Kg	91cm	95cm	0.96	149mmHg	86mmHg	12.78	4.93	140	28.4	88.4	179	16	22	51.8	5.1	1.91	3.83	0.94	5.79	5.3	83	5.7	293	81.78	18.7	0.78	NULL	NULL	NULL	3.17	1.62	4.76	98.5	18.4	17.1	11.59
67	male	166cm	64Kg	74cm	92cm	0.80	108mmHg	67mmHg	4.03	4.25	135	31.8	102.8	134	41	41	46	6.02	1.19	3.19	0.91	4.54	NULL	68	7	516	NULL	19.8	0.75	NULL	NULL	NULL	1.34	1.89	5.04	101.9	18.1	<10.00	5.26
64	male	162cm	58Kg	78cm	88cm	0.89	132mmHg	73mmHg	2.77	4.07	137	33.7	96.3	166	23	19	51.5	3.88	1	3.07	1.03	5.57	5.5	106	3.4	500	74.73	NULL	0.93	NULL	NULL	NULL	4.14	2.21	5.2	122	17.4	17.77	11.6
60	male	171.0cm	70.0Kg	88cm	100cm	0.88	132mmHg	89mmHg	8.03	5.65	176	31.2	88.7	285	48	34	47.2	6.79	1.24	2.66	0.48	5.73	5.2	53	4.6	230	NULL	14.4	0.63	NULL	NULL	NULL	2.01	1.23	4.57	82.7	16.16	<10.00	287.2
61	male	167.0cm	67.0Kg	85cm	92cm	0.92	154mmHg	85mmHg	5.61	4.66	140	30	91.4	249	18	38	47.6	4.09	1.65	3.23	0.49	4.62	5.2	67	3	273	106.7	NULL	0.76	4.16	143.1	105.8	2.77	2.24	5.63	101.2	17.01	<10.00	96.7
88	male	156cm	64.2Kg	89cm	98cm	0.91	128mmHg	50mmHg	4.18	4.73	132	27.9	88.2	162	7	17	46.7	5.01	1.44	1.23	1.13	5.72	5.9	89	5.2	288	78.54	NULL	1.1	NULL	NULL	99.1	3.98	2.31	6.14	107.3	18.76	<10.00	59.86
79	male	165.0cm	60.0Kg	86cm	92cm	0.93	149mmHg	86mmHg	8.99	5.19	169	32.6	90.2	234	24	28	44.5	4.84	0.72	4.25	1.93	4.99	5.5	88	6	434	NULL	16.7	0.74	4.03	141.7	NULL	1.63	1.52	4.26	121	19.4	13.28	18.96
69	male	164cm	77Kg	94cm	102cm	0.92	124mmHg	65mmHg	7.91	5.11	158	30.9	91.8	233	15	17	49.5	4.92	0.94	3.58	0.66	5.92	5.4	47	6	201	127.68	NULL	0.61	NULL	NULL	NULL	1.41	2.09	5.59	101	18.1	11.88	12.88
64	male	163cm	63.6Kg	81cm	93cm	0.87	131mmHg	78mmHg	4.17	5.11	158	30.9	94.7	190	43	24	51.1	4.72	1.2	3.98	0.63	4.84	5.3	70	2.8	359	124.68	NULL	0.83	NULL	NULL	NULL	1.23	1.62	4.93	113	20.9	12.85	11.38
76	male	158cm	56Kg	84cm	86cm	0.98	143mmHg	63mmHg	3.41	4.25	139	32.7	96.7	275	12	21	45.6	4.32	2.43	1.91	1.13	8.12	5.1	83	4.8	369	110.05	16.1	0.72	NULL	NULL	NULL	0.795	1.61	5.6	80.08	19.86	15.29	8.47
65	male	171cm	57Kg	68cm	85cm	0.80	113mmHg	64mmHg	4.52	4.29	119	27.7	84.1	118	16	20	46.3	5.88	2	3.58	1.13	6.02	NULL	64	8.1	262	79.93	NULL	0.85	NULL	NULL	NULL	2.96	1.47	4.4	95.75	15.66	12.54	9.95
66	male	160.0cm	55.0Kg	78cm	91cm	0.86	112mmHg	78mmHg	5.29	4.37	131	30	92.9	213	23	22	45.6	4.9	1.4	2.6	0.99	12.64	NULL	53	3.8	238	NULL	12.4	0.6	NULL	NULL	NULL	3.72	1.64	4.23	89.17	15.21	13.84	13.63
70	male	165.0cm	55.0Kg	78cm	84cm	0.93	122mmHg	70mmHg	6.69	5.07	161	31.8	93.9	165	26	23	43.4	5.14	0.96	2.81	0.72	5.17	5.6	93	6.6	339	83.92	NULL	0.76	NULL	NULL	NULL	2.46	1.25	4.15	83.07	16.76	16.99	15.18
77	male	167.0cm	68.0Kg	91cm	102cm	0.89	155mmHg	79mmHg	5.85	4.59	137	29.8	92.2	141	35	34	45.7	4.35	2.15	4.16	0.64	11.26	NULL	47	3.3	287	NULL	NULL	0.69	4.03	143.3	102.6	2.04	2.13	5.62	107	20.27	16.01	<9.00
72	male	160cm	68.9Kg	90cm	101cm	0.89	140mmHg	84mmHg	5.46	5.09	158	31	91.4	178	17	20	50.5	5.9	1.39	3.45	1.19	6.52	5.3	39	5.9	232	NULL	NULL	0.68	NULL	NULL	NULL	0.479	1.88	5.44	91.21	17.83	<10.00	17.34
68	male	158cm	67.4Kg	87cm	89cm	0.98	117mmHg	60mmHg	6.93	4.43	129	29.1	90.3	233	19	18	47.2	4.81	1.27	3.39	0.98	5.39	5.5	81	3.5	366	107.9	NULL	0.79	4.51	143.9	NULL	3.29	1.58	5.36	87.34	17.6	<10.00	10.74
70	male	158.0cm	75.0Kg	90cm	102cm	0.88	119mmHg	80mmHg	3.97	4.38	136	31.1	95.7	245	43	67	45.2	3.28	1.14	1.35	0.65	5.27	5.5	48	4.1	185	NULL	12.3	0.64	NULL	NULL	NULL	2.75	2.35	5.59	114.2	16.66	<10.00	14.85
61	male	172cm	74Kg	79cm	102cm	0.77	129mmHg	74mmHg	3.89	4.71	140	29.7	92.8	178	29	33	49.6	5.17	2.14	3.02	1.07	5.06	5.8	58	4	261	92.53	NULL	0.92	NULL	NULL	NULL	3.03	1.55	4.02	86.17	15.98	10.61	14.85
62	male	166.0cm	56.0Kg	75cm	91cm	0.82	110mmHg	74mmHg	5.64	5.97	126	21.1	65.3	332	13	21	53.2	4.53	1.92	4	1.15	4.69	5.6	60	3.9	266	NULL	NULL	0.72	NULL	NULL	NULL	3.19	1.71	4.2	107	15.6	13.95	14.78
85	male	155.0cm	56.0Kg	83cm	92cm	0.90	132mmHg	60mmHg	5.55	5.14	153	29.8	90.7	147	15	18	45.2	4.35	0.98	3.17	1.05	5.05	4.8	64	5.5	263	103.66	21.6	0.79	NULL	NULL	NULL	1.37	1.52	4.95	74.5	14	10.65	<5.00
65	male	168.0cm	61.0Kg	79cm	91cm	0.87	131mmHg	72mmHg	4.72	4.44	136	30.6	91.2	290	19	19	43.6	5.54	1.75	3.54	1.02	5.53	9.8	69	2.9	333	100.17	14.4	0.78	NULL	NULL	NULL	5.25	1.8	4.52	98.2	15.7	<10.00	17.17
61	female	156.0cm	36.0Kg	58cm	77cm	0.75	110mmHg	72mmHg	6.48	4.78	139	29.1	92.7	330	12	18	53.1	5.5	2.15	2.85	0.55	4.25	NULL	60	4.7	256	101.67	11.2	0.61	NULL	NULL	NULL	6.76	1.01	3.62	73.78	15.44	<10.00	9.37
64	male	171cm	82Kg	92cm	100cm	0.92	115mmHg	72mmHg	5.11	5.23	170	32.5	100.2	262	32	32	51.7	4.85	1.27	4.2	1.09	5.48	5.3	47	4.1	316	NULL	NULL	0.71	NULL	NULL	NULL	2.22	1.34	4.4	79.79	15.87	<10.00	9.27
65	male	165cm	69.1Kg	88cm	94cm	0.94	117mmHg	73mmHg	5.29	4.98	168	33.7	101	114	55	33	49.9	3.85	0.88	2.83	1.02	4.62	5.4	97	5.7	383	74.87	16.3	1.17	NULL	NULL	NULL	2.87	2.75	5.86	131.5	15.7	<10.00	20.43
62	male	171cm	67.5Kg	92cm	94cm	0.98	133mmHg	84mmHg	5.05	5.25	153	29.1	89.5	149	12	22	51.7	3.46	1.99	2.62	0.92	5.46	5.5	96	5.1	226	85.43	NULL	0.81	NULL	NULL	NULL	1.21	1.65	5.59	106	22	11.09	14
60	male	174cm	76.1Kg	93cm	95cm	0.98	127mmHg	66mmHg	5.52	5.39	161	29.9	90.5	178	25	22	55.9	4.97	1.33	2.88	1.05	5.24	5.4	89	5.4	299	100.43	NULL	0.87	NULL	NULL	NULL	2.44	2.08	5.53	120	20.1	<10.00	11.28
77	male	164cm	64Kg	87cm	99cm	0.88	119mmHg	52mmHg	6.38	5.18	157	30.3	91.3	195	40	26	48.4	4.08	0.97	2.28	1	5.26	5.6	70	3.6	305	NULL	NULL	0.71	NULL	NULL	NULL	2.63	1.73	5.07	96.87	17.62	72.71	24.09
80	male	164cm	70.8Kg	87cm	97cm	0.90	144mmHg	69mmHg	9.27	5.74	171	29.8	92.3	371	21	15	54.7	4.6	1.08	3.67	1.17	7.62	NULL	191	5.5	561	NULL	20.9	1.96	NULL	NULL	NULL	5.79	1.34	3.96	87.92	14.46	<10.00	7.13
66	male	172cm	72Kg	82cm	97cm	0.85	132mmHg	84mmHg	4.9	4.3	126	29.3	92.3	242	17	19	49.1	4.82	1.87	3.2	0.61	5.33	5.3	54	2.9	200	NULL	NULL	0.57	NULL	NULL	NULL	2.36	1.48	5.13	84.6	15.48	10.88	6.56
79	male	155cm	60.4Kg	85cm	93cm	0.91	130mmHg	64mmHg	2.36	3.78	119	31.5	95.5	173	9	16	50.9	4.4	2.01	1.64	0.81	5.59	5.6	86	3.3	463	88.44	NULL	0.89	NULL	NULL	NULL	1.36	2.55	6.23	132	16.09	34.01	18.73
67	male	171.0cm	69.0Kg	91cm	98cm	0.93	145mmHg	78mmHg	5.58	4.5	142	31.6	98.7	247	14	18	49.4	4.55	1.91	3.78	0.69	4.8	5.2	56	4.1	319	129.3	NULL	0.64	3.88	142.5	NULL	6.32	1.79	4.86	89	13.9	11.1	6.4
77	male	158cm	58Kg	84cm	92cm	0.91	101mmHg	64mmHg	6.55	4.7	151	32.1	94.3	227	72	48	48.4	4.72	1.1	1.78	1.03	4.94	5.4	54	3.3	170	100.2	NULL	0.79	NULL	NULL	NULL	0.033	1.52	4.93	104.8	21.47	13.48	12.44
72	male	169cm	79.2Kg	96cm	105cm	0.91	154mmHg	82mmHg	7.49	5.37	160	29.8	91.1	238	33	21	47	4.66	0.88	3.36	0.77	5.08	5.6	71	4.2	327	110.78	16.3	0.71	NULL	NULL	NULL	2.09	1.76	4.78	104.7	18.16	211.1	12.99
60	male	174cm	67.7Kg	83cm	94cm	0.88	114mmHg	70mmHg	6.57	4.59	119	25.9	83.9	247	12	13	46.6	4.97	1.52	5.7	1.16	8.88	5.1	67	3.6	314	NULL	NULL	0.78	NULL	NULL	NULL	0.059	1.68	5.22	116	20.4	<10.00	5.9
81	male	172cm	67Kg	88cm	99cm	0.89	164mmHg	71mmHg	3.33	4.86	148	30.5	93	146	11	21	47.8	4.52	2.11	2.85	0.78	5.4	NULL	68	4.7	314	93.01	NULL	0.74	NULL	NULL	NULL	4.01	1.62	4.73	82.84	15.16	<10.00	10.86
69	male	160cm	71Kg	90cm	100cm	0.90	133mmHg	88mmHg	5.9	5.4	156	28.9	90.9	301	27	20	52	4.4	1.03	4.29	1.19	5.2	NULL	66	5	328	NULL	NULL	0.85	NULL	NULL	NULL	2.61	1.62	4.71	118.2	20.39	872.3	10.58
66	male	165.0cm	50.1Kg	64cm	85cm	0.75	111mmHg	70mmHg	5.98	6.62	140	21.1	68	207	65	29	52.5	3.93	0.84	2.65	0.69	5.61	5	47	3.9	328	NULL	NULL	0.69	4.27	141.9	98.8	2.24	1.81	5.12	103.7	14.39	30.51	7.17
65	male	167cm	58.7Kg	77cm	89cm	0.87	116mmHg	60mmHg	6.5	4.97	153	30.8	90.5	279	43	22	47.7	6.3	1.34	3.14	0.95	5.04	5.7	64	4.6	323	NULL	NULL	0.96	NULL	NULL	NULL	4.8	2.43	6.1	97.31	20.5	518.4	7.57
68	male	176.0cm	72.0Kg	84cm	98cm	0.86	128mmHg	77mmHg	6.33	5.35	164	30.7	93.8	343	65	23	43.7	6.71	0.95	2.54	2.63	5.72	5.2	69	4.9	295	79.96	13.1	0.99	NULL	NULL	NULL	4.65	1.46	4.35	89.6	13.8	106.1	<9.00
78	male	161cm	66.1Kg	91cm	91cm	1.00	150mmHg	79mmHg	6.75	3.84	125	32.6	102.9	210	26	27	49.1	4.19	1.68	3.35	1.16	8.19	NULL	68	5.5	198	93.66	NULL	0.75	NULL	NULL	NULL	1.92	2.04	5.29	125	18.9	10.39	8.59
73	female	169cm	52Kg	68cm	85cm	0.80	123mmHg	75mmHg	6.73	5.49	157	28.6	91.6	151	20	18	50.5	4.18	0.94	3.05	1	9.66	NULL	50	5.7	250	NULL	10.5	0.72	NULL	NULL	NULL	6.34	1.96	5.81	106.9	17.21	<10.00	31.34
62	male	164cm	70Kg	86cm	94cm	0.91	126mmHg	71mmHg	5.45	4.14	140	33.8	103.4	167	27	22	48	6.28	1.34	2.96	1.18	4.51	5.3	96	5	495	84.83	NULL	0.96	NULL	NULL	101.8	2.96	1.94	4.97	97.45	17.16	47.56	9.92
72	male	165cm	69.6Kg	91cm	97cm	0.94	136mmHg	83mmHg	7.1	4.32	133	30.8	94.7	58	32	27	45.6	4.42	2.51	3.44	1.23	5.19	NULL	105	3.3	415	70.46	15.5	0.93	NULL	NULL	NULL	1.2	2.12	5.59	127	19.6	672.7	9.91
60	male	169.0cm	64.0Kg	86cm	94cm	0.91	129mmHg	88mmHg	4.91	4.89	156	31.9	96.9	156	22	24	48.5	4.87	1.2	2.41	10.09	7.92	5.8	71	4.1	375	NULL	11.2	0.88	NULL	NULL	NULL	2.96	1.31	4.46	70.21	13.53	108.8	13.58
85	male	171cm	57.9Kg	80cm	94cm	0.85	111mmHg	61mmHg	4.34	4.67	151	32.3	102.1	196	15	22	48.5	4.86	1.62	3.44	0.92	5.28	5.6	69	5.9	232	NULL	NULL	0.71	NULL	NULL	NULL	4.2	1.91	4.57	91.93	15.55	<10.00	8.11
61	female	163.0cm	58.0Kg	79cm	89cm	0.89	114mmHg	53mmHg	4.97	5.47	162	29.6	89.2	245	15	17	44.9	4.57	1.83	3.26	1.85	4.64	5.5	73	5.3	469	NULL	12.7	0.75	NULL	NULL	NULL	2.25	2	5.59	99.9	19.46	38.2	12.6
63	male	168cm	76Kg	91cm	102cm	0.89	126mmHg	73mmHg	9.49	5.09	151	29.7	89.8	187	38	23	51	5.05	1.17	2.61	0.71	5.49	5.4	69	3.6	236	103.69	NULL	0.67	NULL	NULL	NULL	4.02	1.7	4.69	81.6	17.1	137.2	73.91
67	male	163.0cm	66.0Kg	90cm	91cm	0.99	141mmHg	80mmHg	6.55	4.12	129	31.3	95.6	271	17	18	45.2	4.62	1.21	2.96	2.18	5.25	5.9	84	4.3	380	NULL	NULL	0.94	NULL	NULL	NULL	2.2	1.64	5.37	83.01	15.95	11.6	9.24
81	male	167cm	81.9Kg	99cm	107cm	0.93	128mmHg	82mmHg	5.61	4.15	122	29.4	91.8	162	24	25	42.5	5.2	1.19	2.83	0.73	6.3	NULL	65	7.7	308	NULL	NULL	0.74	NULL	NULL	NULL	3.55	1.57	4.59	73.24	13.86	13.76	34.8
73	male	159.0cm	78.0Kg	104cm	105cm	0.99	147mmHg	86mmHg	4.4	4.61	136	29.5	92.4	200	11	23	51	5.35	1.54	1.61	2.12	6.19	5.1	47	5.6	313	NULL	14.3	0.85	NULL	NULL	NULL	2.34	2.25	5.45	108.7	20.1	<10.00	<9.00
66	female	145.0cm	53.0Kg	78cm	93cm	0.84	153mmHg	84mmHg	7.86	4.01	128	31.9	97.3	191	12	17	47.4	5.23	0.97	3.59	2.15	6	5.1	79	18.2	253	NULL	14.7	0.79	3.85	142.6	NULL	2.39	2.51	5.75	98.51	16.76	11.5	<9.00
76	female	155.0cm	50.0Kg	78cm	97cm	0.80	136mmHg	66mmHg	5.78	4.74	149	31.4	94.9	188	34	26	49.1	5.95	1.27	4.24	3.41	5.92	5.4	92	3.8	438	95.81	9.8	0.84	4.45	139.5	NULL	1.41	1.83	6.58	227	34.8	12.1	22.37
69	male	168.0cm	74.0Kg	90cm	100cm	0.90	108mmHg	51mmHg	9.34	4.44	139	31.3	95.9	278	21	19	48.9	6.81	1.68	1.92	2.17	7.12	6.6	65	7.9	280	83.15	12.6	0.97	NULL	NULL	NULL	4.13	1.7	4.16	97.2	14.4	13.1	<9.00
77	male	172cm	88Kg	103cm	107cm	0.96	162mmHg	88mmHg	5.4	5.9	171	29	86.6	201	70	32	52.2	4.72	0.85	2.91	2.87	9.5	5.8	93	5.1	423	77.14	12.4	1.39	NULL	NULL	99.4	0.889	1.62	4.55	85.5	13.9	12.6	<9.00
69	female	150cm	58.3Kg	86cm	89cm	0.97	144mmHg	70mmHg	6.84	4.94	148	30	92.1	136	22	24	47.3	5.28	1.63	1.85	1.16	5.48	5.9	81	4.7	306	91.16	NULL	0.89	NULL	NULL	101.2	1.9	1.88	5.13	91.14	16.59	<10.00	<9.00
67	female	153cm	50Kg	75cm	94cm	0.80	113mmHg	60mmHg	5.56	4.63	143	30.9	97.8	262	21	18	49.9	6.87	1.22	3.51	2.36	5.32	5.8	83	3.6	542	NULL	10.2	0.76	NULL	NULL	NULL	3.2	1.43	4.88	99.69	20.58	77.06	<9.00
87	male	176.0cm	76.0Kg	96cm	97cm	0.99	135mmHg	62mmHg	5.67	5.12	159	31.1	94.3	214	21	19	48.9	3.89	1.31	2.72	2.29	4.85	5.5	91	4.8	422	93.08	17.6	0.82	NULL	NULL	NULL	1.82	1.69	5.26	101	18.7	<10.00	<9.00
75	male	162.0cm	58.0Kg	82cm	95cm	0.86	138mmHg	70mmHg	5.74	4.11	131	31.9	97.8	268	13	16	45.6	4.69	1.69	3.17	0.95	5	5.4	89	3.5	275	96.97	18.9	0.79	NULL	NULL	NULL	4.68	2.02	5.71	134	22.3	<10.00	8.76
65	female	143.0cm	50.0Kg	83cm	89cm	0.93	138mmHg	67mmHg	5.42	4.38	118	26.9	84.7	248	12	17	46.7	7.02	1.14	2.88	1.04	5.08	NULL	46	4.5	241	NULL	NULL	0.71	3.53	139.8	NULL	1.97	1.86	5.06	87.34	15.46	13.73	14.4
63	female	154cm	49Kg	71cm	87cm	0.82	147mmHg	78mmHg	5.56	4.31	135	31.3	97.7	210	19	27	44.9	5.1	1.73	3.28	1.07	4.31	5.4	89	8.9	418	102.57	NULL	0.73	NULL	NULL	NULL	2.11	1.43	4.93	83.09	18.92	18.18	55.35
67	female	159.0cm	61.0Kg	84cm	92cm	0.91	154mmHg	74mmHg	6.53	4.6	133	28.9	83.9	202	62	39	52.1	5.33	1.45	2.81	0.53	5.03	5.3	63	3.9	314	114.94	NULL	0.62	NULL	NULL	NULL	1.53	1.43	4.61	89.2	16.9	14.63	7.63
76	male	166cm	68Kg	89cm	97cm	0.92	134mmHg	75mmHg	4.11	4.88	147	30.1	91	176	18	25	46.1	4.98	1.2	5.5	2.26	5.56	8.4	89	5.7	517	NULL	22.7	0.92	NULL	NULL	NULL	4.66	1.84	5.19	118.7	17.81	<10.00	35.4
83	male	164cm	62Kg	76cm	88cm	0.86	151mmHg	62mmHg	6.56	6.03	174	28.9	90	140	78	38	55.1	5.74	1.33	2.86	1.07	8.27	5.6	65	5.1	410	90.28	NULL	1.03	NULL	NULL	NULL	4.47	1.53	4.47	90.86	17.26	<10.00	18.09
80	male	163.0cm	56.0Kg	77cm	88cm	0.88	135mmHg	71mmHg	6.83	5.19	166	32	97.3	168	20	20	50.4	3.69	0.99	3.06	1.41	12.65	7.8	79	4.5	319	NULL	20.5	1.02	NULL	NULL	NULL	2.72	2.12	6.03	103	15.1	17.88	17.65
74	female	153.0cm	63.0Kg	101cm	90cm	1.12	168mmHg	72mmHg	5.73	5.68	158	27.8	85.2	262	12	18	48.6	4.62	2.3	3.2	0.69	7.73	NULL	71	5.2	230	NULL	NULL	0.6	4.34	142	NULL	NULL	0.65	1.82	23.31	3.32	15.18	11.66
76	male	158cm	43.7Kg	67cm	84cm	0.80	110mmHg	74mmHg	8.43	4.1	130	31.7	95.9	127	6	14	51.4	4.18	1.77	2.41	1.2	4.94	5.5	70	4.2	316	94.99	NULL	0.82	NULL	NULL	NULL	5.75	1.62	4.82	119	22.1	<10.00	14.45
74	male	163cm	49Kg	73cm	89cm	0.82	126mmHg	70mmHg	6.71	5.38	161	29.9	89.4	189	30	25	54	5.28	1.55	2.81	1.22	4.61	5.2	101	5.1	386	85.59	16.3	0.98	NULL	NULL	NULL	1.47	1.79	5.22	97.4	17.8	<10.00	13.92
68	male	148cm	55Kg	86cm	96cm	0.90	121mmHg	90mmHg	9.91	5.13	163	31.8	94	286	36	29	52.3	5.63	1.08	3.36	2.73	4.09	6	97	4.4	482	78.64	26.1	0.86	4.93	141	NULL	1.15	2.02	5.46	103	16	10.32	15.7
75	male	173.0cm	81.0Kg	110cm	98cm	1.12	136mmHg	82mmHg	8.77	5.67	183	32.3	91	267	82	34	47.6	4.5	1.14	3.82	1.17	10.13	5.2	90	5.2	393	97.02	15.6	0.83	NULL	NULL	NULL	2.96	1.39	4.82	87.3	18.3	18.14	17.71
70	male	162.0cm	50.0Kg	79cm	94cm	0.84	119mmHg	59mmHg	5.95	4.08	131	32.1	100	124	12	20	44.1	4.29	0.77	3.44	1.98	5.51	NULL	86	5	376	NULL	10.5	0.84	NULL	NULL	NULL	4	2.61	6.15	107.2	18.6	79.89	17.77
63	male	177.0cm	84.0Kg	99cm	105cm	0.94	145mmHg	88mmHg	5.94	5.06	151	29.8	92.3	127	17	23	48.5	5.8	1.82	3.37	2.23	6.57	6.9	89	7.3	416	NULL	22.5	0.73	NULL	NULL	NULL	1.43	2.38	5.92	112	17.08	11.3	249
68	male	159.0cm	70.0Kg	90cm	97cm	0.93	160mmHg	82mmHg	6.42	5.54	180	32.5	93.5	271	26	24	53.5	4.1	1.27	3.6	0.77	5.1	NULL	55	5	235	113.82	NULL	0.64	NULL	NULL	NULL	1.64	1.74	4.71	101.9	16.09	<10.00	14.33
61	male	175cm	72Kg	94cm	101cm	0.93	125mmHg	61mmHg	4.97	5.47	165	30.2	88.5	304	23	24	44.3	5.48	1.79	3.29	0.44	5.34	5.3	47	7	252	NULL	NULL	0.57	NULL	NULL	NULL	3.9	2.12	4.89	129.9	20.69	<10.00	13.79
65	female	165cm	64Kg	81cm	98cm	0.83	133mmHg	68mmHg	6.38	4.72	150	31.8	95.8	233	10	19	51	5.43	1.84	3.35	0.55	4.86	5.2	53	5.1	241	122.74	NULL	0.68	NULL	NULL	NULL	1.27	1.84	5.64	123	20.9	24.79	14.66
80	female	150cm	55.6Kg	90cm	98cm	0.92	151mmHg	81mmHg	4.48	4.46	134	30	91.9	214	18	25	47.2	4.33	1.93	1.86	1.05	5.95	6	72	3	258	80.34	NULL	0.82	NULL	NULL	NULL	2.16	1.65	5.19	103	18.5	561.7	7.39
72	female	154cm	54Kg	83cm	89cm	0.93	160mmHg	82mmHg	6.45	4.6	145	31.5	95.9	158	10	15	50.4	4.96	1.85	1.71	0.53	6.19	5.1	53	7	203	NULL	NULL	0.55	NULL	NULL	NULL	2.65	1.59	4.88	77.67	15.27	<10.00	7.95
69	female	148cm	48.6Kg	81cm	85cm	0.95	128mmHg	72mmHg	7.94	5.04	157	31.2	96.8	211	107	43	49.1	5.88	1.5	4.47	0.98	5.9	5.6	74	3.9	319	NULL	NULL	0.8	3.9	141.6	NULL	1.84	1.52	5.11	79.58	13.63	109.5	10.61
61	female	156cm	58.8Kg	86cm	90cm	0.96	129mmHg	75mmHg	4.26	4.58	140	30.6	93.4	203	12	23	48.9	3.16	1.95	2.35	1.04	4.7	6.2	74	6.4	425	NULL	NULL	0.82	NULL	NULL	NULL	1.72	2.33	5.98	97.39	14.87	128.3	9.21
60	male	159.0cm	70.0Kg	94cm	96cm	0.98	125mmHg	77mmHg	6.36	5.67	189	33.3	98.2	120	41	30	46.5	4.28	0.81	2.81	1.27	5.67	5.8	96	5.2	271	82.48	12.5	0.84	NULL	NULL	NULL	2.6	1.29	4.9	67.5	18.4	18.09	11.41
61	male	177.0cm	84.0Kg	105cm	108cm	0.97	113mmHg	67mmHg	5.64	5.43	166	30.6	93.9	172	64	45	46.7	6.05	1.25	3.97	2.1	7.59	10.5	64	6.2	400	NULL	21.3	0.77	NULL	NULL	NULL	7.02	1.35	4.94	75.16	13.77	14.78	8.41
64	female	152.0cm	56.0Kg	82cm	93cm	0.88	165mmHg	83mmHg	5.8	5.59	168	30.1	88.7	128	46	33	47.5	5.54	1.25	3.88	1.12	5.63	NULL	56	4.5	246	NULL	8.7	0.68	NULL	NULL	NULL	4.57	1.49	4.82	81.35	13.7	<10.00	7.45
66	female	157cm	62Kg	87cm	103cm	0.84	143mmHg	70mmHg	4.28	5.28	149	28.2	88.3	138	40	29	49.9	4.39	1.14	3.33	1.18	4.7	5.7	82	6.5	301	95.68	NULL	0.87	NULL	NULL	NULL	3.97	1.89	5.88	83.65	15.54	476.9	7.94
63	male	167.0cm	69.0Kg	85cm	100cm	0.85	128mmHg	79mmHg	9.12	4.04	127	31.4	94.1	242	69	25	46.1	5.88	3.27	2.97	0.59	5.38	4.9	45	6.4	221	126.82	NULL	0.68	NULL	NULL	NULL	3.12	1.61	4.45	86.15	15.46	22.3	12.8
64	female	166cm	55.9Kg	71cm	86cm	0.83	97mmHg	60mmHg	5.14	4.18	135	32.3	94.5	239	13	16	45.4	3.37	1.43	2.88	0.53	5.64	4.9	65	3.6	214	103.17	NULL	0.51	NULL	NULL	NULL	3.58	1.61	4.83	115.1	17.62	<10.00	8.2
62	female	158cm	56Kg	77cm	85cm	0.91	112mmHg	71mmHg	3.82	4.21	134	31.8	94.3	169	9	12	46.8	5.61	1.7	4.14	0.98	5.29	5.2	68	4.4	317	101.9	NULL	0.72	NULL	NULL	106.5	3.3	1.41	4.3	88.35	16.15	647.8	6.44
78	male	174cm	76.6Kg	94cm	103cm	0.91	129mmHg	68mmHg	5.84	4.85	155	32	96.1	187	11	19	47.6	3.84	1.54	3.05	0.84	5.11	5.1	78	5.4	294	NULL	NULL	0.89	NULL	NULL	NULL	3.71	1.75	4.63	111.7	17.92	<10.00	10.3
64	female	148.0cm	63.0Kg	85cm	95cm	0.89	145mmHg	86mmHg	6.33	4.72	153	32.4	97.7	263	38	24	51.5	5.32	1.59	2.64	0.91	5.66	5.6	67	4.3	277	92.71	NULL	0.66	NULL	NULL	NULL	3.62	1.42	4.04	96.87	15.76	2336	10.49
69	male	163.0cm	61.0Kg	86cm	92cm	0.93	139mmHg	71mmHg	6.79	4.43	130	29.3	92.6	217	13	20	42.9	6.61	1.3	2.79	0.93	5.87	NULL	66	6.2	320	NULL	NULL	0.75	NULL	NULL	NULL	3.22	2.18	5.53	93.54	15.26	<10.00	18.81
64	male	172cm	73Kg	87cm	97cm	0.90	128mmHg	75mmHg	4.34	4.51	133	29.5	93.6	164	21	19	46.8	5.11	1.15	3.41	0.79	6.67	NULL	68	4.5	360	NULL	NULL	0.7	NULL	NULL	NULL	5.37	1.76	5.43	95.02	17.24	<10.00	43.39
73	male	170cm	66Kg	85cm	98cm	0.87	111mmHg	67mmHg	5.87	4.93	158	32	95.9	188	40	29	47.1	6.83	1.32	2.08	2.27	5.37	5.1	80	4.8	355	100.68	15.5	0.75	NULL	NULL	104	2.38	1.75	5.68	126.7	22.52	15.3	<9.00
83	female	144.0cm	53.0Kg	88cm	99cm	0.89	121mmHg	47mmHg	7.01	4.84	151	31.2	93.8	227	29	29	50.8	5.85	0.77	3.58	2.03	4.96	5.9	67	4.9	416	109.54	NULL	0.86	NULL	NULL	NULL	2.99	1.87	5.2	96.43	15.62	11.6	16.45
64	male	171.0cm	72.0Kg	89cm	98cm	0.91	131mmHg	69mmHg	8.69	5.1	165	32.4	96.3	226	26	19	49.7	6.27	1.39	2.33	2.03	5.15	5.5	81	7.2	326	NULL	14.9	0.87	NULL	NULL	NULL	1.99	2.01	5.19	96.51	14.61	16.1	8.67
64	male	161.0cm	60.0Kg	87cm	96cm	0.91	168mmHg	97mmHg	5.89	5.58	166	29.7	89.8	296	30	20	50.1	6.1	0.93	3.64	2.03	5.81	5.4	88	4.3	360	NULL	17.5	0.71	NULL	NULL	NULL	4.17	2.22	6.19	114.2	17.68	16.86	<9.00
67	female	138.0cm	53.0Kg	87cm	101cm	0.86	171mmHg	65mmHg	9.29	5.43	169	31.1	94.8	288	21	20	53.6	5	1.47	3.1	2.01	5.88	6.5	71	2.8	575	NULL	16.5	0.78	NULL	NULL	NULL	2.13	2.07	4.93	106.4	15.58	231.2	<9.00
65	female	146cm	49Kg	84cm	90cm	0.93	205mmHg	98mmHg	5.68	5.19	162	31.2	93.3	201	80	39	47.7	6.25	1.4	3.03	1.37	5.47	5.6	76	3.7	424	105.48	10.1	0.69	4.04	139.6	101	0.921	1.84	5.33	99.42	15.71	137	102
69	female	148.0cm	60.0Kg	92cm	102cm	0.90	169mmHg	96mmHg	4.7	4.45	132	29.7	91.5	180	15	18	50.9	7.56	2.48	2.99	1.29	5.97	4.8	71	6.4	406	NULL	9.9	0.74	NULL	NULL	NULL	5.01	2.09	5.91	99.16	16.86	20.62	17.21
68	female	154cm	58Kg	87cm	89cm	0.98	141mmHg	85mmHg	5.98	5.42	167	30.8	94.3	279	24	31	49.2	5.58	1.66	3.06	1.26	10.02	6.2	103	9	522	74.17	7.7	0.9	4.48	140.9	NULL	1.45	1.94	5.53	109	18.2	11.3	12
64	female	159.0cm	55.0Kg	95cm	97cm	0.98	107mmHg	54mmHg	7.11	4.41	137	31.1	94.1	310	45	30	50.9	4.37	1.3	3.12	0.66	8.88	5.1	103	3.8	467	83.58	NULL	0.74	NULL	NULL	NULL	2.36	1.33	4.8	87.38	19.5	11.87	10.17
64	female	157.0cm	71.0Kg	103cm	93cm	1.11	133mmHg	73mmHg	4.84	5.23	166	31.7	95.2	250	19	23	49.9	4.16	1.52	2.79	1.19	7.46	6.5	91	5.5	442	NULL	NULL	1.02	NULL	NULL	NULL	1.44	1.71	5.31	93.09	21.09	10.75	10.2
85	male	164cm	67Kg	87cm	94cm	0.93	164mmHg	74mmHg	4.82	4.05	126	31.1	91.6	206	16	19	46.1	3.49	1.15	2.93	0.78	9.93	5.8	60	7.3	236	100.25	NULL	0.78	NULL	NULL	NULL	3.49	1.74	4.93	84.46	16.47	<10.00	7.07
60	male	164.0cm	59.0Kg	84cm	99cm	0.85	130mmHg	79mmHg	3.51	4.4	141	32	95.9	136	15	21	47.8	4.6	1.5	2.95	1.84	8.31	5.4	82	8.6	373	NULL	10.9	0.86	NULL	NULL	106.2	1.88	2.1	6.18	108.2	19.95	<10.00	13.7
79	female	145cm	64Kg	98cm	101cm	0.97	166mmHg	78mmHg	5.24	4.5	146	32.4	101.3	223	20	23	49	5.03	2.01	3.8	0.9	6.3	5.1	57	3.1	224	NULL	NULL	0.68	NULL	NULL	101.4	2.78	1.82	5.61	123.7	20.52	<10.00	<9.00
80	female	150.0cm	65.0Kg	99cm	91cm	1.09	142mmHg	74mmHg	7.21	5.37	157	29.2	87.3	289	13	14	42.5	4.56	1.23	3.76	1.35	6.66	5.7	85	2.7	394	NULL	13	0.76	NULL	NULL	NULL	1.48	1.4	5.07	70.58	15.05	64	<9.00
66	female	161.0cm	63.0Kg	95cm	98cm	0.97	112mmHg	64mmHg	4.86	4.61	129	28	85.5	138	9	17	47	5.42	1.63	1.83	0.99	6.17	5.7	76	4	329	113.95	8.7	0.77	NULL	NULL	NULL	1.17	2.02	5.58	114	17.3	15	7.77
66	male	158.0cm	67.0Kg	86cm	97cm	0.89	141mmHg	81mmHg	7.45	5.44	179	32.9	96.9	214	150	100	50.6	5.08	1.21	3.52	0.88	4.81	5.2	46	4.3	110	133.19	NULL	0.57	NULL	NULL	NULL	2.55	1.51	4.45	96.6	13.1	12.36	16.12
71	female	153.0cm	62.0Kg	92cm	92cm	1.00	158mmHg	77mmHg	4.28	4.37	142	32.5	97.9	177	23	23	47.9	5.36	1.17	4.63	0.9	7.5	5.4	65	4.2	169	107.61	NULL	0.56	NULL	NULL	NULL	2.78	3.08	5.04	181.2	17.16	12.5	6.7
87	female	142cm	44Kg	87cm	92cm	0.95	150mmHg	54mmHg	5.29	5.14	165	32.1	94	242	28	30	49.4	5.74	1.11	2.88	0.51	5.04	5.6	59	6.1	269	118.48	21.4	0.73	NULL	NULL	103.8	1.66	1.69	4.46	87.23	14.5	11.07	15.49
64	male	158.0cm	67.0Kg	90cm	99cm	0.91	180mmHg	105mmHg	5.04	4.28	139	32.5	97.2	200	19	25	44.2	4.08	1.23	3.03	1.98	4.71	NULL	60	5.7	294	103.83	14.4	0.7	NULL	NULL	NULL	2.39	1.81	4.87	107.6	15.08	13.52	26.28
84	male	158.0cm	60.0Kg	86cm	92cm	0.93	138mmHg	67mmHg	6.95	4.95	145	29.3	89.7	225	18	13	45.8	4.77	1.56	3.09	1.9	5.37	5.8	95	2.6	321	81.79	17.5	0.96	NULL	NULL	NULL	1.65	2.19	5.56	104.6	20.62	12.44	<9.00
79	female	141.0cm	43.0Kg	75cm	87cm	0.86	179mmHg	82mmHg	3.43	4.99	157	31.5	92.4	194	24	27	46.6	6.54	1.34	2.19	1.36	4.87	NULL	78	4.7	237	71.91	14.3	1.07	4.11	139.3	NULL	3.18	2.03	5.13	111.5	15.64	12.1	<9.00
67	male	167cm	70Kg	87cm	98cm	0.89	128mmHg	71mmHg	4.1	4.44	136	30.6	97.1	187	16	27	38.8	4.06	1.45	2.93	1.28	5.07	5.6	95	4.6	339	87.13	14	0.87	NULL	NULL	104.9	2.72	2.03	4.55	134.8	18.71	11.3	8.67
81	male	160.0cm	61.0Kg	88cm	95cm	0.93	115mmHg	65mmHg	4.23	5.72	126	22	71.5	162	21	24	47.7	3.7	1.32	2.48	1.8	5.53	5	64	5.8	350	NULL	34.2	0.71	NULL	NULL	NULL	1.81	1.67	5.03	81.94	14.47	14.8	13.3
60	male	166.0cm	66.0Kg	92cm	95cm	0.97	117mmHg	74mmHg	7.82	5.06	156	30.8	91.7	311	32	21	51.2	6.6	1.35	3.88	3.15	4.78	5.9	65	5.2	212	90.92	9.6	0.81	NULL	NULL	NULL	1.18	1.84	5.17	105	14.1	12.6	16.66
64	female	155.0cm	52.0Kg	82cm	91cm	0.90	136mmHg	80mmHg	7.73	4.76	145	30.5	93.3	277	17	18	47.6	5.24	0.79	3.09	1.97	5.01	NULL	67	5	264	NULL	7.6	0.84	3.96	140.4	NULL	3.32	1.61	5.88	92.4	18.65	505	13.78
61	male	166cm	61Kg	81cm	90cm	0.90	128mmHg	85mmHg	7.02	4.85	155	32	94.4	217	22	13	48.6	5.33	1.36	2.69	1.14	5.52	5.9	70	5.6	488	102.42	NULL	0.81	NULL	NULL	103.4	4.28	1.84	4.74	103.1	15.79	<10.00	13.28
81	female	154cm	63Kg	91cm	97cm	0.94	165mmHg	83mmHg	5.5	4.32	139	32.2	99.5	188	19	16	39.6	4.01	1.14	2.96	0.78	5.41	5.4	59	4.1	243	NULL	NULL	0.73	NULL	NULL	NULL	1.69	1.87	5.33	100.4	16.84	10.03	<9.00
64	female	153.0cm	52.0Kg	80cm	87cm	0.92	139mmHg	66mmHg	4.22	5.44	93	17.1	60.5	308	9	15	48.2	5.45	2.09	4.3	2.04	5.61	5.6	91	4.4	381	88.61	15.2	0.84	NULL	NULL	NULL	3.45	2.3	7.06	113	20.1	<10.00	<9.00
62	male	161.0cm	76.0Kg	97cm	103cm	0.94	160mmHg	69mmHg	5.32	4.71	141	29.9	89.2	260	14	23	49.2	5.81	1.49	2.71	1.3	5.56	NULL	53	4	278	112.02	14.9	0.73	NULL	NULL	NULL	2.13	2.08	5.73	109.6	17.43	13.6	13.1
62	male	168cm	69Kg	91cm	93cm	0.98	123mmHg	83mmHg	6.09	4.76	145	30.5	94.3	243	14	14	49	5.76	1.54	2.88	1.11	9.39	5.2	87	3.2	497	106.92	NULL	0.85	NULL	NULL	NULL	4.75	2.17	5.96	88.95	14.98	19.02	324.5
81	male	163cm	48Kg	72cm	85cm	0.85	138mmHg	76mmHg	5.9	5.31	136	25.6	80.2	204	18	23	48.8	3.78	1.2	2.13	2.22	5.2	5.5	76	4.2	387	110.02	15.4	0.82	3.98	141.7	NULL	1.27	1.77	5.45	105.7	22.83	15.95	187.5
68	female	155.0cm	64.0Kg	88cm	101cm	0.87	155mmHg	85mmHg	8.57	6.09	181	29.7	91.5	215	33	24	50.5	6.38	1.18	1.94	1.89	6.59	NULL	77	5.6	404	NULL	12	0.66	NULL	NULL	NULL	2.09	1.43	5.28	84.53	17.13	245.5	<9.00
64	female	152cm	61.3Kg	93cm	94cm	0.99	156mmHg	77mmHg	5.97	4.11	127	30.9	95.1	168	12	21	46.3	4.4	1.76	2.27	0.93	5.64	5.6	70	3.5	339	92.36	NULL	0.72	NULL	NULL	102.3	1.85	1.21	3.73	70.34	14.24	<10.00	6.56
71	female	150cm	61Kg	85cm	93cm	0.91	111mmHg	60mmHg	6.57	5.69	163	28.6	83.8	193	17	25	51	4.65	1.79	2.39	0.77	6.28	NULL	69	4.8	405	NULL	NULL	0.72	NULL	NULL	NULL	2.18	2.02	4.98	104.7	15.05	<10.00	9.46
60	female	159cm	70Kg	89cm	97cm	0.92	132mmHg	75mmHg	8.03	5.59	168	30.1	92.3	152	25	23	52.1	4.32	1.03	2.27	0.72	6.84	NULL	84	4.1	474	NULL	NULL	0.88	NULL	NULL	NULL	3.4	1.82	4.85	91.17	21.43	<10.00	8.78
81	female	153.0cm	54.0Kg	81cm	90cm	0.90	136mmHg	69mmHg	5.98	4.48	144	32.1	100	194	8	14	51.2	4.11	1.63	2.23	1.87	6.64	5.9	85	6	429	NULL	9.2	0.76	NULL	NULL	NULL	2.83	1.68	5.42	80.07	17.84	12.8	<9.00
71	male	182.0cm	87.0Kg	98cm	103cm	0.95	142mmHg	72mmHg	6.81	4.77	153	32.1	97.3	305	18	21	45.8	7.47	1.32	3.14	3.06	5.54	5.9	72	5.2	529	118.16	13.7	0.99	NULL	NULL	NULL	2.15	2.16	6.2	104	16.3	14.5	17.47
62	male	163cm	63Kg	84cm	95cm	0.88	117mmHg	60mmHg	6.44	4.77	162	34	97.9	143	36	38	45.5	3.85	1.32	2.42	0.92	5.58	5.6	34	5.4	230	NULL	NULL	0.59	NULL	NULL	NULL	1.76	1.8	4.62	72.84	11.62	<10.00	11.29
74	female	155cm	52Kg	84cm	86cm	0.98	134mmHg	75mmHg	6.27	4.25	132	31.1	95.3	243	15	17	48.5	4.12	1.76	5.2	0.55	6.97	5.4	43	3.7	298	NULL	15.6	0.55	NULL	NULL	NULL	0.868	2.66	7.42	91.03	17.09	<10.00	33.38
88	female	142cm	45.2Kg	70cm	88cm	0.80	157mmHg	73mmHg	6.65	4.92	149	30.3	90.4	181	26	18	43.4	3.55	1.1	3.32	0.65	6.05	5.3	50	5	335	115.81	NULL	0.79	NULL	NULL	NULL	3.4	1.38	3.98	96.28	15.53	62.32	14.5
73	female	155.0cm	77.0Kg	100cm	104cm	0.96	123mmHg	78mmHg	8.05	4.83	154	31.9	97.1	306	11	20	49.7	4.52	1.53	3.42	0.67	5.31	5	52	3.6	157	NULL	NULL	0.69	NULL	NULL	NULL	3.83	1.55	4.93	69.98	14.54	<10.00	<9.00
67	female	146cm	49Kg	76cm	83cm	0.92	137mmHg	72mmHg	9.3	4.94	148	30	96	258	23	20	50	4.9	1.37	3.23	0.64	5.79	5.3	60	4.1	184	NULL	NULL	0.71	5.04	139	NULL	2.48	1.45	4.95	82.29	19.84	<10.00	10.55
63	female	156.0cm	58.0Kg	84cm	92cm	0.91	132mmHg	76mmHg	3.31	5.48	168	30.7	88.7	172	20	22	51	4.22	1.41	3.62	0.52	5.14	NULL	61	5.1	200	NULL	NULL	0.72	NULL	NULL	NULL	1.71	1.19	4.57	81.02	14.71	<10.00	<9.00
62	male	160.0cm	66.0Kg	90cm	99cm	0.91	132mmHg	83mmHg	5	6.11	189	30.9	90.5	266	17	21	42.5	2.95	0.96	3.98	1.92	5.71	5.8	85	3.2	361	88.45	29.6	0.83	NULL	NULL	NULL	2.31	1.93	5.59	114.5	19.26	14.02	10.28
65	male	158.0cm	76.0Kg	105cm	99cm	1.06	155mmHg	91mmHg	7.24	4.9	149	30.4	90.2	288	9	24	51.2	4.08	1.3	2.93	1.94	7.57	NULL	42	3.5	276	NULL	13.1	0.56	4.52	143.9	NULL	3.12	2.32	5.61	120.9	20.81	13.6	<9.00
63	female	151cm	47Kg	76cm	88cm	0.86	119mmHg	74mmHg	5.23	6.48	142	21.9	71	274	20	20	50.3	5.33	1.48	3.51	0.6	4.23	NULL	55	3.6	282	NULL	11.5	0.82	NULL	NULL	NULL	1.17	1.46	3.98	74.59	14.77	20.49	13.74
63	male	172.0cm	70.0Kg	92cm	96cm	0.96	129mmHg	83mmHg	5.34	4.8	149	31	90.4	228	22	18	44.5	3.82	1.39	2.51	0.59	5.46	NULL	74	5	344	116.02	NULL	0.68	NULL	NULL	NULL	2.26	1.75	6.22	99.46	21.89	14.39	<9.00
81	female	NULL	NULL	NULL	NULL	NULL	158mmHg	69mmHg	5.53	4.72	148	31.4	95.1	151	16	19	49.4	4.89	1.67	3.09	1.03	9.66	5.5	82	8.6	396	89.82	NULL	0.93	NULL	NULL	NULL	3.86	2.08	4.96	105	15.8	38.67	6.07
69	male	153.0cm	58.0Kg	87cm	90cm	0.97	121mmHg	78mmHg	5.08	3.94	132	33.5	99.2	161	27	33	42.4	5.14	1.58	4.89	1.44	6.01	5.7	94	5.8	349	59.86	12.8	1.05	4.24	142.1	NULL	4.15	1.36	4.42	75	14.3	13	11.68
63	female	152cm	48Kg	65cm	86cm	0.76	106mmHg	67mmHg	5.06	4.53	138	30.5	94.3	180	21	23	46.4	5.98	1.97	2.65	1.12	5.03	NULL	87	4.9	430	NULL	NULL	0.93	NULL	NULL	NULL	1.5	2.22	5.64	112.2	17.08	11.87	25.2
77	male	170cm	71Kg	87cm	101cm	0.86	134mmHg	77mmHg	5.57	5.74	163	28.4	88.5	324	36	20	49.2	4.59	1.01	2.96	4.23	4.74	4.9	57	3.8	269	123.25	16.8	0.88	3.81	140.8	NULL	5.33	2.27	5.85	103	14.2	13	8.45
62	male	167cm	57.7Kg	74cm	88cm	0.84	112mmHg	70mmHg	11.18	5.16	155	30	91.1	218	32	20	45.8	4.77	1.43	3.28	0.93	4.98	NULL	75	6.1	312	NULL	NULL	0.87	4.29	140	NULL	0.034	2.14	6.58	86.33	19.31	<10.00	16.14
71	female	153cm	53Kg	77cm	89cm	0.87	144mmHg	73mmHg	6.4	4.97	146	29.4	91.1	200	21	15	46.7	4.54	1.28	2.33	0.71	5.68	5.1	85	6.4	352	NULL	NULL	0.68	NULL	NULL	NULL	2.97	1.36	5.39	87.76	19.46	82.32	14.54
75	female	158.0cm	72.0Kg	93cm	111cm	0.84	102mmHg	64mmHg	5.91	4.65	147	31.6	97.8	96	61	44	47.6	6.72	1.78	2.94	1.56	5.98	5.5	91	7.5	440	83.77	20	1.04	NULL	NULL	NULL	2.5	2.2	6.21	100.8	18.49	13.92	<9.00
67	female	147.0cm	42.0Kg	75cm	82cm	0.91	136mmHg	77mmHg	5.08	4.14	132	31.9	101.9	230	14	15	47.9	4.8	1.56	4.41	0.69	5.67	5.4	52	6.3	248	117.58	NULL	0.67	NULL	NULL	NULL	2.89	1.61	4.35	91.4	13.75	11.97	26.77
61	male	161cm	63Kg	88cm	97cm	0.91	144mmHg	84mmHg	5.9	5.57	164	29.4	85.1	255	80	32	49.5	5.07	1.12	1.65	1.3	5.05	5.5	63	7.7	280	96.43	12.6	0.77	3.91	138.3	NULL	6.78	1.6	4.69	83.2	13.3	19.7	20.96
67	female	152.0cm	59.0Kg	94cm	95cm	0.99	150mmHg	82mmHg	3.66	4.62	135	29.2	94.8	188	10	18	49	4.43	2.06	1.61	0.7	7.05	NULL	69	2.6	336	NULL	NULL	0.94	NULL	NULL	NULL	4.23	2.11	5.93	119.3	17.79	20.35	11
83	male	163.0cm	68.0Kg	94cm	98cm	0.96	128mmHg	60mmHg	3.61	4.28	135	31.5	94.9	189	18	28	43.3	6.24	2.04	1.69	1.95	6.07	5.4	76	4.9	343	112.36	24	0.76	NULL	NULL	NULL	2.84	2.27	6.02	99.92	18.65	13.1	<9.00
64	female	164.0cm	72.0Kg	88cm	93cm	0.95	164mmHg	80mmHg	9.25	3.91	127	32.5	95.7	221	18	18	40.2	4.27	1.6	3.83	1.7	8.08	5.5	78	2.8	434	104.36	18.2	0.88	NULL	NULL	NULL	2.27	2	5.97	85.25	14.11	12.4	8.57
64	male	160.0cm	59.0Kg	88cm	91cm	0.97	129mmHg	74mmHg	4.36	4.81	147	30.6	95	176	29	24	52.7	3.47	1.35	1.95	2.86	7.84	6.1	68	3.8	406	108.11	12.1	0.88	NULL	NULL	NULL	0.778	1.85	5.98	91.41	17.95	13.2	27.78
62	female	155cm	49Kg	76cm	92cm	0.83	136mmHg	66mmHg	5.53	5.07	152	30	88.6	183	22	23	53.8	4.62	1.12	2.56	1.33	5.71	5.5	102	5.9	393	86.98	14.2	0.84	3.95	143	NULL	2.92	2.15	6.18	106.4	16.52	13.9	18.55
61	female	156.0cm	50.0Kg	76cm	88cm	0.86	127mmHg	66mmHg	4.39	4.86	148	30.5	93	230	17	23	43.6	4.39	2.14	4.5	1.73	4.95	5.3	79	5.7	320	NULL	NULL	0.86	NULL	NULL	NULL	2.51	1.89	6.01	97.88	16.32	634	27.89
64	male	162cm	73Kg	104cm	107cm	0.97	149mmHg	92mmHg	5.51	6.06	184	30.4	88.6	262	12	18	53.7	4.32	0.97	4.08	1.73	4.64	6.1	70	5.1	228	86.1	18.6	0.81	NULL	NULL	NULL	4.9	1.68	4.75	84.4	13.2	11.4	<9.00
67	female	157cm	72Kg	79cm	102cm	0.77	108mmHg	65mmHg	6.13	4.91	148	30.1	93.3	98	30	30	48.1	3.54	1.82	2.54	1.02	4.26	5.6	61	6.4	235	113.14	NULL	0.7	NULL	NULL	NULL	2.94	1.35	3.85	96.6	17.8	<10.00	9.98
60	female	153.0cm	47.0Kg	71cm	86cm	0.83	137mmHg	74mmHg	4.95	4.69	142	30.3	88.1	295	27	23	41.7	4.12	1.13	4.3	2.45	6.16	5.6	66	6.6	448	107.92	NULL	0.8	NULL	NULL	104.4	2.23	1.69	4.87	86.14	15.01	<10.00	<9.00
66	male	163cm	72Kg	96cm	103cm	0.93	131mmHg	81mmHg	5.66	5.47	171	31.3	92.7	213	53	31	46.7	5.24	1.13	2.11	2.91	5.99	5.1	85	3.6	444	107.68	12	0.84	NULL	NULL	NULL	2.24	1.56	5.41	102.5	18.76	3280	<9.00
62	male	160cm	62Kg	90cm	95cm	0.95	111mmHg	65mmHg	3.65	4.67	147	31.5	96.1	283	12	21	41.5	3.5	1.78	2.4	0.51	5.77	NULL	54	5.7	301	NULL	13.1	0.7	NULL	NULL	NULL	3.06	1.78	4.55	85.2	14.3	10.78	12.83
71	male	158cm	66Kg	88cm	98cm	0.90	109mmHg	60mmHg	10.75	5.2	165	31.7	99	203	27	28	52.9	4.79	1.58	2.26	0.52	5.02	5.3	95	5	394	76.24	12.3	0.84	NULL	NULL	NULL	1.69	1.39	4.18	92.9	18	<10.00	13.21
87	male	NULL	NULL	NULL	NULL	NULL	150mmHg	69mmHg	6.49	4.96	153	30.8	92.3	257	16	24	51.8	5.19	1.57	1.42	2.24	5.84	NULL	89	6.2	433	NULL	14.2	0.85	NULL	NULL	NULL	5.3	1.69	5.98	74.81	15.35	781.9	105.3
68	male	171cm	89.9Kg	104cm	111cm	0.94	129mmHg	77mmHg	3.63	4.8	133	27.7	86.5	170	25	21	51.6	3.35	1.8	1.85	0.7	5.76	5.3	48	4	266	NULL	NULL	0.66	NULL	NULL	NULL	2.89	1.64	4.89	96.71	16.06	<10.00	9.36
63	female	167.0cm	55.0Kg	73cm	91cm	0.80	116mmHg	67mmHg	22.73	5.48	170	31	92.9	285	48	28	48.5	6.08	0.86	3.18	2.48	5.37	5.4	72	4.5	433	116.51	10.6	0.73	NULL	NULL	NULL	3.4	1.69	4.76	80.69	15.2	<10.00	13.62
65	female	158cm	64.5Kg	83cm	88cm	0.94	130mmHg	79mmHg	5.52	4.58	137	29.9	92.8	232	10	24	46	5.99	1.34	1.35	0.8	7.38	NULL	44	3.4	244	NULL	NULL	0.66	NULL	NULL	NULL	2.35	1.53	4.73	100.1	16.85	10.59	5.05
67	female	151cm	60Kg	91cm	97cm	0.94	142mmHg	84mmHg	5.47	4.5	127	28.2	86.9	223	12	14	47.7	3.7	1.4	3.88	0.5	4.93	5.7	60	4.3	266	114.56	NULL	0.71	NULL	NULL	NULL	2.37	1.71	5.24	103.1	17.9	<10.00	9.14
74	male	168.0cm	72.0Kg	92cm	99cm	0.93	141mmHg	79mmHg	4.88	4.71	149	31.6	94.1	220	30	27	49.2	4.86	1.09	2.57	10.28	8.2	NULL	48	5	270	NULL	22.6	0.59	NULL	NULL	NULL	2.69	1.79	4.95	88.86	15.59	13.85	<9.00
66	female	147.0cm	49.0Kg	72cm	88cm	0.82	150mmHg	82mmHg	5.17	4.56	132	28.9	87.5	270	9	13	47.6	3.04	1.24	2.85	1.82	5.69	NULL	85	4.6	444	NULL	14.5	0.78	NULL	NULL	NULL	2.81	2	5.5	96.42	14.71	10.2	<9.00
64	female	154cm	53Kg	76cm	86cm	0.88	157mmHg	84mmHg	8.03	5.13	161	31.4	94.7	295	101	36	48.2	6	1.02	2.23	2.4	5.54	4.6	113	5.8	655	65.85	13	1.28	3.87	143.1	NULL	3.3	2.11	6.05	113	18.5	11.9	10.84
74	male	166cm	64Kg	87cm	96cm	0.91	139mmHg	56mmHg	4.81	4.52	140	31	92	170	9	17	47.3	4.63	1.68	1.62	2.05	7.04	NULL	176	2.8	624	36.95	12.4	1.74	NULL	NULL	NULL	1.46	1.29	4.38	72.53	16.73	10.7	<9.00
65	male	161cm	54Kg	72cm	89cm	0.81	150mmHg	81mmHg	9.64	4.36	135	31	94.5	242	12	20	47.5	5.35	1.61	3.18	1.82	5.44	5.7	68	4.4	303	NULL	18.9	0.81	4.82	138	100.5	3.29	1.48	5.01	88.33	16.58	14.1	<9.00
88	female	148cm	47Kg	82cm	94cm	0.87	185mmHg	72mmHg	7.54	4.45	130	29.2	89.7	198	21	26	45.9	4.69	1.32	4.08	0.54	5.27	5.3	63	5.8	255	NULL	18.6	0.78	NULL	NULL	NULL	1.42	1.46	5.31	99.95	18.96	>4000.00	23.88
72	male	152cm	62Kg	87cm	97cm	0.90	125mmHg	67mmHg	5.75	5.3	160	30.2	91.1	330	11	13	49.6	4	1.37	2.97	1	5.2	5.6	84	4	308	84.23	20.3	0.91	NULL	NULL	NULL	10.9	1.75	4.7	105	16.2	<10.00	15.34
62	female	158cm	64.9Kg	87cm	91cm	0.96	125mmHg	61mmHg	5.34	5.37	164	30.5	91.8	180	28	18	51.9	4.3	1.21	4.19	1.14	4.86	6	43	4.3	311	NULL	15.1	0.67	NULL	NULL	NULL	4.91	1.71	4.43	85.51	13.69	12.6	12.38
64	female	156cm	56Kg	91cm	93cm	0.98	118mmHg	71mmHg	5.36	4.35	141	32.4	100.9	164	24	23	47.4	2.84	1.3	2.46	0.8	6.02	5.6	66	3.1	303	119.91	NULL	0.8	NULL	NULL	NULL	2.5	2.23	5.35	117	17.9	<10.00	13.05
66	male	163cm	69Kg	85cm	98cm	0.87	140mmHg	66mmHg	5.42	4.97	142	28.6	86.7	166	27	32	47.5	4.39	1.57	2.51	0.94	5.38	5.3	54	5.8	255	121.98	NULL	0.71	NULL	NULL	NULL	2.85	1.68	4.84	76.55	13.39	<10.00	18.95
88	male	171.0cm	83.0Kg	100cm	109cm	0.92	130mmHg	82mmHg	3.71	4.89	152	31.1	95.5	203	32	23	51.3	5.69	1.36	2.21	1.32	4.74	5.5	97	5.7	299	86.77	21.5	0.92	NULL	NULL	NULL	2.36	2.11	6.51	109	18	11.7	8.07
63	male	165cm	63Kg	80cm	91cm	0.88	117mmHg	59mmHg	5.84	5.08	158	31.1	92.3	170	22	23	46.5	4.62	1.18	2.55	2.31	4.7	5.8	77	3.6	466	114.14	15.3	0.87	NULL	NULL	NULL	1.9	1.96	5.61	99.39	16.11	<10.00	21.45
68	female	152cm	64Kg	84cm	98cm	0.86	140mmHg	60mmHg	4.68	5.52	156	28.3	88.4	195	31	18	46.6	3.15	0.95	2.02	1.06	4.77	5.6	48	4.5	412	121.57	NULL	0.62	NULL	NULL	NULL	1.38	1.99	5.35	107	16.7	13.07	9.46
70	male	172cm	66.5Kg	76cm	91cm	0.84	120mmHg	70mmHg	6.74	4.26	133	31.2	94.6	352	51	40	48.1	5.8	1.12	4.22	0.92	5.11	NULL	56	5.9	337	NULL	14.8	0.71	NULL	NULL	NULL	4.24	1.79	5.2	114.2	18.63	14.24	6.4
62	male	164cm	65Kg	85cm	100cm	0.85	118mmHg	74mmHg	8.42	4.57	144	31.5	97.6	188	20	18	51.1	6.13	1.6	2.7	1.74	5.13	5.7	109	9.6	442	72.25	13.8	0.89	NULL	NULL	NULL	3.37	1.73	5.06	79.9	14.2	13.6	<9.00
60	male	173cm	63Kg	76cm	89cm	0.85	135mmHg	85mmHg	5.31	5.79	150	25.9	80.8	281	12	18	50.5	3.93	1.41	3.72	0.96	4.42	5.8	62	5.4	348	105.47	NULL	0.54	NULL	NULL	NULL	2.16	1.25	4.12	83.86	17.2	<10.00	10.96
62	female	156cm	48Kg	66cm	85cm	0.78	124mmHg	78mmHg	4.89	5.54	163	29.4	89.4	161	80	43	50.5	4.38	1.07	2.94	1.02	5.06	5.5	55	5.1	329	110.67	NULL	0.73	NULL	NULL	104.1	2.74	1.59	4.88	83.7	15.2	<10.00	>600.00
65	female	155.0cm	63.0Kg	87cm	93cm	0.94	92mmHg	59mmHg	6.18	4.3	120	27.9	85.8	287	9	13	44.3	4.77	1.86	3.83	0.6	5.47	5.7	66	3	325	91.8	NULL	0.82	NULL	NULL	NULL	1.88	1.67	5.04	105.5	19.13	13.1	22.11
67	female	151cm	62.1Kg	86cm	102cm	0.84	110mmHg	69mmHg	4.39	4.7	149	31.7	95.1	266	27	29	50.9	7.08	1.99	3.26	0.79	4.66	5.3	92	4.6	364	NULL	NULL	0.75	NULL	NULL	NULL	3.73	1.57	5.35	96.6	18.22	<10.00	>600.00
60	female	157cm	61.5Kg	81cm	90cm	0.90	117mmHg	73mmHg	9.52	5.32	161	30.3	89.7	215	20	14	52.1	4.02	1.14	4.03	0.79	5.95	5.3	66	4.2	178	NULL	NULL	0.69	NULL	NULL	NULL	0.84	1.56	4.66	110.9	17.82	70.98	9.95
66	male	NULL	NULL	NULL	NULL	NULL	NULL	NULL	4.94	5.37	160	29.8	89.2	166	35	27	48.9	4.69	1.27	2.23	0.68	6.78	5.5	83	6.7	337	96.97	NULL	0.94	NULL	NULL	NULL	3.75	1.96	5.74	84.7	18.1	<10.00	6.98
60	male	160.0cm	61.0Kg	84cm	92cm	0.91	108mmHg	67mmHg	7.51	5.67	177	31.2	91	239	57	34	53.5	5.52	1.17	2.16	0.76	4.26	NULL	60	5.1	284	NULL	NULL	0.77	NULL	NULL	NULL	2.45	2	5.41	106.5	17.46	<10.00	10.26
73	male	166cm	61.6Kg	77cm	88cm	0.87	123mmHg	60mmHg	3.85	5.82	119	20.4	68.6	232	29	23	50	4.31	1.18	2.92	0.65	4.59	5.5	54	3.7	257	NULL	NULL	0.65	NULL	NULL	NULL	2.15	1.41	3.8	85.94	17.17	37.68	15.67
61	male	154cm	52Kg	79cm	88cm	0.90	130mmHg	75mmHg	6.64	4.72	144	30.5	93.6	263	15	21	44.6	5.16	1.65	2.49	1.07	5.36	NULL	49	4.2	282	NULL	NULL	0.69	NULL	NULL	NULL	0.781	1.95	4.83	94.65	14.51	<10.00	18.91
65	female	152cm	45Kg	70cm	85cm	0.82	114mmHg	52mmHg	4.46	4.24	127	30	94.6	141	41	49	49.9	3.63	1.28	4.06	0.54	4.82	5.6	65	3.8	270	106.11	NULL	0.72	NULL	NULL	NULL	6.6	1.54	5.09	80.73	15.63	490.1	14.43
63	male	164cm	56Kg	77cm	88cm	0.87	121mmHg	87mmHg	6.67	4.65	139	29.9	91.8	292	13	14	46.6	4.85	1.33	3.84	0.87	5.17	NULL	43	4.1	277	NULL	NULL	0.68	4.1	142.8	NULL	4.69	1.49	5.35	80.09	16.81	<10.00	16.8
70	male	167.0cm	57.0Kg	82cm	92cm	0.89	115mmHg	57mmHg	6.47	4.84	170	35.1	101	222	62	34	38.4	5.52	1.12	3.04	1.74	4.46	5.7	74	4.5	264	86.97	15.1	0.61	NULL	NULL	104	1.81	1.16	3.85	57.77	13.12	16.08	<9.00
67	male	162.0cm	74.0Kg	95cm	100cm	0.95	158mmHg	78mmHg	5.63	5.02	148	29.5	93.2	190	35	21	45.6	5.6	1.17	4.5	1.75	5.31	NULL	94	6.4	431	92.05	16.8	0.81	4.38	140.6	NULL	0.655	1.54	5.1	113	19.1	10.1	<9.00
63	female	151cm	47Kg	72cm	92cm	0.78	127mmHg	84mmHg	5.29	4.49	137	30.5	91.5	189	20	20	50.9	5.63	1.25	3.33	1.46	5.31	6.9	57	8.9	247	83.75	13.6	0.8	NULL	NULL	101.3	2.99	1.92	4.86	113	16.2	22.4	9.55
71	female	153cm	51Kg	84cm	95cm	0.88	116mmHg	71mmHg	6.37	4.81	162	33.7	109.8	181	22	29	52	6	1.31	5.29	1.27	4.79	5.8	95	5.7	469	90.24	14	0.79	4.07	138.4	NULL	2.27	1.78	5.83	106	17.9	12.6	22.33
75	male	166.0cm	70.0Kg	92cm	97cm	0.95	141mmHg	75mmHg	6.22	5.11	150	29.4	86.3	345	24	21	50	4.66	0.75	2.45	2.1	4.99	NULL	77	4.3	347	NULL	12.9	0.76	NULL	NULL	NULL	3.1	1.65	5.8	86.86	16.69	17.49	9.9
68	male	156cm	53Kg	82cm	87cm	0.94	149mmHg	70mmHg	5.64	4.75	145	30.5	93.9	232	10	13	51.8	5.75	1.77	2.81	0.84	8.4	4.7	55	4.7	251	119.56	NULL	0.68	NULL	NULL	NULL	3.15	2.4	6.34	102.6	19.14	20.22	16.55
67	male	168.0cm	67.0Kg	89cm	96cm	0.93	133mmHg	71mmHg	5.61	4.86	141	29	88.1	275	6	13	45.3	4.26	1.24	2.33	1.33	7.96	5.6	91	3.4	518	84.36	NULL	1.01	NULL	NULL	NULL	1.32	2.45	5.48	104.2	16.04	35.5	9.22
60	male	164.0cm	60.0Kg	83cm	95cm	0.87	112mmHg	67mmHg	4.18	3.85	120	31.2	96.9	202	11	19	45.8	4.23	1.74	3.22	0.43	4.37	5.2	44	2.7	261	NULL	NULL	0.54	NULL	NULL	NULL	4.62	1.76	4.94	107.5	15.57	<10.00	10.48
66	male	162.0cm	78.0Kg	100cm	102cm	0.98	117mmHg	73mmHg	6.31	4.59	129	28.1	91.3	335	8	16	46.6	4.06	1.13	2.04	0.56	5.9	NULL	55	2.8	166	NULL	NULL	0.72	NULL	NULL	NULL	3.15	1.51	4.31	92.86	16.17	13.25	26.56
75	male	166cm	74Kg	85cm	93cm	0.91	153mmHg	93mmHg	5.34	4.51	142	31.5	93.8	278	16	20	47.3	5.32	1.27	3.09	1.09	6.44	NULL	75	4.8	327	NULL	NULL	0.88	NULL	NULL	101.9	3.81	1.73	4.98	106.7	16.76	12.94	15.74
61	male	169cm	63Kg	83cm	93cm	0.89	123mmHg	69mmHg	5.5	4.87	145	29.8	93.4	194	12	18	49.5	5.06	1.68	1.59	1.18	13.17	NULL	52	6.7	290	NULL	NULL	0.79	NULL	NULL	NULL	2.78	1.86	5.18	124.8	17.27	15.4	10.11
87	male	150cm	51Kg	80cm	85cm	0.94	120mmHg	60mmHg	6.36	5.06	166	32.8	95.5	198	32	34	47.3	5.27	1.75	5.56	1.13	5.65	NULL	62	3.8	248	NULL	NULL	0.65	NULL	NULL	NULL	1.64	1.95	4.87	99.2	14.4	<10.00	9.31
76	male	160.0cm	63.2Kg	81cm	90cm	0.90	173mmHg	86mmHg	6.51	5.16	146	28.3	87.4	234	27	20	53.8	3.56	1.57	3.34	0.73	4.72	5.5	46	5.9	228	128.59	13.1	0.7	NULL	NULL	NULL	0.887	1.71	4.89	92.68	15.55	<10.00	183.3
77	male	168cm	63.8Kg	79cm	92cm	0.86	102mmHg	61mmHg	6.04	4.5	135	30	92.4	155	16	19	47.6	4.46	1.91	2.4	0.84	5.35	5.2	58	4.9	269	NULL	NULL	0.71	NULL	NULL	NULL	4.39	1.37	3.43	77.02	11.12	<10.00	13.91
73	male	154.0cm	51.0Kg	76cm	93cm	0.82	138mmHg	73mmHg	6.54	5.41	167	30.9	92.8	255	40	25	49.7	6.95	1.46	2.53	1.86	4.58	5.3	94	5.5	383	77.22	NULL	0.96	NULL	NULL	99.2	3.56	2.06	6.22	115.8	18.69	14.1	<9.00
72	male	172.0cm	70.0Kg	92cm	102cm	0.90	127mmHg	82mmHg	4.71	6.15	135	22	71.7	150	19	26	49.4	4.13	1.33	2.86	1.67	4.95	5.3	81	4.7	425	92.45	NULL	0.99	NULL	NULL	99.9	2.17	1.85	4.92	99.98	18.16	10.2	<9.00
65	male	170.0cm	72.0Kg	94cm	101cm	0.93	149mmHg	76mmHg	8.73	5.42	155	28.6	89.7	325	34	26	50.4	4.88	1.74	3.88	1.31	18.23	5.5	66	5.2	335	NULL	15.9	0.84	NULL	NULL	NULL	1.91	1.73	5.35	92.17	17.01	11.4	<5.00
79	male	164cm	63.0Kg	92cm	96cm	0.96	111mmHg	59mmHg	6.3	4.73	135	28.5	89.2	179	26	16	45.1	3.77	1.27	1.96	0.97	13.87	6	62	3.3	371	NULL	18.4	0.76	NULL	NULL	NULL	4.91	1.88	4.8	134.2	17.9	10.18	28.03
78	male	160cm	56Kg	78cm	85cm	0.92	151mmHg	95mmHg	7.96	5.53	159	28.8	90.4	350	30	23	50.8	5.38	0.98	2.88	1.02	4.62	5.4	64	5	185	108.12	NULL	0.84	NULL	NULL	NULL	4.51	1.84	4.42	98.53	13.68	<10.00	10.67
61	female	161cm	53Kg	70cm	90cm	0.78	125mmHg	68mmHg	4.57	4.53	147	32.5	92.3	249	7	17	50.7	3.85	1.7	4.28	0.49	4.72	5.2	49	6.3	210	109.44	NULL	0.68	NULL	NULL	NULL	1.44	1.54	3.69	93.2	13	26.89	32.71
65	male	163cm	63Kg	90cm	93cm	0.97	120mmHg	78mmHg	5.79	4.08	130	31.9	100	132	13	30	49.2	5.26	1.74	3.33	0.42	5.17	NULL	48	5.2	240	NULL	15.5	0.64	NULL	NULL	NULL	7.47	1.74	4.8	109.9	17.3	12.28	11.8
80	female	148cm	57.4Kg	84cm	96cm	0.88	138mmHg	69mmHg	5.59	5.44	167	30.7	91.9	176	13	18	51.1	3.85	1.49	0.86	0.92	5.29	5.5	64	6.3	367	112.4	NULL	0.81	NULL	NULL	NULL	0.994	1.87	5.42	90.86	16.26	<10.00	10.27
73	male	165cm	69Kg	90cm	104cm	0.87	121mmHg	91mmHg	4.98	5.42	150	27.7	88.6	276	47	30	44.5	5.64	1.3	2.66	0.96	6.36	5.4	72	3.1	398	117.33	20.1	0.68	NULL	NULL	NULL	1.26	1.55	5.13	90.25	19.44	13.3	<9.00
64	female	154.0cm	50.0Kg	75cm	89cm	0.84	97mmHg	52mmHg	8.63	5.5	169	30.7	94	205	17	15	48.7	3.71	1.16	3.22	0.49	4.75	5.3	64	3.8	238	105.86	NULL	0.79	NULL	NULL	NULL	4.56	1.58	4.58	82.4	15.5	12.04	<5.00
64	female	149cm	50Kg	71cm	91cm	0.78	119mmHg	60mmHg	6.98	5.95	132	22.2	71.1	170	16	20	46.5	4.41	1.7	3.4	1.03	5.04	5.2	93	3.2	348	NULL	NULL	0.91	NULL	NULL	NULL	4.52	1.59	4.38	72.19	14.46	144.8	11.04
81	male	171cm	43Kg	67cm	82cm	0.82	102mmHg	72mmHg	6.53	4.62	138	29.9	94.8	180	23	25	44.5	5.05	1.59	2.97	1.05	4.66	5.5	75	5.7	253	NULL	NULL	1.48	NULL	NULL	NULL	2.61	1.92	4.72	114.1	18.63	<10.00	18
64	female	148.0cm	41.0Kg	66cm	85cm	0.78	132mmHg	77mmHg	6.43	4.27	135	31.6	95.3	142	11	16	46.9	5.68	1.65	2.21	1.9	4.98	8.8	92	5.5	344	86.23	15.1	0.82	NULL	NULL	NULL	4.88	2.21	6.09	93.39	16.08	13.31	28.5
78	male	161cm	50Kg	73cm	87cm	0.84	141mmHg	67mmHg	6.23	5.84	179	30.7	85.1	231	88	44	51.6	4.44	0.93	3.45	2.18	6	5.6	92	4.3	235	74.93	13.5	0.86	NULL	NULL	NULL	7.17	1.31	4.56	68.3	14.5	11.9	10.38
68	male	161.0cm	65.0Kg	92cm	101cm	0.91	110mmHg	68mmHg	7.24	7.25	142	19.6	61.2	194	31	24	48.6	4.76	0.96	4.14	1.72	5.87	5.3	43	6.4	262	NULL	11.7	0.84	NULL	NULL	NULL	1.46	1.66	5.32	71.25	11.86	16.84	16.89
83	female	162cm	51Kg	75cm	91cm	0.82	138mmHg	71mmHg	9.54	5.15	166	32.2	96.3	249	37	26	53.3	7.34	1.42	3.95	0.99	5.28	5.3	88	4.3	398	100.39	NULL	0.7	NULL	NULL	NULL	2.82	1.82	4.99	114	17.7	<10.00	11.67
64	male	158cm	46Kg	62cm	84cm	0.74	139mmHg	76mmHg	5.63	2.85	89	31.2	96.1	202	15	20	39.7	5.91	0.93	2.54	0.56	4.21	5.1	42	7.5	219	NULL	NULL	0.64	4.47	142.5	NULL	2.62	2.33	5.5	100.5	14.61	10.7	95.73
66	female	154.0cm	45.0Kg	75cm	85cm	0.88	116mmHg	78mmHg	6.23	5.21	167	32.1	96.5	191	46	31	48	3.65	1.02	2.14	2.49	5.36	5.9	102	5.3	379	NULL	13.7	1	4.25	143.6	NULL	1.75	1.85	5.14	135.8	23.3	10.63	12.33
61	female	153.0cm	50.0Kg	71cm	87cm	0.82	145mmHg	89mmHg	5.78	5.59	123	22	72.3	300	10	15	50.6	5.09	2.54	3.81	0.88	5.67	NULL	71	3.9	240	NULL	NULL	0.79	4.12	140.3	NULL	0.794	2.46	5.7	99.2	12.63	<10.00	9.42
66	female	151.0cm	43.0Kg	70cm	82cm	0.85	101mmHg	60mmHg	3.92	5.1	151	29.6	86.9	159	59	41	49.7	3.71	1.45	2.8	0.98	5.66	5	61	6.5	260	NULL	NULL	0.58	NULL	NULL	NULL	2.18	1.36	3.95	78.57	12.69	21.48	19.97
69	female	169cm	58Kg	80cm	92cm	0.87	107mmHg	67mmHg	8.05	6.02	131	21.8	67.1	134	30	20	48.5	3.84	1.03	5.16	1.01	5.22	5.7	50	4.6	317	123.37	11.1	0.75	NULL	NULL	NULL	4.32	1.79	5.14	109.6	17.11	34.09	12.94
65	female	154.0cm	46.0Kg	73cm	90cm	0.81	116mmHg	73mmHg	6.82	4.91	169	34.4	100.2	122	37	22	49.1	3.45	0.87	4.53	1.8	4.15	11.1	73	7.4	266	107.24	10.9	0.78	NULL	NULL	NULL	2.01	1.73	5	128.5	21.13	13.21	<9.00
65	female	148cm	57Kg	86cm	96cm	0.90	122mmHg	72mmHg	8.42	4.54	129	28.4	88.8	235	12	17	50.4	6.37	2.18	4.2	1.74	7.3	10.4	81	4.8	310	95.08	NULL	0.9	NULL	NULL	NULL	1.51	2.34	5.62	106.8	17.62	10.7	<9.00
67	female	152cm	46Kg	74cm	86cm	0.86	169mmHg	94mmHg	5.49	4.62	126	27.3	83.3	249	12	16	48.5	3.82	1.72	2.58	1.52	5.11	5.2	95	3	420	90.24	21.9	0.75	4.04	141.2	NULL	6.56	1.42	4.82	95.25	18.4	16.1	28.35
68	female	145cm	48Kg	71cm	84cm	0.85	143mmHg	60mmHg	5.43	5.29	168	31.8	90.7	85	38	28	49.3	5.29	1.05	2.71	1.05	4.43	5.4	59	4.9	218	NULL	NULL	0.67	NULL	NULL	NULL	1.52	1.66	4.32	105.5	15.97	<10.00	81.9
64	female	147cm	58Kg	95cm	98cm	0.97	148mmHg	85mmHg	5.23	4.82	156	32.4	94.2	214	20	19	48.4	2.98	1.27	2.18	3.58	5.27	5.6	86	5.5	335	94.88	10.8	0.84	NULL	NULL	NULL	2.1	2.29	6.46	108.4	17.24	52.7	11.23
65	female	150cm	65Kg	86cm	97cm	0.89	107mmHg	66mmHg	5.82	4.45	138	31	93.3	274	18	20	48.9	3.97	1.68	2.96	1.05	4.94	5.2	78	3.2	360	115.14	NULL	0.75	NULL	NULL	NULL	1.74	2.06	5.57	95.1	14.6	379.3	27.24
63	female	157cm	62.4Kg	85cm	90cm	0.94	92mmHg	64mmHg	8.27	5.5	161	29.3	87.1	274	26	18	49.7	4.52	1.07	3.19	0.92	4.9	5.9	51	3.5	291	NULL	9.7	0.66	NULL	NULL	NULL	1.6	1.61	4.66	101.2	15.31	17.72	11.68
61	female	150cm	52.6Kg	76cm	90cm	0.84	136mmHg	80mmHg	4.89	4.8	150	31.3	94.2	216	21	21	49.3	4.15	1.53	4.41	1.04	5.3	NULL	64	5.5	327	NULL	NULL	0.83	NULL	NULL	NULL	4.15	1.59	4.87	91.79	17.76	16.62	10.61
60	female	156cm	71Kg	97cm	97cm	1.00	119mmHg	78mmHg	5.32	4.5	138	30.7	94.7	252	11	16	51.6	3.69	1.63	2.73	0.61	4.96	5.4	56	4.1	235	108.48	NULL	0.68	NULL	NULL	NULL	1.31	1.48	5.17	81.12	19.36	<10.00	37.88
62	male	166cm	68Kg	84cm	95cm	0.88	158mmHg	84mmHg	4.96	5.87	177	30.2	89.9	169	26	19	48.5	4.55	1.2	3.86	1.27	6.54	5.4	94	3.9	372	88.25	17.8	1.07	NULL	NULL	NULL	4.64	2.28	5.57	102	16.2	12.1	20.1
81	male	168.0cm	79.0Kg	101cm	103cm	0.98	145mmHg	81mmHg	5.89	4.95	148	29.9	89.1	205	10	15	51.3	4.41	1.82	2.46	1.97	7.35	NULL	47	2.9	213	NULL	18.7	0.61	NULL	NULL	NULL	4.26	1.51	4.47	90.67	15.84	11.6	12
95	male	166cm	65.2Kg	86cm	99cm	0.87	165mmHg	79mmHg	6.49	5.77	163	28.2	87.2	123	61	30	46.4	5.01	0.95	3.07	0.53	5.11	5.4	64	5.5	302	113.57	NULL	0.63	NULL	NULL	NULL	2.07	1.43	4.39	95.43	16.29	<10.00	11.93
79	male	168.0cm	73.0Kg	91cm	100cm	0.91	156mmHg	86mmHg	4.18	5.54	166	30	89.9	297	19	20	47.4	5.23	1.16	3.31	1.41	6.6	10.7	53	5.5	256	111.64	18.9	0.7	NULL	NULL	NULL	7.99	1.57	4.74	89	16.4	10.4	10.57
87	male	NULL	NULL	NULL	NULL	NULL	127mmHg	60mmHg	7.13	4.37	132	30.2	93.6	293	11	18	50.1	4.03	1.16	1.49	0.61	4.65	5.1	67	3.5	311	109.74	NULL	0.66	NULL	NULL	NULL	3.83	2.26	5.6	127.7	20.07	<10.00	10.99
78	male	160cm	69Kg	94cm	94cm	1.00	130mmHg	67mmHg	6.55	4.42	120	27.1	87.3	368	14	20	44.9	4.33	2.08	2.68	0.66	6.76	4.9	57	5.1	315	117.33	NULL	0.66	NULL	NULL	NULL	2.13	1.58	4.79	99.06	21.5	<10.00	10.59
70	male	165.0cm	65.0Kg	83cm	98cm	0.85	105mmHg	63mmHg	6.64	5.25	160	30.5	92.4	199	20	21	50.4	3.93	1.2	2.14	0.93	4.98	NULL	57	3.3	215	107.09	NULL	0.69	NULL	NULL	97.4	2.84	1.46	4.9	88.85	17	10.14	10.59
64	female	151cm	60.4Kg	92cm	97cm	0.95	110mmHg	64mmHg	7.44	5.44	165	30.3	92.1	244	14	21	45.8	5.91	0.91	3.95	0.85	9.47	4.9	45	6.5	225	NULL	NULL	0.66	NULL	NULL	NULL	2.24	1.7	5.1	88.6	15.24	286.2	22.14
79	female	139cm	33Kg	63cm	78cm	0.81	124mmHg	79mmHg	4.33	4.64	151	32.5	97.8	114	17	19	50	4.77	1.17	3.16	1.12	5.07	5.9	74	6.5	387	92.01	NULL	0.94	NULL	NULL	NULL	0.848	2.08	4.97	131.3	20.72	13.76	15.32
63	female	158.0cm	52.0Kg	75cm	92cm	0.82	96mmHg	63mmHg	9.32	4.6	155	33.7	98.9	198	33	29	49.3	5.2	1.11	3.32	0.49	4.28	5.6	68	5.3	221	NULL	NULL	0.8	NULL	NULL	NULL	2.65	1.78	5.3	100.1	22.59	<10.00	16.61
64	male	164cm	62Kg	84cm	90cm	0.93	146mmHg	95mmHg	6.45	4.51	132	29.3	89.1	213	8	15	54.1	4.45	1.63	3.08	1.02	4.95	5.7	86	2.8	422	83.02	15.1	0.87	NULL	NULL	NULL	0.693	1.66	5.07	78.2	16.3	<10.00	74.36
62	male	171.0cm	61.0Kg	81cm	91cm	0.89	156mmHg	85mmHg	5.7	4.62	147	31.8	96.5	329	11	13	49.8	6.38	1.18	3.82	0.59	4.79	5	84	7.7	395	90.99	NULL	0.76	NULL	NULL	NULL	2.92	1.98	6.04	121.4	21.72	13.66	21.25
60	male	170cm	55Kg	72cm	92cm	0.78	112mmHg	70mmHg	8.44	4.62	98	21.2	72.9	319	9	17	49.1	4.28	1.26	3.05	0.77	4.73	5.1	76	3.6	388	118.86	NULL	0.83	NULL	NULL	NULL	1.99	1.59	4.85	110	17.9	<10.00	20.41
78	male	NULL	NULL	NULL	NULL	NULL	142mmHg	56mmHg	4.73	4.89	153	31.3	93.5	275	21	19	50.1	3.6	1.4	2.94	0.76	10.01	5.5	96	4.9	371	NULL	NULL	0.8	NULL	NULL	NULL	2.15	1.81	5.32	94.06	15.17	129.9	<5.00
65	male	159.0cm	52.0Kg	76cm	90cm	0.84	153mmHg	89mmHg	5.21	5.6	165	29.5	89.6	153	41	30	47.6	3.69	0.85	1.89	1.58	4.64	5.4	75	4.7	288	NULL	12.7	0.9	NULL	NULL	NULL	2.1	1.58	4.52	120.9	18.9	11.1	18.18
70	male	NULL	NULL	NULL	NULL	NULL	NULL	NULL	5.91	4.53	141	31.1	98.7	120	27	30	47.7	5.31	1.72	2.43	1.02	4.71	5.4	72	10.6	369	118.16	NULL	0.83	NULL	NULL	NULL	1.67	2.04	5.72	103	17.7	<10.00	17.5
61	male	164cm	59.7Kg	70cm	90cm	0.78	110mmHg	50mmHg	5.85	5.52	159	28.8	90.8	157	18	28	51.6	4.97	1.3	2.58	1.09	5.61	4.7	71	4.4	287	99	NULL	0.94	NULL	NULL	NULL	3.32	1.96	5.33	93.3	15.7	<10.00	<5.00
83	male	156cm	50Kg	73cm	89cm	0.82	118mmHg	52mmHg	6.57	4.17	128	30.7	94	255	14	22	44.3	5.14	1.74	2.46	1.62	7.39	6.4	101	4.1	487	NULL	18.2	1.13	NULL	NULL	NULL	2.17	1.44	5.04	101.3	19.78	12.7	8.51
66	female	150.0cm	57.0Kg	79cm	89cm	0.89	136mmHg	67mmHg	3.98	4.36	133	30.5	90.8	240	14	17	45.6	5.18	1.7	2.61	0.67	5.27	NULL	91	5.3	289	NULL	9.6	0.85	NULL	NULL	NULL	1.24	2.09	5.53	125	18.55	2849	11.3
63	male	153cm	60Kg	84cm	98cm	0.86	139mmHg	87mmHg	5.5	5.41	164	30.3	93.7	188	33	20	47.8	5.46	1.16	3.03	1.98	6.17	NULL	89	4.3	370	NULL	14.2	0.76	NULL	NULL	NULL	1.71	1.8	5.58	89.47	15.39	15.7	9.93
72	male	150cm	50Kg	79cm	85cm	0.93	133mmHg	78mmHg	6.14	4.59	146	31.8	94.1	114	16	19	46.5	3.74	1.09	2.88	1.41	4.94	5.4	73	3.5	628	118.32	25.5	0.72	NULL	NULL	NULL	1.63	2.22	6.24	96.07	15.72	40.2	16.03
60	female	154.0cm	46.0Kg	67cm	85cm	0.79	110mmHg	64mmHg	5.49	5.03	150	29.8	92.8	192	31	37	48.8	5.6	1.9	2.6	1.37	5.03	4.9	40	4.9	309	NULL	11.2	0.77	NULL	NULL	NULL	2.98	2.6	5.67	113.9	14.21	13.8	<9.00
77	male	157cm	58Kg	87cm	97cm	0.90	142mmHg	77mmHg	6.02	5.34	166	31.1	95.1	154	13	13	48.5	5.86	1.14	4.49	2.69	7.46	5.9	73	7.1	418	NULL	12	0.81	NULL	NULL	NULL	3.72	1.85	5.24	102.8	15.72	13.25	<9.00
64	female	155.0cm	62.0Kg	93cm	99cm	0.94	137mmHg	71mmHg	5.35	4.62	138	29.9	91.1	217	10	13	48.7	3.63	1.6	4.12	0.73	5.92	5.8	54	3.1	297	NULL	NULL	0.78	3.7	141.2	NULL	2.43	1.57	4.51	124.2	21.98	<10.00	12.27
68	male	161cm	64.5Kg	83cm	91cm	0.91	131mmHg	77mmHg	7.24	5.47	169	30.9	94.7	184	20	19	50.2	5.05	0.9	1.82	0.83	5.19	5.8	76	6.7	269	80.17	11.9	0.76	NULL	NULL	NULL	2.18	2	5.22	109	16.9	<10.00	7.52
77	male	160.0cm	52.0Kg	76cm	91cm	0.84	137mmHg	81mmHg	8.67	5.64	162	28.7	89.7	202	32	20	51.8	4.19	1.21	1.87	1.75	5.77	5.5	49	4.3	287	NULL	16.4	0.67	NULL	NULL	NULL	2.63	2.15	5	93.2	15.34	10.1	<9.00
63	male	165cm	67Kg	91cm	95cm	0.96	136mmHg	70mmHg	7.14	5.26	173	32.9	99.8	227	62	35	49.8	5.78	1.09	2.47	0.85	5.14	5.2	70	4.6	269	NULL	NULL	0.7	NULL	NULL	NULL	2.69	1.19	4.2	83.65	16.3	<10.00	10.94
61	male	163cm	63Kg	85cm	87cm	0.98	125mmHg	82mmHg	8.17	6.59	174	26.4	81.3	221	55	33	49.6	6.76	0.83	2.26	0.97	5.46	5.3	84	2.8	352	112.34	20.5	0.76	NULL	NULL	NULL	1.41	1.62	4.95	109	17.4	<10.00	9.52
80	female	146.0cm	49.0Kg	80cm	88cm	0.91	159mmHg	68mmHg	4.13	4.7	152	32.3	97	215	66	31	51.1	3.84	1.09	2.79	0.91	5.38	NULL	53	4.6	252	NULL	16.5	0.69	NULL	NULL	NULL	2.19	1.39	4.27	107	19.41	17.99	9.16
72	male	168cm	69Kg	88cm	98cm	0.90	115mmHg	65mmHg	5.57	4.6	137	29.8	90.4	361	16	21	44.6	6.53	1.76	3.2	1.86	6.89	NULL	75	3.1	312	NULL	17.9	0.78	4.18	141	NULL	2.37	1.65	4.52	95.18	14.42	22.1	217.4
65	female	154cm	69.1Kg	95cm	100cm	0.95	153mmHg	95mmHg	5.11	4.29	136	31.7	95.1	190	22	16	46.9	4.05	1.44	2.82	1.19	5.34	NULL	77	2.8	439	NULL	NULL	0.87	NULL	NULL	NULL	1.93	2.34	5.79	112.7	17.04	<10.00	11.12
65	male	163.0cm	62.0Kg	85cm	99cm	0.86	141mmHg	76mmHg	5.4	4.42	135	30.5	91.2	257	20	22	41.5	4.76	0.8	2.22	1.7	5.33	NULL	91	4.5	444	91.78	16.8	0.98	NULL	NULL	NULL	1.3	1.27	5.03	71.9	20.2	16.35	115.1
68	male	168.0cm	49.0Kg	74cm	87cm	0.85	113mmHg	77mmHg	4.49	5.05	136	26.9	86.5	196	25	22	43.1	4.65	1.11	2.92	1.42	5.2	5.9	74	4.6	313	NULL	16.3	1.03	4.18	141.7	NULL	4.17	2.33	5.24	147.6	21.2	<10.00	20.1
61	male	176cm	65Kg	83cm	90cm	0.92	116mmHg	67mmHg	7.49	4.62	137	29.7	93.3	294	26	30	45.9	3.6	2.17	4.39	0.92	4.62	NULL	89	2.7	439	94.94	NULL	0.88	NULL	NULL	NULL	2.13	1.85	5.74	75.55	13.26	<10.00	9.65
69	male	169cm	67Kg	80cm	98cm	0.82	123mmHg	76mmHg	5.04	6.38	145	22.7	73.7	112	28	25	47.5	3.81	1.39	2.2	1.75	5.06	NULL	65	3.9	315	NULL	14.7	0.74	4.16	140.7	NULL	3.51	1.53	6.12	82.02	21.63	<10.00	11.99
63	male	165cm	61Kg	79cm	91cm	0.87	120mmHg	79mmHg	6.6	4.53	146	32.2	97.1	329	58	43	49.4	4.92	2.03	5.22	1.57	5.15	5.9	89	4.8	292	91.67	12.4	0.86	4.04	139.5	NULL	2.31	1.79	5.42	98.49	16.78	29.7	<9.00
61	male	170cm	59.6Kg	71cm	87cm	0.82	97mmHg	69mmHg	3.47	4.28	132	30.8	92.5	234	13	22	51.6	4.55	1.99	2.49	1.05	4.8	NULL	89	3.1	524	NULL	NULL	0.91	NULL	NULL	NULL	8.1	1.5	5.06	84.48	18.46	10.33	12.03
67	male	154cm	65Kg	98cm	101cm	0.97	147mmHg	74mmHg	8.71	5.25	166	31.6	97.3	120	39	28	48.8	3.92	0.84	2.21	2.66	6.24	5.3	88	5	461	NULL	17	0.97	NULL	NULL	NULL	4.09	1.91	5.15	79.91	14.08	13.12	28.5
75	male	169.0cm	59.0Kg	82cm	89cm	0.92	132mmHg	66mmHg	9.85	5.19	165	31.8	97.7	222	26	19	53.4	5.31	1.01	4.19	1.41	7.01	NULL	107	9.9	417	53.48	16.8	1.54	NULL	NULL	NULL	7.3	1.62	4.17	117.2	18.2	15.46	15.78
81	female	157cm	59.6Kg	88cm	93cm	0.95	116mmHg	59mmHg	4.73	4.95	152	30.7	96	81	21	19	49	4.14	1.37	1.75	1.14	9.48	5.7	84	4.6	368	NULL	12.6	0.83	NULL	NULL	NULL	0.777	1.62	4.32	87.61	14.65	<10.00	18.98
64	male	160cm	69Kg	88cm	96cm	0.92	120mmHg	76mmHg	4.9	5.15	149	28.9	90.3	255	14	21	47	6.34	1.46	2.54	2.79	6.28	5.6	NULL	4.4	NULL	NULL	11.2	NULL	NULL	NULL	NULL	1.36	1.46	4.38	84.36	18.09	13.84	<9.00
66	female	151cm	58Kg	83cm	99cm	0.84	148mmHg	90mmHg	5.41	4.63	140	30.2	94.6	193	15	20	45.3	4.7	1.52	2.85	0.72	5.29	NULL	59	4.3	244	NULL	NULL	0.72	NULL	NULL	NULL	0.965	1.73	5.04	111.4	20.16	10.09	23.07
63	male	158.0cm	53.0Kg	77cm	87cm	0.89	145mmHg	86mmHg	5.39	3.91	116	29.7	91	160	17	20	47.4	4.62	1.18	3.72	1.18	4.6	6.7	84	3.8	350	85.42	NULL	1.07	NULL	NULL	NULL	1.9	1.91	4.93	100	14.7	435.1	7.15
61	male	171cm	77Kg	88cm	101cm	0.87	111mmHg	81mmHg	5.82	5	157	31.4	95	163	22	22	48.6	4.43	1.24	3.77	1.12	7.67	NULL	46	4.2	253	NULL	NULL	0.59	NULL	NULL	NULL	2.97	1.58	4.84	88.33	16.3	12.83	<5.00
63	male	167.0cm	65.0Kg	84cm	94cm	0.89	117mmHg	71mmHg	5.17	5.63	168	29.8	93.6	249	21	20	51	4.16	1.59	1.49	0.97	6.66	6.4	70	5.2	337	NULL	NULL	0.83	NULL	NULL	NULL	3.03	1.98	5.26	115	19.45	<10.00	10.94
60	female	149cm	54Kg	82cm	87cm	0.94	112mmHg	60mmHg	7.1	5.16	156	30.2	92.6	169	21	21	47.6	4.45	1.49	3.1	0.98	4.02	NULL	54	4	283	124.58	NULL	0.63	NULL	NULL	NULL	4.71	1.61	4.46	98.22	16.79	198.6	7.52
64	male	158.0cm	64.0Kg	92cm	98cm	0.94	142mmHg	83mmHg	6.03	4.21	139	33	99.5	179	10	16	45.6	4.58	1.73	3.29	0.42	4.58	5.4	66	6	231	102.72	NULL	0.72	NULL	NULL	NULL	1.92	1.8	4.89	88.1	13.4	11.64	9.49
67	male	159.0cm	54.0Kg	75cm	89cm	0.84	114mmHg	68mmHg	7.47	5.19	149	28.7	89	239	28	24	45.8	5.33	1	2.91	1.36	4.37	7.7	87	4	350	NULL	10.3	0.84	4.04	141.2	NULL	3.92	1.51	4.31	119.7	20.39	11.9	9.37
61	female	149.0cm	44.0Kg	69cm	86cm	0.80	132mmHg	88mmHg	4.78	4.47	105	23.5	81.4	222	12	23	47.5	3.7	1.77	4.42	0.64	5.18	5.3	66	3.9	293	105.64	NULL	0.75	NULL	NULL	NULL	2.81	1.83	4.35	107.4	16.87	20.63	13.67
75	female	151cm	53Kg	83cm	89cm	0.93	118mmHg	60mmHg	6.79	4.59	145	31.6	93.5	234	27	21	50.4	4.54	1.83	4.07	0.76	4.99	NULL	62	4.5	273	NULL	NULL	0.62	NULL	NULL	NULL	1.3	1.35	4.44	92.96	17.04	248.2	27.04
65	male	168cm	69Kg	89cm	95cm	0.94	144mmHg	74mmHg	4.93	4.62	141	30.5	93.3	201	36	29	45.6	5.24	1.58	3.63	0.89	4.78	5.2	57	5.8	329	NULL	NULL	0.77	NULL	NULL	NULL	3.41	1.56	5.54	92.6	18.17	19.67	14.92
69	male	157cm	67Kg	92cm	96cm	0.96	106mmHg	60mmHg	7.79	5.28	164	31.1	91.7	201	29	27	52.4	6.35	1.56	2.72	1.06	5.85	4.9	69	6.3	311	86.38	NULL	1	NULL	NULL	NULL	0.931	1.61	4.73	96.6	16.8	24.91	13.72
61	female	150cm	54Kg	75cm	90cm	0.83	127mmHg	71mmHg	7.4	5.28	152	28.8	89.2	158	17	13	45.9	4.27	1.09	2.9	1.06	5.19	5.8	55	4.1	218	NULL	NULL	0.73	NULL	NULL	NULL	3.67	1.92	5.12	86.34	15.47	19.45	17.23
64	male	165cm	85Kg	101cm	111cm	0.91	126mmHg	74mmHg	7.69	4.45	141	31.7	98.2	170	14	21	48.6	5.37	1.26	3.16	1.06	7.82	5.4	59	4.5	302	NULL	NULL	0.77	NULL	NULL	NULL	6.93	1.7	4.92	91.29	15.69	10.09	10.56
62	female	150cm	44Kg	68cm	83cm	0.82	128mmHg	70mmHg	5.19	4.13	131	31.7	95.6	149	14	20	50.2	4.14	2.07	2.93	1.05	4.42	5.2	70	6.4	307	99.08	NULL	0.84	4.33	141.1	NULL	2.6	1.75	5.31	111.1	19.9	32.09	349.5
63	male	154.0cm	63.0Kg	87cm	90cm	0.97	111mmHg	62mmHg	4.8	4.53	142	31.3	98.2	167	18	25	48.8	5.49	1.77	3.51	0.72	5.71	NULL	69	4.8	251	NULL	NULL	0.71	NULL	NULL	NULL	2.92	1.88	5.54	101.3	17	11.04	20.52
70	female	151.0cm	43.0Kg	75cm	85cm	0.88	130mmHg	64mmHg	5.24	4.51	133	29.5	91.6	320	14	17	46.8	5.37	1.68	3.23	1.12	4.97	5.7	81	5.3	404	105.65	NULL	0.77	NULL	NULL	NULL	5.42	1.97	4.91	68.77	13.21	14.33	173.6
61	female	155.0cm	62.0Kg	87cm	98cm	0.89	142mmHg	70mmHg	7.2	4.95	154	31.1	93.7	265	28	24	48	5.05	1.16	2.99	0.75	5.7	5.8	83	4.5	296	97.66	NULL	0.83	NULL	NULL	NULL	1.89	2.59	6.71	112	18.09	14.41	7.98
60	female	157.0cm	54.0Kg	81cm	98cm	0.83	129mmHg	70mmHg	8.66	5.15	156	30.3	95	228	14	22	48.4	5.54	1.13	3.62	1.19	5.32	5.3	63	5.5	307	116.57	NULL	0.72	NULL	NULL	NULL	3.4	1.61	5.13	109	20.8	10.5	11.54
78	male	166cm	71Kg	85cm	97cm	0.88	140mmHg	67mmHg	5.88	5.2	148	28.5	86.7	205	21	21	44.9	3.33	1.1	3.7	1.02	6.15	5.4	79	4.4	323	101.65	NULL	0.81	NULL	NULL	NULL	1.3	1.72	4.67	86.9	14.6	<10.00	18.53
68	female	155cm	46Kg	64cm	83cm	0.77	144mmHg	69mmHg	3.23	4.43	140	31.6	93.5	191	30	21	40.4	4.2	0.83	3.35	1.01	4.66	5.4	68	5.2	295	97.69	NULL	0.76	NULL	NULL	NULL	1.33	1.89	5.04	117.1	20.62	17.83	22.76
68	male	160cm	51Kg	66cm	88cm	0.75	92mmHg	60mmHg	7.31	4.76	153	32.1	95.2	251	12	19	47.9	5.4	1.1	2.73	1.09	5.12	NULL	81	4.4	441	NULL	NULL	0.65	NULL	NULL	NULL	1.35	1.48	4.52	85.97	19.34	10.94	12.58
64	female	151.0cm	56.0Kg	81cm	92cm	0.88	136mmHg	78mmHg	8.68	5.92	138	23.3	74	138	14	14	53.3	2.27	1.16	4.3	0.75	6.25	5.9	87	4.6	604	88.45	NULL	0.7	3.92	141.9	NULL	4.18	1.68	5.13	92.76	17.03	11.57	10.03
61	male	168.0cm	63.0Kg	82cm	93cm	0.88	104mmHg	66mmHg	5.26	4.89	141	28.8	87.5	182	8	18	49.8	3.8	1.5	3.8	0.62	4.18	5.3	58	3.65	265	116.66	NULL	0.63	4.8	146.4	NULL	0.996	1.87	5.15	91.17	17.81	14.3	12.64
60	female	148.0cm	41.0Kg	69cm	82cm	0.84	120mmHg	67mmHg	6.33	6.11	114	18.7	59.2	309	16	17	48.9	4.38	1.34	3.28	0.6	5.16	5.3	50	4.8	266	NULL	NULL	0.63	3.92	142.7	NULL	4.07	1.56	4.31	78.49	15.24	11.03	9.91
63	male	172cm	77Kg	98cm	99cm	0.99	151mmHg	76mmHg	6.5	5.2	161	31	90	183	31	23	49.4	4.07	0.74	2.76	0.65	6.52	5.6	98	4.3	501	68.93	16.8	0.84	NULL	NULL	NULL	1.95	1.31	4.85	62.34	16.96	14.35	9.21
60	male	172cm	50Kg	64cm	78cm	0.82	102mmHg	65mmHg	6.5	5.39	161	29.9	92	270	25	21	52.5	5.59	1.49	2.21	0.59	5	5.2	68	4.5	321	NULL	NULL	0.72	NULL	NULL	NULL	2.08	1.58	4.48	117.9	18.61	13.62	176.7
61	female	149.0cm	49.0Kg	73cm	93cm	0.78	106mmHg	73mmHg	5.57	5.21	150	28.8	88.1	283	37	27	42.8	4.87	1.31	4.53	0.65	5.6	NULL	83	6.1	286	NULL	NULL	0.64	NULL	NULL	NULL	2.23	1.71	4.96	104.3	18.42	15.97	14.17
62	female	160cm	70.5Kg	87cm	100cm	0.87	137mmHg	83mmHg	6.3	4.71	148	31.4	96.6	111	17	18	43.8	5.14	1.39	3.86	1.04	5.16	5.1	99	7.7	433	88.3	NULL	0.82	NULL	NULL	NULL	1.46	1.61	4.93	107.1	19.62	<10.00	23.33
68	male	160.0cm	49.0Kg	71cm	89cm	0.80	113mmHg	69mmHg	5.69	5.95	172	28.9	88.7	223	24	23	51.9	5.05	1.05	2.85	0.64	3.93	5.7	56	2.7	276	NULL	NULL	0.66	NULL	NULL	NULL	0.89	1.87	4.56	112.8	18.08	13.79	8.34
63	female	152.0cm	48.0Kg	72cm	90cm	0.80	119mmHg	66mmHg	7.33	4.83	144	29.8	93.2	175	19	17	47.9	4.18	1.07	2.6	0.65	4.86	5.7	64	3.9	358	NULL	NULL	0.65	NULL	NULL	NULL	1.48	1.33	4.06	93.21	17.37	<10.00	13.86
62	female	157cm	57.6Kg	75cm	92cm	0.82	137mmHg	75mmHg	4	3.78	132	34.9	103.2	310	16	22	46	6.48	1.86	3.83	1.13	6.11	5.5	83	4.7	360	106.25	NULL	0.86	NULL	NULL	100.5	4	1.93	5.52	108	17.9	<10.00	103.9
66	male	162cm	62.1Kg	82cm	89cm	0.92	126mmHg	74mmHg	8.92	5.44	171	31.4	93	221	37	26	44.8	4.31	1.16	3.15	1.13	5.15	5.7	55	6	305	94.16	NULL	0.64	NULL	NULL	104.4	5.27	1.54	4.52	78.4	13.3	<10.00	13.71
76	male	168cm	83Kg	89cm	100cm	0.89	126mmHg	76mmHg	6.54	5.98	168	28.1	85.1	284	20	22	46.5	5.35	1.48	3.92	0.61	6.04	5.3	70	7.9	225	101.91	NULL	0.71	NULL	NULL	NULL	2.83	1.55	4.13	107	16	249.4	10.17
63	female	153.0cm	48.0Kg	69cm	88cm	0.78	141mmHg	85mmHg	5.95	4.04	113	28	87.1	310	17	18	44.7	4.5	1.76	2.8	0.61	4.76	NULL	51	4.2	262	NULL	NULL	0.73	NULL	NULL	NULL	7.44	1.79	4.57	119.3	15.44	11.09	15.95
64	female	145.0cm	43.0Kg	65cm	86cm	0.76	138mmHg	84mmHg	5.82	5.32	163	30.6	94	219	78	42	47.9	5.04	1.18	3.78	1.16	5.65	5.3	77	3.7	344	109.43	NULL	0.69	NULL	NULL	NULL	1.58	1.61	4.83	89.8	15.4	20.21	9.44
62	male	161.0cm	60.0Kg	83cm	94cm	0.88	130mmHg	82mmHg	8.02	4.75	148	31.2	90.5	253	25	24	43	4.29	1.34	2.71	0.6	5.25	NULL	77	4.5	372	NULL	NULL	0.73	NULL	NULL	NULL	1.48	2.14	5.71	106	15.7	<10.00	5.99
75	female	152.0cm	55.0Kg	78cm	86cm	0.91	145mmHg	75mmHg	5.22	4.49	139	31	93.3	178	17	24	45.9	5.25	1.53	4.33	0.93	5.49	5.5	79	5.9	396	NULL	NULL	0.73	NULL	NULL	NULL	1.63	1.66	5.51	86.3	14.71	12.33	18.79
60	male	173cm	68.2Kg	88cm	96cm	0.92	125mmHg	74mmHg	6.18	4.4	129	29.3	90.9	218	14	20	50.9	4.86	2.09	3.08	0.93	5.24	5.6	64	3.9	203	98.68	NULL	0.9	NULL	NULL	NULL	1.38	2.07	4.69	100.6	14.23	<10.00	13.32
62	female	154cm	59.7Kg	82cm	94cm	0.87	103mmHg	60mmHg	6.19	5.1	157	30.8	95.7	197	24	22	55.2	5.14	1.69	1.84	0.9	5.29	5.6	87	4.1	394	NULL	11.2	0.94	NULL	NULL	NULL	2.08	1.51	5.38	75.61	16.57	<10.00	8.69
71	female	159cm	59.7Kg	83cm	89cm	0.93	136mmHg	78mmHg	5.65	5.09	160	31.4	95.9	274	13	15	50.9	4.95	0.8	2.94	0.92	5.08	5.3	65	4.6	303	101.02	NULL	0.76	NULL	NULL	NULL	1.42	1.76	4.88	75.08	16.03	52.13	14.53
72	male	169cm	68Kg	86cm	94cm	0.91	139mmHg	84mmHg	4.31	4.89	136	27.8	85.1	106	17	24	51.3	3.94	1.32	3.67	0.77	4.92	5.2	65	3.7	299	NULL	NULL	0.71	NULL	NULL	NULL	0.861	1.76	6.21	90.55	19.41	<10.00	57
69	male	167.0cm	65.0Kg	85cm	91cm	0.93	134mmHg	87mmHg	4.88	5.65	165	29.2	89.6	230	73	38	49.4	6.19	2.01	3.49	0.98	4.87	5.8	71	4.5	282	80.57	NULL	0.95	NULL	NULL	NULL	3.23	1.67	4.35	107	17.2	<10.00	9.93
61	male	170cm	67.7Kg	84cm	94cm	0.89	111mmHg	64mmHg	5.01	3.9	129	33.1	99.5	211	12	18	49.2	5.01	1.75	3.42	0.7	4.79	5.2	67	3	258	NULL	12.9	0.83	NULL	NULL	NULL	5.18	2.26	6.62	134.3	22	<10.00	13.86
61	male	162.0cm	62.0Kg	82cm	94cm	0.87	139mmHg	80mmHg	4.29	5.3	164	30.9	92.3	129	16	17	43	5.53	1.17	2.75	1.21	5.23	5.4	72	3.6	278	85.58	NULL	0.68	NULL	NULL	NULL	1.3	1.78	4.58	102	17	10.46	9.65
64	female	145cm	50.1Kg	86cm	91cm	0.95	155mmHg	82mmHg	4.66	5.27	169	32.1	96.2	265	61	41	49.8	5.98	1.09	2.98	1.11	4.5	NULL	61	2.9	271	NULL	NULL	0.63	NULL	NULL	NULL	3.15	1.68	5.41	88.09	18	<10.00	8.79
64	male	172.0cm	68.0Kg	96cm	94cm	1.02	113mmHg	69mmHg	6.84	5.27	172	32.6	96.2	234	13	16	53.2	4.12	1.33	3.07	0.58	5.55	NULL	74	3.4	355	112.01	NULL	0.8	NULL	NULL	NULL	3.3	1.69	4.31	101	13.1	15.57	9.63
62	female	165cm	66.6Kg	82cm	101cm	0.81	129mmHg	81mmHg	4.37	4.18	121	28.9	92.3	147	25	21	49	2.64	1.49	3.41	1.04	5.59	5.4	66	4.1	223	112.54	NULL	0.6	NULL	NULL	NULL	1.45	1.58	4.79	103	17.1	60.4	12.09
72	male	164cm	59.5Kg	79cm	93cm	0.85	120mmHg	63mmHg	3.63	5.06	161	31.8	94.9	219	22	22	45.8	4.1	1.25	1.97	1.03	5.07	5.1	66	5.6	321	96.42	NULL	0.93	NULL	NULL	NULL	2.47	1.71	4.33	95.4	15.5	10.87	16.42
68	female	150.0cm	64.0Kg	93cm	99cm	0.94	141mmHg	71mmHg	6.28	4.76	145	30.5	87.8	218	20	20	47.9	3.77	1.16	2.8	1.1	6.22	NULL	80	3.8	259	NULL	NULL	0.81	NULL	NULL	NULL	3.12	1.75	4.85	89.22	14.9	11.52	9.97
66	female	153.0cm	48.8Kg	69cm	87cm	0.79	95mmHg	60mmHg	5.78	4.86	152	31.3	94.7	178	15	25	45.9	3.59	2.05	4.19	0.67	4.8	6	64	3.9	330	NULL	NULL	0.8	NULL	NULL	NULL	1.56	1.94	5.92	106.3	14.95	<10.00	10.16
65	male	156cm	54.1Kg	78cm	89cm	0.88	124mmHg	73mmHg	7.12	5.09	153	30.1	92.1	195	10	17	48.7	4.26	1.17	4.06	0.63	5.25	5.6	91	2.8	351	93.08	NULL	0.86	NULL	NULL	NULL	1.91	1.71	5.35	101.6	17.75	10.09	13.44
61	female	154cm	52.8Kg	75cm	87cm	0.86	98mmHg	52mmHg	5.89	4.62	132	28.6	91.3	348	7	15	48.9	4.85	1.67	3.05	1.1	5.43	7.3	74	4.3	242	NULL	NULL	0.79	3.81	143.3	NULL	1.61	2.11	5.4	97.33	16.6	<10.00	86.8
62	female	152.0cm	65.0Kg	90cm	95cm	0.95	111mmHg	67mmHg	7.52	5.63	168	29.8	90.4	273	14	20	57.8	4.44	1.67	3.08	1.15	4.86	5.6	65	2.8	311	116.26	NULL	0.88	NULL	NULL	NULL	2.86	2.12	5.35	130.4	22.08	45.54	11.86
65	female	156.0cm	58.0Kg	79cm	90cm	0.88	143mmHg	83mmHg	8.25	7	131	18.7	62.7	153	35	19	47.4	4.28	0.9	3.13	1.2	6.12	5.6	78	8.6	345	111.95	NULL	0.82	NULL	NULL	NULL	1.59	1.58	3.93	108.6	18.71	15.57	30.24
64	male	175cm	52.3Kg	66cm	87cm	0.76	117mmHg	86mmHg	6.3	4.63	153	33	98.3	319	20	22	53.7	4.13	1.92	2.36	0.76	6.76	NULL	70	4.1	266	NULL	NULL	0.68	NULL	NULL	NULL	6.18	1.83	5.49	100.9	19.36	<10.00	10.22
66	female	157.0cm	54.0Kg	81cm	91cm	0.89	138mmHg	69mmHg	6.56	4.12	130	31.6	91.3	222	23	29	47.6	5.5	1.81	4.09	0.61	4.72	NULL	88	3.9	396	NULL	NULL	0.75	NULL	NULL	NULL	1.59	1.89	4.98	110.9	22.06	33.47	10.39
71	female	165cm	62.4Kg	87cm	94cm	0.93	120mmHg	73mmHg	7.53	5.4	171	31.7	93.9	198	14	18	57.5	4.67	1.9	2.21	1.22	4.94	NULL	71	4.8	310	100.88	NULL	0.73	NULL	NULL	NULL	1.6	1.62	4.92	112.5	18.02	<10.00	11.45
74	female	151cm	54.1Kg	81cm	90cm	0.90	129mmHg	67mmHg	6.12	4.35	133	30.6	94.9	136	13	18	49.5	6	1.9	3.04	0.84	5.67	6.3	77	3.8	411	NULL	10.3	1.04	NULL	NULL	NULL	4.55	2.14	5.16	94.98	16.31	<10.00	8.59
68	female	144cm	43.8Kg	69cm	88cm	0.78	109mmHg	60mmHg	5.82	4.78	157	32.8	95.4	163	20	20	46.9	4.67	1.47	3	1.23	4.74	5.2	74	3.2	311	NULL	NULL	0.84	NULL	NULL	NULL	3.93	1.38	4.44	88.55	14.29	19.4	<9.00
66	male	171.0cm	64.3Kg	82cm	94cm	0.87	124mmHg	65mmHg	4.82	3.9	128	32.8	99	169	25	32	47	6.09	1.37	2.17	0.84	4.85	3.6	69	4.9	306	87.61	NULL	0.8	NULL	NULL	NULL	1.53	2.07	4.84	119	17.2	13.3	12.53
63	female	154cm	50.7Kg	70cm	92cm	0.76	128mmHg	65mmHg	6.33	4.83	146	30.2	91.5	220	21	20	44.1	4.91	1.6	2.67	0.56	4.73	5.6	66	3.8	242	NULL	NULL	0.81	NULL	NULL	NULL	1.39	1.87	4.64	107.7	15.84	242.2	8.95
61	female	148.0cm	46.0Kg	70cm	86cm	0.81	99mmHg	55mmHg	5.98	4.83	158	32.7	99.2	145	25	26	55.5	5.26	1.34	4.19	0.65	4.74	NULL	63	4.8	270	NULL	NULL	0.62	NULL	NULL	NULL	1.09	1.24	4.21	72.68	15.25	25.52	15.19
71	male	177cm	74.7Kg	92cm	98cm	0.94	127mmHg	88mmHg	5.74	4.87	144	29.6	89.9	204	7	17	50.1	3.12	1.22	2.19	0.65	4.69	5.3	68	3.8	319	NULL	NULL	0.93	NULL	NULL	NULL	3.9	1.9	5.12	117.4	17.93	<10.00	11.61
60	female	155cm	72.7Kg	87cm	108cm	0.81	127mmHg	82mmHg	9.59	5.65	169	29.9	86.4	157	28	23	51.8	5.95	1.41	3.32	0.76	4.21	NULL	78	8.7	294	NULL	NULL	0.97	3.92	144.2	NULL	3.1	1.39	4.26	68.16	15.66	<10.00	35.01
62	male	162.0cm	64.0Kg	84cm	95cm	0.88	120mmHg	86mmHg	5.02	4.47	136	30.4	88.1	250	27	27	47.7	6.52	1.13	4.17	0.73	5.28	NULL	59	4.4	335	NULL	NULL	0.66	NULL	NULL	NULL	2.04	1.7	4.57	88.96	15.16	16.35	11.25
65	female	149cm	42.1Kg	63cm	85cm	0.74	114mmHg	66mmHg	6.21	4.98	161	32.3	91.6	280	36	21	47.9	4.99	0.94	3.23	0.95	4.53	5.4	48	6	290	113.32	13.9	0.56	NULL	NULL	102.6	2.46	1.4	4.4	79.41	15.13	<10.00	19.66
73	female	154cm	73Kg	91cm	104cm	0.88	141mmHg	64mmHg	4.13	6.26	157	25.1	80	178	14	14	51.8	4.48	1.54	3.98	0.95	5.21	5.4	41	5.1	272	NULL	NULL	0.69	NULL	NULL	NULL	4.41	2.01	5.28	116	16.93	171.2	12.07
81	male	158.0cm	43.0Kg	74cm	78cm	0.95	156mmHg	95mmHg	7.89	5.3	163	30.8	95.1	342	53	41	44.9	5.85	1.09	3.3	0.85	4.71	5	51	6.6	226	114.25	NULL	0.64	NULL	NULL	NULL	1.4	1.71	5.11	104	16.86	21.06	10.49
63	female	150.0cm	54.0Kg	79cm	92cm	0.86	108mmHg	65mmHg	4.61	4.41	131	29.7	91.8	210	9	17	44.3	4.18	1.92	4.22	0.92	5.08	NULL	89	3.3	314	NULL	NULL	0.77	3.9	143.1	NULL	0.467	1.88	5.33	106.5	17.13	<10.00	9.69
77	male	159cm	68Kg	86cm	93cm	0.92	150mmHg	74mmHg	5.9	4.62	136	29.4	90.5	191	7	13	50.9	5.15	2.03	4.28	0.92	5.95	5.4	95	4.3	503	90.24	NULL	0.74	NULL	NULL	NULL	2.73	1.9	5.2	108.8	15.83	539.9	10.43
61	male	161cm	74Kg	88cm	97cm	0.91	137mmHg	73mmHg	6.07	4.64	135	29.1	88.6	325	9	18	47.2	5.78	2.12	1.76	0.92	5.2	NULL	92	4.7	318	NULL	NULL	0.85	NULL	NULL	NULL	3.88	2.17	6.07	106.9	17.82	37.35	5.85
62	female	152cm	47Kg	65cm	87cm	0.75	115mmHg	73mmHg	5.3	4.05	125	30.9	98.5	317	14	20	47.5	4.98	1.97	2.78	0.97	5.19	5.1	85	2.8	388	NULL	NULL	0.86	NULL	NULL	NULL	2.33	2.03	5.85	131.3	17.72	22.46	20.76
68	male	164cm	67Kg	88cm	94cm	0.94	169mmHg	79mmHg	4.06	4.04	124	30.7	94.1	127	24	27	51	5.29	1.66	2.82	1.11	5.5	5.9	64	5.8	254	81.06	16.4	0.88	NULL	NULL	100.2	7.58	1.8	5.81	92.5	18.6	11.63	15.05
60	female	158.0cm	61.0Kg	82cm	95cm	0.86	129mmHg	86mmHg	6.03	5.72	166	29	82.3	197	45	24	54.8	6.05	1.16	4.32	0.76	5.66	NULL	53	4.5	206	NULL	NULL	0.98	NULL	NULL	NULL	2.47	1.63	4.16	67.9	10.12	<10.00	15.78
74	male	161cm	76Kg	100cm	103cm	0.97	144mmHg	60mmHg	5.35	5.16	158	30.6	92.4	200	14	23	49	4.64	1.43	3.04	0.66	5.41	5.8	78	4.3	480	85.12	NULL	0.91	NULL	NULL	NULL	1.35	1.84	5.15	99.96	18.75	35.53	9.7
60	male	166cm	57Kg	75cm	87cm	0.86	135mmHg	77mmHg	5.28	4.68	150	32.1	96.2	231	20	21	51.6	4.94	1.45	4.01	1.02	4.93	5.4	75	3.5	293	NULL	12.5	0.81	NULL	NULL	NULL	5.55	1.59	4.83	75.8	15.02	<10.00	13.72
62	female	148cm	50Kg	77cm	88cm	0.88	144mmHg	77mmHg	7.57	5.03	148	29.4	89.7	142	42	31	48.5	5.91	1.04	3.96	1.02	5.86	9.2	67	8.8	234	102.1	NULL	0.79	NULL	NULL	NULL	1.31	1.74	5.29	120	19.6	<10.00	21.95
60	male	171cm	73Kg	81cm	95cm	0.85	129mmHg	74mmHg	6.83	5.15	158	30.7	93	249	23	22	52.9	4.01	1.43	2.89	0.71	5	5	64	5.5	337	109.65	NULL	0.63	NULL	NULL	NULL	3.59	1.78	4.93	92.47	15.92	<10.00	7.02
65	male	170.0cm	69.0Kg	78cm	90cm	0.87	142mmHg	83mmHg	5.52	4.52	142	31.4	96.7	245	11	15	48.7	4.11	2	1.63	0.65	6.11	NULL	58	4.9	300	NULL	NULL	0.82	NULL	NULL	NULL	2.35	1.47	4.74	68.21	14.37	11.03	8.25
60	female	158cm	52Kg	74cm	90cm	0.82	98mmHg	56mmHg	5.87	4.85	141	29.1	90.5	202	14	17	52	4.18	1.17	3.38	1.01	5.61	NULL	58	6.2	323	NULL	NULL	0.8	NULL	NULL	NULL	2.34	1.69	3.32	123.8	14.16	<10.00	16.23
66	male	159cm	64Kg	82cm	91cm	0.90	130mmHg	64mmHg	5.1	4.41	131	29.7	91.8	306	9	15	50.1	4.09	1.81	2.86	1	4.77	6.2	76	2.9	528	101.12	NULL	0.84	NULL	NULL	NULL	1.08	2.36	5.86	113	17.5	<10.00	13.76
69	male	173cm	45Kg	65cm	78cm	0.83	97mmHg	68mmHg	5.82	5.04	156	31	92.9	114	27	25	45.6	6.05	1.29	1.66	0.81	4.66	5.4	68	7	270	NULL	NULL	0.81	NULL	NULL	NULL	1.68	2.11	5.79	90.67	18.45	<10.00	15.95
62	female	137.0cm	46.0Kg	71cm	91cm	0.78	133mmHg	60mmHg	6.53	5.21	155	29.8	87.1	239	22	20	45.9	5.13	1.11	3.73	1.07	4.87	NULL	93	3.5	475	NULL	NULL	0.85	NULL	NULL	NULL	2.66	1.99	6.07	108.1	19.67	293.9	18.7
62	male	163cm	70Kg	93cm	98cm	0.95	140mmHg	88mmHg	3.92	4.14	123	29.7	90.3	192	13	16	49.6	4.94	1.77	3.57	1.07	7.73	5.3	71	2.7	280	NULL	NULL	0.7	4.76	141.3	NULL	3.12	1.26	4.76	100	18.57	<10.00	20.72
61	male	161cm	53Kg	73cm	87cm	0.84	109mmHg	63mmHg	5.06	5.42	173	31.9	91.7	135	33	30	50.1	4.85	1.04	3.26	0.72	4.92	5.8	72	4.8	330	NULL	14.2	0.79	NULL	NULL	NULL	3.53	2.35	6.37	102	16.94	<10.00	88.42
63	male	169.0cm	84.0Kg	101cm	101cm	1.00	111mmHg	58mmHg	6.62	6.41	155	24.2	79.4	165	12	16	48.1	5.08	1.52	2.7	1.07	5.15	5.7	43	8.2	277	NULL	NULL	0.88	NULL	NULL	103.1	1.5	2.5	5.2	115.9	16.94	<10.00	<9.00
60	female	156.0cm	48.0Kg	72cm	82cm	0.88	141mmHg	77mmHg	4	5.12	159	31.1	93.6	186	37	29	48.4	5.18	1.22	2.57	1.06	5.1	5.2	87	5.1	427	101.08	NULL	0.75	NULL	NULL	NULL	1.7	1.8	5.09	87.49	18.23	14.01	5.39
65	male	158cm	50Kg	72cm	82cm	0.88	120mmHg	75mmHg	5.62	3.7	120	32.4	98.9	166	14	18	47.6	5.09	2.38	3.07	0.48	4.55	NULL	66	3.5	168	NULL	NULL	0.62	NULL	NULL	NULL	1.07	1.39	4.25	64.8	12.1	<10.00	<9.00
65	female	153.0cm	46.0Kg	66cm	92cm	0.72	123mmHg	71mmHg	7.01	4.53	140	30.9	95.4	324	17	24	50.6	5.29	2.48	3.24	0.82	5.59	NULL	57	5.2	339	121.53	NULL	0.74	NULL	NULL	NULL	0.725	1.74	4.56	113.2	16.98	14.07	12.31
76	male	157cm	53Kg	80cm	85cm	0.94	131mmHg	54mmHg	4.65	5.4	163	30.2	93.1	170	74	42	50	4.9	0.95	2.46	0.82	5.34	NULL	60	5	238	NULL	17.1	0.6	NULL	NULL	NULL	1.19	1.87	5.54	109.5	18.43	<10.00	10.48
64	female	158.0cm	66.0Kg	90cm	98cm	0.92	135mmHg	81mmHg	11.45	4.58	134	29.3	91.3	252	10	14	48.1	4.34	1.29	4.05	0.85	7.56	4.9	61	5.5	244	NULL	11.6	0.66	NULL	NULL	NULL	2.2	1.96	5.57	99.75	18.24	43.43	10.94
64	female	155.0cm	40.0Kg	60cm	84cm	0.71	149mmHg	75mmHg	4.79	4.29	135	31.5	93.9	200	10	14	46.6	5.2	1.96	2.25	0.85	5.16	5.6	49	4.3	290	133.23	NULL	0.65	NULL	NULL	NULL	2.36	2.1	5.49	91.77	16.19	<10.00	<9.00
63	female	149.0cm	50.0Kg	74cm	86cm	0.86	96mmHg	54mmHg	6.39	5.05	138	27.3	86.7	239	18	20	47.7	6.39	1.61	3.42	0.51	4.46	5.3	64	5.1	220	NULL	NULL	0.97	NULL	NULL	NULL	4.52	1.69	4.75	84.64	13.42	<10.00	13.21
70	female	151cm	46Kg	68cm	82cm	0.83	125mmHg	59mmHg	7.53	4.84	152	31.4	94.2	285	13	19	52.5	4.84	2.11	3.54	0.9	4.75	NULL	90	4.9	437	101.2	NULL	0.83	NULL	NULL	NULL	1.55	1.16	4.55	76.5	18.4	<10.00	14.78
74	male	152cm	51Kg	69cm	85cm	0.81	123mmHg	61mmHg	5.8	4.43	130	29.3	95.3	239	21	14	50.4	3.92	1.77	3	0.9	4.91	6.3	80	5.6	439	94.51	NULL	0.84	NULL	NULL	NULL	2.35	1.63	5.3	94.09	18.24	161.5	13.58
68	female	162cm	57Kg	80cm	93cm	0.86	147mmHg	96mmHg	6.07	4.54	144	31.7	98.9	185	29	21	45.8	5.48	1.41	2.6	0.54	5.83	NULL	63	5.1	246	NULL	32.4	0.7	NULL	NULL	NULL	1.62	1.43	3.86	73.3	12.18	1052	247.5
75	male	164cm	50Kg	74cm	90cm	0.82	141mmHg	69mmHg	5.56	5.94	181	30.5	91.2	128	142	52	43.6	4.61	1.77	2.81	0.52	5.76	5.2	73	6	235	117.49	28	0.68	NULL	NULL	NULL	1.76	1.72	5.98	89.31	18.9	<10.00	8.25
67	male	175cm	87Kg	99cm	108cm	0.92	145mmHg	82mmHg	4.73	5.45	167	30.6	88.8	89	83	44	46.1	3.09	1.13	3.28	0.86	6.38	5.5	73	4.9	336	NULL	10.5	0.8	NULL	NULL	NULL	2.77	1.98	4.54	95.78	14.82	<10.00	<5.00
69	male	162.0cm	65.0Kg	86cm	94cm	0.91	111mmHg	64mmHg	6.98	4.33	129	29.8	92.4	158	17	18	50.6	4.57	1.59	3.7	0.86	5.05	5.1	49	4	264	NULL	16.9	0.72	NULL	NULL	NULL	4.7	2.07	4.67	92.9	16.15	<10.00	13.39
73	female	146cm	38.0Kg	69cm	88cm	0.78	125mmHg	76mmHg	6.18	5.38	155	28.8	87.9	297	55	27	50.9	5.85	0.8	2.94	0.55	5.32	5.7	128	6.6	306	53.54	13.2	0.95	NULL	NULL	NULL	4.39	1.83	4.82	115	18.1	26.08	25.65
70	female	148cm	55Kg	98cm	106cm	0.92	115mmHg	71mmHg	5.16	4.78	165	34.5	103.3	155	42	37	46.2	6.26	1.19	3.87	0.45	6.07	4.8	50	4.1	215	128.68	NULL	0.68	NULL	NULL	105.1	2.74	1.03	4.19	63.71	12.77	16.99	13.78
67	male	149cm	49Kg	83cm	93cm	0.89	146mmHg	85mmHg	6.97	4.27	130	30.4	95.6	250	45	31	45.9	5.53	1.17	2.92	0.51	5.73	NULL	67	6.2	229	104.47	NULL	0.74	NULL	NULL	NULL	1.11	1.63	4.5	95	14.8	<10.00	9.41
64	male	166.0cm	70.0Kg	86cm	93cm	0.92	131mmHg	75mmHg	6.23	4.44	145	32.7	98.9	147	36	30	44.1	3.55	1.3	2.93	2.38	7.2	5.3	73	4.7	343	80.13	13.4	0.86	NULL	NULL	NULL	2.61	1.79	5.28	103	16	<10.00	11.8
67	male	174.0cm	73.0Kg	91cm	96cm	0.95	116mmHg	66mmHg	6.27	4.19	133	31.7	97.6	146	23	28	47.3	3.26	1.5	1.88	1.99	5.24	8.2	70	4.9	308	NULL	15.8	0.81	NULL	NULL	NULL	6.75	1.64	4.93	91.24	17.13	12.4	31.66
86	male	149.0cm	38.0Kg	66cm	82cm	0.80	164mmHg	89mmHg	4.89	4.79	132	27.6	86.6	261	7	14	48.1	4.6	1.75	2.36	1.99	4.54	4.4	56	2.1	359	NULL	16.8	0.78	NULL	NULL	NULL	4.82	1.61	5.55	118.8	23.13	11.5	20.25
61	male	168cm	72Kg	93cm	101cm	0.92	141mmHg	90mmHg	5.92	4.32	144	33.3	101.4	260	20	25	47.8	6.27	1.23	3.69	2.73	5.77	5.8	104	4.9	376	70.78	12.4	0.97	NULL	NULL	NULL	1.92	2.47	6.63	93.26	14.64	<10.00	20.38
66	male	171cm	64Kg	86cm	96cm	0.90	120mmHg	74mmHg	5.13	4.36	118	27.1	87.8	239	12	19	49.7	4.23	1.65	2.71	2.22	5.28	5.4	78	4.9	424	102.9	22.3	1.07	NULL	NULL	NULL	2.46	2.08	6.35	88.22	18.31	11.94	45.8
61	male	167.0cm	79.0Kg	92cm	102cm	0.90	138mmHg	81mmHg	4.77	4.66	145	31.1	93.8	335	16	23	46.9	4.23	1.52	3.07	2.23	5.13	5.5	78	3.8	477	112.74	12.2	0.74	NULL	NULL	NULL	2.01	1.56	5.59	62.87	15.51	109.2	57.7
73	male	164.0cm	60.0Kg	90cm	93cm	0.97	153mmHg	53mmHg	5.67	4.84	147	30.4	88.8	194	10	17	47.3	3.99	1.6	2.09	2.47	5.63	5.6	80	3.4	460	109.53	NULL	0.98	NULL	NULL	NULL	1.02	1.85	5.97	147.3	23.61	<10.00	23.47
63	male	162.0cm	71.0Kg	88cm	96cm	0.92	164mmHg	98mmHg	5.07	4.86	145	29.8	90.3	189	21	22	50.2	3.75	1.04	2.22	2.47	5.34	NULL	67	5.7	483	NULL	NULL	0.72	NULL	NULL	NULL	2.8	1.97	5.31	101.1	15.73	<10.00	>600.00
66	male	159cm	60Kg	79cm	90cm	0.88	158mmHg	98mmHg	5.31	5.48	166	30.3	86.9	265	28	19	49.7	5.11	0.91	3.67	2.23	4.59	5.7	79	6.8	375	NULL	16	0.89	NULL	NULL	NULL	0.72	1.69	5.82	84.72	18.08	199.9	<9.00
72	female	143cm	61Kg	87cm	98cm	0.89	154mmHg	87mmHg	4.44	4.98	146	29.3	89.2	223	19	20	47.8	4.31	1.89	4.17	2.48	4.48	5.2	88	4.1	442	97.61	16.2	0.91	NULL	NULL	NULL	2.82	1.48	4.59	74.99	15.36	<10.00	25.71
66	female	152.0cm	53.0Kg	76cm	90cm	0.84	115mmHg	59mmHg	3.9	3.97	129	32.5	97.5	254	12	17	46.5	3.77	1.76	2.34	2.28	4.67	NULL	61	4.9	230	NULL	14.5	0.73	NULL	NULL	100.7	4.92	1.64	5.03	111.8	16.94	11.79	<9.00
64	male	172cm	75Kg	91cm	95cm	0.96	124mmHg	97mmHg	6.46	4.84	150	31	94.4	260	11	17	47.1	4.93	1.38	3.1	2.2	5.07	5.7	97	3.8	423	88.62	12.4	0.99	NULL	NULL	NULL	3.26	2.05	6.14	105	20.5	16.6	13.34
66	male	160.0cm	64.0Kg	87cm	93cm	0.94	121mmHg	78mmHg	5.23	5.52	162	29.3	88.8	274	17	18	47.5	6	1.32	2.35	2.22	4.77	NULL	67	3.2	543	NULL	NULL	0.78	NULL	NULL	NULL	4.77	1.9	5.81	92.36	18.66	<10.00	11.5
73	female	150.0cm	63.0Kg	98cm	99cm	0.99	164mmHg	87mmHg	7.29	4.58	146	31.9	95	414	19	23	48.9	6.75	1.61	1.64	2.02	5.48	5.5	99	4.4	469	82.89	10.5	0.85	NULL	NULL	NULL	3.36	1.6	4.79	84.8	12.6	17.55	71.92
62	female	159.0cm	55.0Kg	72cm	90cm	0.80	118mmHg	66mmHg	4.25	4.45	133	29.9	91.7	377	9	21	47	5.49	1.72	3.39	1.8	5.03	NULL	90	4.1	415	98.39	16.5	0.76	NULL	NULL	NULL	2.23	1.55	5.37	95.24	17.39	12.14	<9.00
69	male	168cm	62Kg	81cm	94cm	0.86	137mmHg	84mmHg	6.04	4.36	133	30.5	94	175	14	15	50.3	3.24	1.65	5.25	2.19	5.43	5.6	87	3.4	371	101.79	15.9	0.87	NULL	NULL	NULL	1.7	2.4	6.61	106.1	20.22	<10.00	<9.00
73	male	161cm	61Kg	87cm	95cm	0.92	144mmHg	82mmHg	8.21	4.63	153	33	95	266	17	18	48.8	4.54	1.29	3.25	2.05	6.25	5.4	61	4.4	386	NULL	14.1	0.81	NULL	NULL	NULL	6.79	2.78	5.23	146.1	18.25	12	<9.00
74	male	172.0cm	66.0Kg	85cm	92cm	0.92	139mmHg	83mmHg	7.29	6.11	182	29.8	85.1	147	36	24	46	4.89	1.14	3.04	1.9	5.56	4.9	46	7.7	334	130.41	19.9	0.71	NULL	NULL	NULL	1.77	1.87	5.43	77.34	13.92	11	9.83
74	male	159cm	58Kg	83cm	93cm	0.89	148mmHg	78mmHg	3.67	4.63	146	31.5	94.6	180	8	15	51.1	4.91	1.27	3.34	2.13	4.43	NULL	72	3.4	371	NULL	21	0.75	NULL	NULL	104.9	2.1	1.91	5.05	110.7	17.34	10.7	<9.00
76	female	146.0cm	48.0Kg	76cm	90cm	0.84	174mmHg	71mmHg	10.33	6.18	194	31.4	92.2	232	47	24	49.9	6.35	1.03	4.44	2.07	6.66	NULL	61	5.3	298	NULL	15.3	0.71	NULL	NULL	NULL	1.93	1.79	5.97	109.4	18.55	13.2	<9.00
60	male	175.0cm	72.0Kg	90cm	99cm	0.91	140mmHg	97mmHg	5.98	4.88	155	31.8	94.9	213	12	22	49.4	4.99	1.76	3.02	1.81	5.08	6.2	136	4.8	598	44.16	12.3	1.36	3.76	141	NULL	2.94	1.5	3.97	100	14.6	14.4	<9.00
68	female	137.0cm	54.0Kg	104cm	97cm	1.07	127mmHg	77mmHg	8.71	5.68	169	29.8	89.8	191	34	26	45.8	4.84	1.01	2.49	2.07	5.01	NULL	75	6.9	311	98.86	11.4	0.92	NULL	NULL	101.7	2.09	1.91	6	95.32	17.7	12	<9.00
65	female	148.0cm	53.0Kg	85cm	96cm	0.89	156mmHg	74mmHg	5.5	4.75	138	29.1	86.7	283	21	23	48.6	6.11	1.46	4.2	2	6.11	NULL	45	2.8	210	NULL	11	0.61	NULL	NULL	NULL	2.96	2.2	5.46	109.2	16.34	16.96	14.86
62	male	168cm	61.0Kg	81cm	96cm	0.84	125mmHg	79mmHg	7.85	4.95	144	29.1	87.9	204	18	20	49.7	4.06	1.54	3.28	1.32	4.85	NULL	89	3.2	285	NULL	16.9	0.96	4.32	141.8	NULL	2.17	1.71	5.15	77.13	15.23	18.4	16.49
61	male	166.0cm	73.0Kg	87cm	102cm	0.85	111mmHg	65mmHg	4.52	4.54	136	30	90.1	253	7	15	47.9	5.11	2.19	3.24	1.74	4.35	5.5	85	4.4	382	NULL	12.6	0.89	4.74	141.2	NULL	4.36	1.25	3.81	66.94	11.6	17.5	8.61
64	male	160.0cm	62.0Kg	92cm	95cm	0.97	135mmHg	87mmHg	7.08	5	150	30	96	239	15	14	46.5	4.74	0.95	3.29	1.47	5.39	NULL	105	5.8	442	NULL	NULL	1.14	NULL	NULL	NULL	1.74	1.96	4.95	96.29	16.13	<10.00	<9.00
74	male	170.0cm	75.0Kg	90cm	114cm	0.79	168mmHg	103mmHg	6.89	5.25	166	31.6	89.3	203	20	19	49.9	3.45	0.71	2.77	1.69	5.36	5.5	57	9.8	323	110.92	15.5	0.77	NULL	NULL	102.6	1.95	1.73	4.79	88.9	13.5	31.7	18.7
65	male	158cm	56Kg	80cm	96cm	0.83	141mmHg	82mmHg	5.56	5.41	163	30.1	91.5	106	24	24	52.1	5.71	1.07	3.19	1.57	4.23	5.5	54	7.3	287	NULL	13.2	0.78	4.22	141.4	NULL	2.81	2.77	6.75	136.3	23.35	16.5	13.74
65	female	150.0cm	67.0Kg	93cm	99cm	0.94	168mmHg	45mmHg	5.3	5.08	158	31.1	89	201	116	47	51.3	4.16	0.73	2.45	1.55	7.04	6.3	98	4.1	415	69.42	12.7	0.94	NULL	NULL	NULL	5.17	1.74	5.58	81.87	15.06	10.6	<5.00
61	male	162cm	68Kg	91cm	94cm	0.97	126mmHg	82mmHg	5.76	4.92	112	22.8	73.6	180	34	29	48.8	3.74	0.87	4.43	1.35	5.23	5.4	84	3.9	343	96.93	19.6	0.85	NULL	NULL	NULL	3.18	1.93	5.28	102.1	18.07	12.8	12.35
60	female	150.0cm	50.0Kg	78cm	87cm	0.90	183mmHg	88mmHg	5.26	5.48	129	23.5	74.5	122	12	17	44	3.66	1.01	3.23	1.35	6.57	5.6	75	5.8	381	NULL	8.8	0.89	NULL	NULL	NULL	2.94	1.35	3.98	77.95	17.28	11.7	26.08
64	male	169.0cm	79.0Kg	93cm	101cm	0.92	161mmHg	97mmHg	5.32	5.54	177	31.9	89.2	186	18	28	51	5.31	1.6	3.86	1.34	5.22	7.4	66	5.5	157	102.02	25.2	0.81	NULL	NULL	NULL	0.3	1.59	4.85	64	13.1	14.26	6.8
60	male	169.0cm	64.0Kg	73cm	91cm	0.80	136mmHg	87mmHg	5.79	4.71	146	31	91.9	247	21	26	46.4	4.89	1.35	3.14	1.37	14.05	5.5	64	4.5	321	94.61	15.4	0.81	4.62	136.5	102.4	2.06	1.75	3.92	92.6	12.3	<10.00	<9.00
68	male	173.0cm	83.0Kg	106cm	103cm	1.03	124mmHg	74mmHg	5.27	4.27	134	31.4	95.6	192	8	15	49.8	4.95	1.9	3.59	1.57	8.14	5.5	78	6.5	320	NULL	27.7	0.93	4.32	140.1	NULL	3.95	1.52	5.18	95.64	17.71	23	16.96
63	female	159.0cm	57.0Kg	81cm	94cm	0.86	111mmHg	61mmHg	4.35	4.25	126	29.6	94.1	124	11	19	45.8	5.28	1.42	2.95	1.5	4.78	5.2	101	3.7	421	72.82	10.4	1.05	4.32	141.8	101.6	2.4	1.3	4.6	67.8	14.3	10.3	13.4
62	female	160.0cm	59.0Kg	75cm	93cm	0.81	121mmHg	73mmHg	5.34	5.01	153	30.5	92.2	66	21	19	46.5	3.96	1.09	2.96	1.39	5.78	5.7	100	4.6	488	76.87	13	1.04	NULL	NULL	NULL	2.02	1.41	4.73	116.9	22.19	75.24	14.19
72	male	159cm	49Kg	71cm	83cm	0.86	112mmHg	60mmHg	7.09	5.41	160	29.6	88.7	205	11	15	44.3	4.24	0.78	2.43	1.39	5.32	4.9	97	4.1	444	NULL	13.9	0.9	4.24	142.1	NULL	4.38	1.71	5.12	82.06	13.59	11.6	<9.00
64	male	169.0cm	60.0Kg	76cm	94cm	0.81	120mmHg	85mmHg	6.83	4.84	157	32.4	97.9	171	21	21	45.6	4.94	1.07	2.94	1.64	4.77	5	87	6.5	318	101.79	13.7	0.85	NULL	NULL	NULL	1.77	1.88	4.99	69.19	12.2	21.13	<9.00
81	male	167.0cm	66.0Kg	91cm	94cm	0.97	144mmHg	64mmHg	4.91	4.92	142	28.9	90	231	18	21	51.1	3.84	1.86	3.1	1.32	4.93	NULL	58	3.9	122	NULL	21.2	0.6	NULL	NULL	NULL	2	1.45	4.84	86.86	17.67	97.6	7.16
64	female	159.0cm	62.0Kg	82cm	96cm	0.85	108mmHg	63mmHg	5.14	4.28	114	26.6	81.3	130	15	20	47.6	3.43	1.65	2.56	1.7	5.44	5.8	50	4.3	261	NULL	11.4	0.81	NULL	NULL	NULL	3.17	1.93	5.33	101.5	15.99	18.52	11
63	male	168.0cm	64.0Kg	85cm	94cm	0.90	117mmHg	73mmHg	3.45	5.08	103	20.3	67.5	216	12	17	45.4	5.1	1.65	2.43	1.7	5.01	5.3	76	5.5	367	113.95	18.1	0.8	NULL	NULL	104.3	2.71	1.6	5.17	90.6	18.2	16.58	<9.00
62	male	166cm	72Kg	85cm	100cm	0.85	117mmHg	73mmHg	6.26	5.42	157	29	87.3	246	76	32	47.6	4.05	0.77	3.35	1.41	4.75	5.7	85	5.1	302	86	22.2	0.99	NULL	NULL	102.7	0.034	1.66	4.75	77.32	16.48	16.9	<9.00
63	male	170.0cm	72.0Kg	91cm	99cm	0.92	144mmHg	86mmHg	5.04	3.93	125	31.8	100.3	247	9	15	45.8	4.85	1.97	2.12	1.24	4.68	5.9	87	5	400	NULL	14.7	0.61	NULL	NULL	104.5	2.31	1.4	4.49	96.4	15.6	19.62	10.64
67	male	175.0cm	70.0Kg	84cm	100cm	0.84	120mmHg	71mmHg	8.35	4.95	144	29.1	87.1	211	54	36	51.9	4.02	0.9	3.62	1.27	5.22	5.6	88	3.3	490	99.69	13.6	0.82	NULL	NULL	NULL	2.91	1.86	5.48	96.7	15.4	19.35	10.29
63	female	150.0cm	60.0Kg	88cm	103cm	0.85	134mmHg	74mmHg	6.61	4.57	141	30.9	90.6	188	19	22	47.7	4.69	1.28	2.59	1.29	5.22	NULL	46	3.3	269	NULL	7.4	0.63	NULL	NULL	NULL	0.934	2.6	6.93	138.8	19.46	15.85	<5.00
77	male	167.0cm	68.0Kg	90cm	101cm	0.89	137mmHg	69mmHg	8.74	4.63	159	34.3	105.2	187	47	31	43.4	6.82	2.22	3.48	1.27	5.6	NULL	93	3.9	551	90.66	12.3	0.85	NULL	NULL	NULL	3.8	2.38	5.87	111	16.9	18.07	8.11
65	male	163cm	53Kg	72cm	91cm	0.79	143mmHg	84mmHg	6.65	4.92	148	30.1	94.1	257	27	24	51.3	5.56	0.93	2.8	1.26	5.01	NULL	98	4	458	79.33	22.9	1.05	NULL	NULL	NULL	1.96	2.88	6.33	131.6	20.58	14.1	109.8
65	female	150.0cm	57.0Kg	87cm	90cm	0.97	154mmHg	90mmHg	9.18	4.45	135	30.3	90.8	197	31	32	48.4	5.44	1.37	4.01	1.29	5.13	5.7	81	6.4	368	111.76	9.9	0.78	3.66	141.9	NULL	1.75	1.93	5.59	104	16.22	12.2	329.8
61	female	164cm	55Kg	76cm	99cm	0.77	132mmHg	75mmHg	6.37	5.64	163	28.9	89.4	186	44	29	52.7	4.36	1.15	2.79	3.4	5.11	5.5	94	6.1	404	89.5	9.5	1.01	NULL	NULL	NULL	1.61	1.93	5.27	77.5	12.6	13.8	6.81
74	female	150.0cm	60.0Kg	94cm	106cm	0.89	178mmHg	94mmHg	5.41	4.83	144	29.8	89.4	210	30	27	49.1	6.61	1.26	3.06	1.29	5.88	5.4	122	6.1	314	59.6	14.7	1.2	NULL	NULL	NULL	2.35	1.89	5.18	114.9	18.26	15.28	18.45
65	male	159cm	62Kg	89cm	92cm	0.97	110mmHg	70mmHg	5.64	5.22	152	29.1	87	218	18	22	48.3	5.03	1.25	1.99	1.3	4.79	NULL	97	5.7	348	NULL	10.9	0.88	NULL	NULL	NULL	2.3	1.94	5.5	90.21	17.62	34.1	22.57
69	male	166.0cm	74.0Kg	91cm	99cm	0.92	151mmHg	84mmHg	3.81	3.74	147	39.3	113.6	271	15	25	46.3	3.24	1.05	3.09	2.9	5.25	5.4	79	3.5	412	96.77	14.3	1	NULL	NULL	NULL	1.2	1.55	5.44	93.9	17.5	16.46	<9.00
71	female	150.0cm	51.0Kg	81cm	95cm	0.85	124mmHg	72mmHg	7.04	5.46	174	31.9	96.5	188	32	27	48.5	5.41	2.44	3.63	3.64	6.09	5.2	79	5.1	450	116.98	10.8	0.85	4.38	141.3	NULL	2.96	2.52	6.63	84.62	16.13	11.4	7.34
67	female	159cm	55Kg	78cm	95cm	0.82	111mmHg	66mmHg	5.7	4.99	166	33.3	98.8	330	62	40	49.8	5.24	0.68	2.75	3.55	6.08	4.9	92	6	447	90.58	7.4	0.96	4.93	142.5	NULL	4.77	1.37	4.59	87.1	15.3	18.6	<9.00
75	female	149.0cm	55.0Kg	82cm	95cm	0.86	138mmHg	70mmHg	6.57	4.15	126	30.4	97.1	190	11	17	47.5	4.93	1.82	3.48	3.75	4.42	5.4	76	4.5	341	87.22	18.5	0.9	4.4	139.1	NULL	2.56	1.83	4.64	111	16.5	12.1	6.3
61	male	159.0cm	61.0Kg	84cm	92cm	0.91	142mmHg	77mmHg	5.6	4.24	96	22.6	77.4	408	9	13	48.3	3.99	0.94	3.15	4.91	6.05	5.7	84	3.9	367	101.11	17.6	0.83	NULL	NULL	NULL	2.16	1.88	6.57	102.2	18.64	12.8	<9.00
69	male	165.0cm	68.0Kg	85cm	93cm	0.91	162mmHg	79mmHg	7.49	6.9	150	21.7	69.9	249	25	18	52	4.77	1.28	2.28	4.89	5.55	NULL	58	4.7	346	123.41	12.4	0.86	NULL	NULL	NULL	1.07	1.86	5.64	97.8	16.9	11.1	14.09
66	female	154.0cm	57.0Kg	80cm	92cm	0.87	166mmHg	86mmHg	3.97	3.99	132	33.1	100.8	262	10	17	50	4.86	1.98	3.3	2.53	4.77	5.8	81	4.6	608	NULL	11.3	0.96	4.27	142.4	NULL	4.79	1.55	5.42	67.07	16.64	208.3	<9.00
64	male	147.0cm	54.0Kg	83cm	93cm	0.89	148mmHg	94mmHg	3.65	4.18	132	31.6	98.1	66	7	15	46.9	5.34	2.32	2.52	1.33	4.89	5.8	88	4	380	NULL	NULL	0.79	NULL	NULL	NULL	2.15	1.51	4.45	69.99	16.17	<10.00	9.02
66	female	155.0cm	68.0Kg	98cm	107cm	0.92	139mmHg	83mmHg	5.18	4.19	131	31.3	97.4	203	16	20	49.3	4.68	1.61	2.42	2.44	4.94	5.4	82	4.5	658	103.37	NULL	0.81	NULL	NULL	NULL	1.67	1.82	6.23	75.9	20.1	<10.00	<9.00
72	male	169.0cm	63.0Kg	73cm	91cm	0.80	116mmHg	70mmHg	5.04	4.4	131	29.8	93.6	224	23	17	48.8	6.24	1.47	2.81	2.01	5.15	5.4	77	3.6	470	NULL	14.9	0.76	NULL	NULL	104.6	1.56	2	5.95	98.29	16.9	13.3	<9.00
65	male	174cm	78.8Kg	90cm	104cm	0.87	110mmHg	65mmHg	3.02	4.34	136	31.3	96.8	173	97	74	45.9	5.24	1.8	2.51	0.75	5.09	5.6	54	4.6	242	NULL	NULL	0.69	NULL	NULL	NULL	6.11	1.85	5.33	107	15.76	<10.00	48.19
61	male	167.0cm	63.0Kg	81cm	91cm	0.89	127mmHg	69mmHg	5.2	4.38	131	29.9	93.4	152	14	19	53.7	4.43	1.52	2.04	1.18	4.91	5.4	73	4.6	388	115.04	NULL	0.75	NULL	NULL	100.5	2.45	1.84	5.2	94.6	14.6	19.37	8.26
65	male	164.0cm	61.0Kg	81cm	92cm	0.88	122mmHg	70mmHg	4.62	4.77	150	31.4	93.9	203	29	22	51.5	5.39	1.57	4.73	0.97	5.61	5.3	48	5.4	220	122.15	12.1	0.77	NULL	NULL	NULL	1.87	1.84	5.3	106.7	17.19	16.73	5.85
66	male	NULL	NULL	NULL	NULL	NULL	142mmHg	87mmHg	5.61	4.33	131	30.3	91	203	12	15	46.4	5.61	1.19	2.67	2.33	5.52	5.1	97	3	439	83.78	13.8	0.82	NULL	NULL	NULL	1.71	2.14	5.7	104.6	19.47	11.99	13.8
60	male	168.0cm	62.0Kg	82cm	94cm	0.87	136mmHg	89mmHg	4.87	4.53	149	32.9	98.2	171	16	20	46.2	4.32	1.63	NULL	2.73	NULL	5	72	5.9	416	NULL	18.4	0.75	NULL	NULL	NULL	2.52	1.65	5.27	88.47	16.73	14.93	<9.00
76	male	169.0cm	72.0Kg	91cm	93cm	0.98	118mmHg	62mmHg	5.67	4.89	148	30.3	92	290	9	13	47.1	5.14	2.47	2.55	1.15	8.86	5.8	87	4.8	246	74.59	NULL	0.67	NULL	NULL	NULL	2.88	1.97	4.44	125	17.9	11.05	10.4
64	male	169.0cm	67.0Kg	83cm	95cm	0.87	110mmHg	69mmHg	4.86	3.98	123	30.9	99.2	187	15	19	49.9	3.75	1.84	3.31	1.15	6.52	6.9	67	6.7	358	85.82	NULL	0.76	NULL	NULL	NULL	2.38	1.86	4.75	115.2	19.59	17.28	53.91
66	female	154cm	53Kg	85cm	87cm	0.98	118mmHg	63mmHg	4.87	4.26	120	28.2	89.9	290	11	16	46.6	6.44	1.83	4.36	0.91	6.97	5.2	83	5	366	99.04	NULL	0.9	NULL	NULL	NULL	1.73	2.1	6.26	127	20.4	52.99	11.72
62	male	167.0cm	63.0Kg	74cm	87cm	0.85	124mmHg	76mmHg	5.41	4.83	152	31.5	95	246	49	33	43.8	4.77	1.17	3.69	1.83	14.52	5.2	83	5.3	394	NULL	14.1	0.75	4.91	136	NULL	1.47	1.88	6.23	114.7	18.03	11.3	<9.00
88	male	165.0cm	53.0Kg	82cm	93cm	0.88	118mmHg	65mmHg	5.74	5.52	108	19.6	63.6	270	13	21	44.9	5.12	1.24	2.51	1.33	3.34	NULL	67	5.4	493	NULL	13.7	0.72	NULL	NULL	NULL	5.63	2.01	6.19	123.6	22.71	15.11	18.73
66	female	157.0cm	68.0Kg	100cm	96cm	1.04	118mmHg	65mmHg	5.36	4.13	126	30.5	93.7	171	10	18	47.6	5.36	1.83	3.8	1.66	6.75	NULL	88	3.6	450	64.38	10.2	1.31	NULL	NULL	NULL	3.82	1.92	6.17	65.7	14.04	13.98	15.1
64	male	156cm	59Kg	89cm	97cm	0.92	121mmHg	69mmHg	5.39	4.95	145	29.3	90.9	157	16	25	48.9	4.18	1.9	4.76	4.04	8.83	5.4	74	4.4	386	119.32	10.6	0.81	NULL	NULL	NULL	1.06	1.37	5.64	69.52	17.63	12.6	15.3
67	male	160cm	59Kg	83cm	90cm	0.92	124mmHg	68mmHg	5.37	4.6	137	29.8	93.7	284	10	17	46.8	3.8	1.81	2.88	3.12	7.01	5.7	84	4.6	404	89.73	11.6	1.02	3.92	139.6	NULL	3.36	2.34	5.77	95.23	14.1	<10.00	19.98
68	female	150cm	62.7Kg	98cm	104cm	0.94	165mmHg	98mmHg	5.89	4.42	133	30.1	94.3	287	15	32	42.9	4.52	1.43	3.41	1.21	5.36	5.1	55	4	170	115.43	NULL	0.65	NULL	NULL	NULL	2.17	1.61	4.76	75.7	14	<10.00	17.93
76	female	149.0cm	47.0Kg	73cm	83cm	0.88	170mmHg	89mmHg	6	4.9	145	29.6	86.5	263	28	20	51	4.36	0.95	3.89	2.33	5.56	NULL	95	4	501	NULL	11.6	1.25	NULL	NULL	NULL	1.73	2.22	6.24	102.3	16.5	119	9.54
62	male	161cm	66Kg	86cm	98cm	0.88	113mmHg	77mmHg	4.08	3.96	88	22.2	76.5	199	13	16	43.5	4.53	1.96	2.56	1.51	4.69	NULL	68	3.8	375	NULL	13.6	0.93	4.57	140.3	NULL	2.21	2.14	5.51	81.91	13.6	<10.00	14.09
77	male	173cm	67.1Kg	83cm	93cm	0.89	120mmHg	60mmHg	5.37	5.49	166	30.2	88.9	194	21	21	47.3	4.81	1.41	2.99	0.84	5.3	NULL	74	5.5	329	NULL	NULL	0.92	NULL	NULL	NULL	3.78	1.59	4.12	120.9	17.66	<10.00	20.53
65	male	155.0cm	54.0Kg	74cm	90cm	0.82	121mmHg	80mmHg	9.09	5.48	164	29.9	94.2	204	44	29	51.6	5.9	0.89	2.83	0.86	4.83	NULL	55	6.1	320	NULL	NULL	0.79	NULL	NULL	NULL	3.62	2.3	5.63	106.2	17.06	14.46	25.36
60	male	167cm	63.6Kg	81cm	88cm	0.92	118mmHg	76mmHg	5.32	4.96	155	31.3	89.3	183	43	31	49	4.65	0.85	2.96	0.56	5.16	5.4	60	5.9	401	NULL	NULL	0.88	NULL	NULL	NULL	4.11	1.46	4.31	66.99	13.03	13.41	6.3
74	female	156.0cm	60.0Kg	90cm	93cm	0.97	136mmHg	81mmHg	8.22	5.36	167	31.2	92.9	182	121	71	57.1	4.87	1.74	2.41	1.07	6.19	5.8	51	4.6	320	120.86	NULL	0.7	NULL	NULL	NULL	3.88	1.83	5.19	91	15.2	<10.00	10.46
66	male	159.0cm	53.0Kg	79cm	90cm	0.88	132mmHg	73mmHg	6.33	5.32	152	28.6	88.2	179	25	28	43.7	5.72	1.49	3.76	0.85	5.97	5.2	64	4.2	239	113.57	NULL	0.84	NULL	NULL	NULL	2.41	2.01	5.15	124.1	18.22	<10.00	18.54
64	female	150.0cm	55.0Kg	78cm	91cm	0.86	106mmHg	55mmHg	5.32	5.18	158	30.5	93.6	189	26	20	52.6	4.71	1.53	2.89	0.74	6.17	4.9	61	5.4	230	NULL	NULL	0.66	NULL	NULL	NULL	1.37	1.68	4.84	122.2	22.38	10.66	8.89
64	male	161cm	59.6Kg	77cm	88cm	0.87	127mmHg	71mmHg	5.01	5.57	163	29.3	91.9	200	23	20	53	4.64	1.58	2.57	1.03	4.93	5.4	77	5	400	105.65	NULL	0.71	4.53	141.1	NULL	1.02	1.31	5.2	99.8	25.4	<10.00	11.35
78	female	156cm	59.1Kg	85cm	96cm	0.89	147mmHg	97mmHg	7.39	5.52	168	30.4	93.3	220	58	42	51.2	5.15	1.24	3.56	0.61	4.56	6.7	69	4.7	429	90.79	NULL	0.83	NULL	NULL	97.5	1.84	1.87	4.19	90.15	15.23	<10.00	13.66
71	male	169.0cm	59.0Kg	79cm	85cm	0.93	114mmHg	72mmHg	5.6	4.14	127	30.7	93.2	296	11	16	46.6	6.13	1.39	1.5	1.98	5.47	5.6	89	4.3	309	76.9	11.7	1.19	NULL	NULL	NULL	1.28	1.81	4.51	100	15.5	15.7	35.22
64	female	165.0cm	58.0Kg	78cm	95cm	0.82	108mmHg	54mmHg	9.11	5.76	137	23.8	74.3	342	51	33	44.1	5.24	1.52	2.89	2.05	4.89	5.3	41	3.4	233	NULL	8.8	0.66	NULL	NULL	NULL	5.3	2.29	3.33	104.6	11.81	418	<9.00
72	female	143cm	41Kg	73cm	82cm	0.89	112mmHg	65mmHg	6.94	6.21	180	29	85.2	350	133	45	47.7	7.2	1.05	4.11	2.53	5.33	NULL	91	5.2	664	NULL	13.1	0.96	4.58	143.1	98.2	3.45	2.62	6.52	130.5	21.24	<10.00	<9.00
67	female	160cm	52Kg	79cm	90cm	0.88	102mmHg	63mmHg	4.59	4.02	125	31.1	96.5	175	12	31	46	4.9	1.55	2.82	1.49	5.68	5.6	57	6.7	293	NULL	11.3	0.78	NULL	NULL	NULL	1.25	1.76	5.01	136	23.66	12	<9.00
63	female	153cm	64Kg	82cm	98cm	0.84	126mmHg	66mmHg	4.65	4.25	130	30.6	96.9	172	13	23	49.3	5.4	2.21	3.49	1.06	7.39	6.1	69	6.2	409	110.52	NULL	0.8	NULL	NULL	NULL	4.4	2.27	5.68	103.3	18.4	11.2	16.08
66	male	168cm	63Kg	76cm	95cm	0.80	123mmHg	71mmHg	7.51	4.76	138	29	88.2	297	12	14	51.7	4.33	1.05	2.67	1.03	5.52	5.4	72	4.5	293	NULL	NULL	0.84	NULL	NULL	NULL	4.71	1.46	4.3	60.11	12.49	<10.00	18.46
64	male	152cm	52.1Kg	78cm	87cm	0.90	144mmHg	84mmHg	4.17	5.12	161	31.4	98.2	169	17	24	48.9	4.52	1.64	5	1.16	5.78	5.4	97	5	389	89.87	NULL	0.71	NULL	NULL	NULL	1.58	1.5	5.74	98.8	22.87	10.19	14.91
71	male	159cm	62Kg	90cm	92cm	0.98	121mmHg	77mmHg	6.57	6.16	175	28.4	85.1	256	39	29	51.8	3.84	1.29	3.78	0.87	4.72	NULL	56	5.1	214	122.24	NULL	0.67	NULL	NULL	NULL	2.16	1.9	5.46	100.3	20.32	10.77	<9.00
76	female	145cm	57.3Kg	87cm	94cm	0.93	108mmHg	60mmHg	5.32	5.11	156	30.5	92.4	72	24	19	52.1	4.54	1.16	2.21	1.09	5.73	5.6	74	8.7	210	78.27	NULL	0.82	NULL	NULL	NULL	4.23	1.89	4.04	89.1	11.2	<10.00	13.19
87	male	162cm	58.1Kg	83cm	86cm	0.97	132mmHg	39mmHg	4.17	5.41	152	28.1	91.5	315	18	15	50.9	3.87	1.31	1.86	0.84	5.2	6.2	74	6.1	302	NULL	34	0.89	NULL	NULL	NULL	2.26	1.46	4.94	92.56	15.27	28.2	<9.00
68	male	174cm	60Kg	71cm	92cm	0.77	129mmHg	82mmHg	7.58	4.68	149	31.8	97.4	276	22	21	49.4	4.68	1.15	2.26	1	7.27	5.6	90	4.1	412	88.55	NULL	0.78	NULL	NULL	NULL	3.06	1.8	4.89	101.6	16.02	<10.00	9.64
62	female	144cm	47Kg	80cm	84cm	0.95	138mmHg	78mmHg	6.79	5.82	175	30.1	91.4	196	37	23	48.3	4.31	0.81	2.8	1.33	10.96	5.4	106	4.3	338	76.32	12.9	0.87	4.29	140.3	NULL	4.39	1.34	4.71	68.58	18.37	12.8	5.87
77	male	160cm	65Kg	89cm	90cm	0.99	122mmHg	50mmHg	4.45	4.79	137	28.6	89.1	297	18	21	46.1	4.41	1.58	1.43	1.09	6.99	NULL	107	4.6	371	68.87	NULL	0.92	NULL	NULL	NULL	2.2	1.71	5.14	91.29	17.12	<10.00	12.43
73	female	153.0cm	55.0Kg	78cm	99cm	0.79	169mmHg	74mmHg	4.18	4.23	131	31	92.2	196	14	21	44.3	4.28	1.23	2.93	2	7.16	5.9	65	5.4	282	NULL	10.4	0.74	NULL	NULL	NULL	1.76	1.55	4.49	79.93	14.25	10.19	19.07
72	female	148.0cm	61.0Kg	96cm	101cm	0.95	145mmHg	67mmHg	8.02	4.49	132	29.4	91.1	270	7	11	43.9	3.14	1.21	3.46	1.68	10.7	5.4	45	6.1	279	NULL	13.8	0.72	NULL	NULL	NULL	5.37	1.68	5.17	106.7	16.82	16.33	18.05
76	male	162cm	60Kg	80cm	90cm	0.89	149mmHg	65mmHg	4.68	5.19	155	29.9	87.1	125	35	25	46.9	5.8	0.96	1.66	1	6.87	7.1	76	3.3	310	104.01	16.9	0.95	NULL	NULL	NULL	2.47	1.13	4.44	66.64	16.39	<10.00	12.86
62	male	158.0cm	72.0Kg	98cm	94cm	1.04	128mmHg	76mmHg	6.43	5.54	175	31.6	94.8	188	39	33	49.8	4.93	1.23	3.11	1.15	8.16	5.3	57	5.4	178	NULL	NULL	0.76	NULL	NULL	NULL	2.65	1.59	4.35	88.78	15.62	14.66	32.01
62	male	173.0cm	91.0Kg	105cm	106cm	0.99	144mmHg	88mmHg	6.06	5.17	163	31.5	92.6	207	41	25	45.7	3.97	1.46	2.86	0.54	11.24	5.4	83	3.9	345	107.75	13.3	0.75	NULL	NULL	NULL	1.48	1.47	4.75	101.2	20.97	130.2	13.63
62	female	154.0cm	51.0Kg	70cm	88cm	0.80	121mmHg	72mmHg	9.21	5.06	155	30.6	92.1	232	22	19	50.6	3.31	1.14	4.65	1.99	5.18	5.3	102	5.6	504	NULL	NULL	0.85	4.27	142.9	NULL	1.97	1.69	5.33	104.1	17.57	14.4	12.26
71	female	148cm	48.7Kg	76cm	90cm	0.84	163mmHg	69mmHg	5.54	4.07	128	31.4	97.8	245	14	16	45.9	4.98	1.44	2.4	1.16	5.51	NULL	79	5.9	358	70.32	NULL	0.93	NULL	NULL	NULL	3.32	1.71	5.01	117.4	15.82	<10.00	<9.00
77	male	152cm	54Kg	83cm	90cm	0.92	139mmHg	88mmHg	4.14	4.12	134	32.5	99.5	199	21	23	46.6	5.85	1.83	3.42	1.01	5.9	5.1	85	6.5	306	NULL	NULL	0.75	NULL	NULL	NULL	1.59	1.76	4.59	110.2	16.51	32.73	19.25
76	male	172.0cm	74.8Kg	90cm	95cm	0.95	127mmHg	66mmHg	7.33	4.53	141	31.1	93.2	190	25	29	47.4	5.62	1.22	2.64	0.95	5.36	NULL	54	5.5	235	NULL	24.6	0.68	NULL	NULL	NULL	1.34	2.2	5.26	111.2	19.52	<10.00	9.17
71	female	147.0cm	60.0Kg	88cm	94cm	0.94	153mmHg	85mmHg	5.11	4.32	139	32.2	98.6	261	16	18	46	5.18	1.77	3.46	1.97	4.92	NULL	72	4.7	290	NULL	15.9	0.78	4.22	138.3	NULL	2.57	1.74	4.69	109	16.7	12.1	8.52
68	female	150.0cm	54.0Kg	87cm	96cm	0.91	130mmHg	62mmHg	7.62	5.54	167	30.1	93	179	32	32	51.6	4.37	1.91	1.24	0.94	5.41	6	64	4.9	277	93.29	NULL	0.83	NULL	NULL	NULL	2.16	1.57	3.9	106.9	17.55	10.94	13.01
65	female	157cm	53.1Kg	81cm	84cm	0.96	116mmHg	69mmHg	8.56	5.23	154	29.4	90.8	208	10	15	48.8	4.25	1.81	3.48	1.2	12.35	5.8	82	4.8	270	95.68	12.3	0.76	NULL	NULL	NULL	1.38	1.65	4.42	103.2	15.61	>4000.00	5.12
74	male	161cm	69.5Kg	89cm	101cm	0.88	162mmHg	80mmHg	6.35	5.09	157	30.8	95.3	255	23	21	46.8	6.86	1.94	3.44	0.53	7.66	NULL	62	4.9	288	112.35	NULL	0.71	NULL	NULL	NULL	2.7	1.91	4.91	123.8	17.73	<10.00	8.06
75	female	152.0cm	61.0Kg	95cm	91cm	1.04	164mmHg	81mmHg	6.23	5.43	164	30.2	87.1	284	64	28	49.7	5.62	1.13	3.01	1.51	7.13	5.5	55	4.7	325	113.82	11.3	0.78	4.62	140.7	NULL	1.86	2.1	4.73	115.5	17.66	18.9	24.62
60	male	168.0cm	75.0Kg	89cm	100cm	0.89	129mmHg	83mmHg	6.21	4.28	138	32.2	96.7	115	53	49	44	4.87	1.73	2.7	0.64	4.2	5.2	59	5	183	NULL	NULL	0.64	4.1	142.9	NULL	5.61	1.31	4.76	77.43	15.34	22.42	10.42
63	female	159.0cm	59.0Kg	79cm	99cm	0.80	127mmHg	87mmHg	3.39	3.6	128	35.6	108.9	154	15	23	50.5	5.08	2.64	3.87	1.06	5.44	5.2	55	4.7	208	114.62	NULL	0.72	NULL	NULL	NULL	1.52	1.7	4.8	125	18.4	65.37	12.45
61	female	157.0cm	67.0Kg	93cm	102cm	0.91	147mmHg	74mmHg	4.51	5.31	152	28.6	90.2	211	13	21	48.7	4.74	1.71	4.3	1.19	5.61	4.5	48	4.3	252	114.12	NULL	0.79	NULL	NULL	NULL	3.87	2.42	6.05	135	16.4	59.44	11.23
60	female	154cm	55Kg	73cm	92cm	0.79	162mmHg	103mmHg	5.26	5.68	152	26.8	83.6	245	48	25	49	3.95	0.97	2.64	0.6	5.05	NULL	64	5.1	312	NULL	NULL	0.69	NULL	NULL	NULL	2.79	1.55	4.68	83.17	16.03	28.46	6.42
67	female	154cm	42Kg	64cm	81cm	0.79	155mmHg	88mmHg	7.83	5.14	167	32.5	95.3	274	10	17	50.8	4.84	1.58	2.41	0.87	5.05	9	74	4.1	328	89.46	NULL	0.86	NULL	NULL	NULL	2.97	1.76	5.07	86.53	15.2	16.09	13.52
72	female	148cm	57Kg	88cm	93cm	0.95	136mmHg	62mmHg	5.13	4.67	141	30.2	92.1	330	11	17	44.6	4.2	1.48	4.42	0.7	12.07	5.3	69	5.4	246	107.4	14.6	0.73	NULL	NULL	NULL	2.03	1.82	4.5	123	17.72	10.26	6.27
63	male	163.0cm	71.0Kg	93cm	95cm	0.98	136mmHg	88mmHg	7.33	4.55	149	32.7	98.2	199	22	28	47	6.03	2.37	3.43	0.73	5.19	5.5	88	2.5	434	104.72	12.8	0.78	NULL	NULL	NULL	2.67	1.52	5.38	87.05	21.71	<10.00	14.72
68	male	161cm	58.4Kg	81cm	84cm	0.96	147mmHg	60mmHg	5.75	3.94	124	31.5	95.9	140	13	13	52.7	3.86	1.69	2.27	1.14	4.39	NULL	64	4	271	NULL	25.8	0.76	NULL	NULL	NULL	8.63	1.75	4.83	92.18	15.04	252.4	8.02
71	female	151cm	68.4Kg	89cm	100cm	0.89	131mmHg	73mmHg	6.91	5.35	164	30.7	88.2	133	75	30	49.5	4.89	1.29	3.32	0.84	4.8	5	52	6.3	277	NULL	NULL	0.68	NULL	NULL	NULL	1.62	1.58	5.07	96	16.83	10.24	11.23
60	female	156cm	57Kg	76cm	88cm	0.86	146mmHg	79mmHg	6.92	5.62	152	27	85.2	162	25	17	51.4	5.08	1.08	1.81	0.81	5.46	5.3	49	5.1	234	NULL	11.8	0.62	NULL	NULL	NULL	2.66	1.88	4.91	103.2	15.6	<10.00	<5.00
74	male	166cm	61Kg	72cm	88cm	0.82	127mmHg	77mmHg	5.19	5.66	169	29.9	89.2	351	29	27	50.8	4.67	1.36	3.08	0.92	8.25	7.5	45	5.1	427	107.9	NULL	0.76	NULL	NULL	NULL	2.64	2.21	5.35	87.8	12.95	<10.00	16.37
83	female	153cm	56Kg	74cm	92cm	0.80	140mmHg	76mmHg	5.4	4.37	131	30	90.6	171	18	27	47.1	6.27	1.23	2.53	1	5.81	5.1	102	5	400	75.58	18.1	0.98	NULL	NULL	NULL	3.83	1.31	4.29	65	13.2	<10.00	14.69
71	male	151cm	57Kg	87cm	91cm	0.96	141mmHg	89mmHg	4.91	4.62	141	30.5	92.4	140	15	19	46.1	2.76	1.35	2.85	0.89	6.41	NULL	76	4	386	NULL	NULL	0.78	NULL	NULL	NULL	1.75	1.7	5.51	103.3	18.59	<10.00	25.11
66	female	148cm	55Kg	85cm	88cm	0.97	135mmHg	79mmHg	4.45	5.4	163	30.2	90.9	222	9	18	47.6	4.69	0.96	1.8	2.49	5.35	5.6	112	4	442	NULL	11.1	0.94	NULL	NULL	NULL	2.07	1.63	5.35	96.73	16.15	20.94	<9.00
68	female	150.0cm	65.0Kg	89cm	95cm	0.94	157mmHg	78mmHg	4.2	4.72	147	31.1	94.1	146	58	35	49.4	5.15	0.97	3.23	2.49	5.48	5.4	87	6	332	85.4	13.2	0.86	NULL	NULL	NULL	2.22	1.8	5.28	101.4	18.51	20.46	128
61	female	156cm	70Kg	88cm	106cm	0.83	151mmHg	93mmHg	8.19	5.75	137	23.8	79.7	213	21	20	48	4.14	1.05	3.68	2.5	5.05	NULL	89	6	517	96.29	13.5	0.88	NULL	NULL	NULL	1.19	1.82	5.42	95.2	15.7	85.9	35.1
76	female	143.0cm	45.0Kg	73cm	86cm	0.85	133mmHg	76mmHg	5.83	4.3	136	31.6	96.7	374	9	19	49.3	5.1	1.49	4.25	1.81	5.76	4.5	76	3.4	471	91.65	14.1	0.99	NULL	NULL	NULL	2.53	1.78	5.35	82.3	15.1	13.02	<9.00
66	male	160.0cm	63.0Kg	82cm	90cm	0.91	129mmHg	76mmHg	5.2	5.88	136	23.1	71.1	263	31	18	48.5	5.51	1.04	2.52	1.87	5.09	NULL	72	7.5	462	NULL	32.9	0.71	NULL	NULL	NULL	2.13	1.27	4.86	63.83	19.78	12.06	10.44
79	male	174.0cm	71.0Kg	84cm	95cm	0.88	144mmHg	90mmHg	4.19	4.77	150	31.4	95.4	164	18	27	43.6	4.16	1.81	3.21	15.18	6.59	5.2	96	6	313	69.69	13.8	0.93	NULL	NULL	NULL	1.99	1.89	5.61	81.44	15.06	10.7	<9.00
78	male	160.0cm	69.0Kg	94cm	99cm	0.95,`	166mmHg	86mmHg	4.94	5.27	162	30.7	90.3	156	31	23	48	5.58	0.79	2.41	1.55	4.78	5.4	83	6.3	436	99.74	14.8	0.79	4.18	140.7	NULL	3.92	1.46	4.35	77.93	13.02	11.9	8.1
65	male	171.0cm	70.0Kg	89cm	100cm	0.89	138mmHg	86mmHg	5.37	5.5	160	29.1	89.3	157	58	34	48.7	5.85	1.48	3.61	1.76	4.66	NULL	79	4.1	378	102.36	NULL	0.85	NULL	NULL	97.9	3.05	2.42	5.83	125.2	19.46	13.59	<9.00
76	female	150.0cm	59.0Kg	86cm	98cm	0.88	154mmHg	80mmHg	4.14	4.69	140	29.9	91.5	240	10	17	50.1	4.86	2.16	3.36	1.56	6.17	NULL	84	4.5	403	NULL	10.1	0.87	NULL	NULL	NULL	4.64	1.3	5.04	67.41	15.21	11.5	<9.00
62	male	163.0cm	71.0Kg	94cm	98cm	0.96	116mmHg	82mmHg	5.55	4.92	165	33.5	100.8	185	28	27	46	3.32	1.19	2.62	1.55	6.32	6.1	70	5.9	308	NULL	18.5	0.81	NULL	NULL	102.9	1.01	3.05	6.34	128.6	19	10.4	<9.00
65	male	164.0cm	69.0Kg	84cm	96cm	0.87	131mmHg	73mmHg	5.36	4.99	165	33.1	93.6	250	12	14	50.1	4.26	1.02	2.93	1.71	4.8	6	75	5.2	293	73.32	14.6	1.01	NULL	NULL	NULL	4.86	2.03	5.27	130	17.7	16.79	5.07
76	male	165.0cm	60.0Kg	87cm	87cm	1.00	128mmHg	69mmHg	6.43	4.73	137	29	87.9	212	14	18	46.5	4.59	1.11	4.17	1.39	5.37	5.4	84	2.5	360	99	19.7	0.82	NULL	NULL	NULL	1	1.63	4.62	83.65	14.51	10.8	14.51
71	male	158.0cm	72.0Kg	91cm	97cm	0.94	148mmHg	90mmHg	5.36	4.61	143	31	91.5	299	20	16	48.2	4.45	1.73	3.02	1.38	5.62	NULL	79	4.7	345	NULL	8.8	0.83	4.05	143.7	NULL	2.85	2	5.78	96.3	17.2	<10.00	<9.00
67	male	159.0cm	71.0Kg	99cm	99cm	1.00	168mmHg	98mmHg	6.26	4.71	136	28.9	88.7	79	31	26	52.7	5.69	0.85	2.96	1.66	10.25	4.8	60	4.9	449	111.39	12.3	0.57	NULL	NULL	NULL	3.73	1.78	4.8	96.68	16.21	15.99	193
67	male	172.0cm	74.0Kg	96cm	99cm	0.97	133mmHg	75mmHg	9.31	4.76	139	29.2	91	179	18	15	50.4	5.5	1.07	2.25	1.29	4.41	NULL	87	3.4	499	101.08	18.8	0.78	4.13	141.1	NULL	2.56	1.39	4.2	107.7	19.58	<10.00	13.28
67	female	156cm	60Kg	88cm	96cm	0.92	157mmHg	63mmHg	4.56	5.23	159	30.4	96	107	85	99	49.3	6.3	0.74	1.73	6.52	6.07	5.7	68	4.2	260	103.34	13.5	0.73	NULL	NULL	NULL	1.23	1.84	5.64	95.43	17.1	15.9	11.46
75	female	158.0cm	56.0Kg	83cm	94cm	0.88	156mmHg	80mmHg	6	4.47	138	30.9	91.5	359	22	20	45	5.07	1.53	3.44	2.42	5.53	5.5	58	3.1	298	105.74	NULL	0.84	NULL	NULL	NULL	4.38	1.76	5.38	90.6	15.7	<10.00	52.14
64	female	149.0cm	46.0Kg	76cm	86cm	0.88	105mmHg	60mmHg	4.13	4.68	90	19.2	67.7	361	16	19	45.6	4.44	1.9	2.33	0.82	4.38	NULL	79	4.8	322	NULL	NULL	0.95	3.73	145.5	NULL	4.53	2.05	4.71	127.5	16.7	27.24	7.39
76	male	159cm	62Kg	84cm	92cm	0.91	129mmHg	71mmHg	6.29	5.36	149	27.8	86.2	255	27	26	53.2	3.8	1.54	2.66	1	13.74	5.8	99	6.1	373	75.66	NULL	0.71	NULL	NULL	NULL	2	1.39	4.44	79.72	16.8	<10.00	20.19
64	male	153cm	53Kg	81cm	94cm	0.86	141mmHg	70mmHg	6.65	5.12	166	32.4	97.3	176	13	18	46.7	4.72	1.47	3.71	1.27	5.23	5.5	53	5.8	269	NULL	13.4	0.67	NULL	NULL	NULL	2.57	1.66	5.09	83.5	17.45	14.7	7.66
60	female	164cm	71Kg	94cm	97cm	0.97	139mmHg	84mmHg	5.05	4.61	136	29.5	92.2	198	19	21	52.1	5.46	1.3	2.93	0.71	5.43	5.7	53	5.8	216	NULL	NULL	0.65	NULL	NULL	NULL	4.18	1.51	4.22	80.39	13.03	<10.00	>600.00
63	male	169.0cm	57.0Kg	73cm	93cm	0.78	104mmHg	58mmHg	4.85	5.35	165	30.8	92.3	212	16	12	50.7	5.24	1.11	1.75	2.44	4.3	5.9	97	3.9	386	NULL	NULL	0.84	NULL	NULL	NULL	1.48	2.07	5.61	80.74	14.43	13.2	<9.00
81	male	NULL	NULL	NULL	NULL	NULL	131mmHg	50mmHg	5.15	4.5	142	31.6	96	201	10	18	50.5	6.06	2.1	4.32	0.77	11.92	5.3	65	4.2	276	NULL	NULL	0.93	NULL	NULL	NULL	0.029	2.48	7.28	107.1	19.48	<10.00	9.05
60	male	164cm	63Kg	82cm	94cm	0.87	130mmHg	86mmHg	6.1	5.08	153	30.1	93.3	142	20	22	47.4	4.79	0.89	3.15	1.85	4.89	5.7	88	6.8	474	NULL	13.8	0.87	NULL	NULL	NULL	3.84	1.87	6.05	87.84	18.59	11.9	<9.00
63	female	159cm	63Kg	82cm	95cm	0.86	140mmHg	88mmHg	6.24	4.82	129	26.8	86.5	185	22	23	47.1	4.4	1.66	2.75	0.96	5.15	5.7	100	5	495	76.87	NULL	0.95	NULL	NULL	NULL	2.06	1.57	4.82	71.5	14.3	<10.00	10.35
64	male	163cm	66Kg	86cm	93cm	0.92	150mmHg	86mmHg	6.14	4.51	136	30.2	100.7	139	14	21	46.7	4.8	2.55	2.72	0.97	5.03	5.8	59	5	344	NULL	NULL	0.83	3.6	143	NULL	1.05	1.86	5.02	100.9	16.09	<10.00	15.28
75	female	144cm	56.1Kg	81cm	103cm	0.79	144mmHg	65mmHg	6.47	4.63	141	30.5	96.5	269	37	24	47.5	4.01	1.52	1.83	0.84	4.86	5.1	61	4	312	105.47	NULL	0.77	NULL	NULL	NULL	2.03	1.57	4.99	96.45	16.86	<10.00	469
70	male	162cm	66Kg	86cm	97cm	0.89	129mmHg	76mmHg	3.99	4.51	133	29.5	88.5	141	13	18	56.8	4.18	1.6	3.01	1.07	5.85	5.2	87	4.4	438	NULL	NULL	0.92	NULL	NULL	NULL	1.87	1.56	4.32	87.47	15.26	<10.00	19.12
76	female	141.0cm	45.0Kg	85cm	88cm	0.97	124mmHg	59mmHg	5.65	4.93	151	30.6	90.5	205	22	21	46.4	5.33	1.23	2.48	0.78	9.31	NULL	56	3.6	196	NULL	NULL	0.76	NULL	NULL	NULL	2.26	1.17	3.83	78.05	15.27	<10.00	<5.00
60	male	157cm	61Kg	87cm	92cm	0.95	107mmHg	60mmHg	5.64	5.1	154	30.2	89.6	232	41	24	45.6	5.53	1.46	3.37	1.32	10.23	5.3	88	4.3	407	99.69	13	0.81	4.44	137.8	NULL	1.93	2.32	6.56	103.5	16.84	379	8.5
63	male	160.0cm	70.0Kg	87cm	94cm	0.93	121mmHg	75mmHg	6.96	4.85	154	31.8	96.3	201	34	25	50.5	4.44	1.69	3.67	2.03	4.86	NULL	53	4.4	253	123.6	12.3	0.6	4.33	141.6	NULL	2.99	1.74	4.71	122.6	19.44	<10.00	<9.00
62	female	161cm	55Kg	74cm	92cm	0.80	114mmHg	69mmHg	6.12	5.45	158	29	86.2	343	9	18	49.9	5.57	1.04	4.16	0.66	3.97	5.1	68	4.8	364	NULL	NULL	0.71	NULL	NULL	101.4	7.45	1.5	4.4	92.45	16.51	20.95	<5.00
61	female	151.0cm	63.0Kg	92cm	100cm	0.92	159mmHg	93mmHg	5.08	5.6	165	29.5	88.6	286	26	20	50.1	4.21	1.15	3.91	2.26	6.09	NULL	75	4.4	587	103.11	11.6	1.08	3.86	143	NULL	2.94	2.89	5.88	101.4	14.3	11.4	<9.00
72	female	154.0cm	49.0Kg	72cm	88cm	0.82	141mmHg	64mmHg	5.23	5.14	152	29.6	89.7	192	88	39	44.4	4.82	1.13	1.96	1.83	7.56	NULL	77	4	393	112.55	18.5	0.75	NULL	NULL	NULL	1.85	1.62	5.5	93.66	17.24	11.3	14.94
79	female	158cm	58Kg	82cm	94cm	0.87	114mmHg	67mmHg	4.26	4.99	138	27.7	86.2	258	8	16	49.2	4.91	2.08	2.28	1.34	5.67	5.7	94	3.9	446	84.02	12.7	0.89	NULL	NULL	NULL	2.35	1.62	4.86	95.2	17.9	47.2	<9.00
75	male	169cm	61Kg	79cm	95cm	0.83	131mmHg	75mmHg	6.62	4.49	142	31.6	96.4	248	11	17	56.3	4.55	1.3	4.44	1.11	4.83	5.4	51	3	241	107.25	NULL	0.81	NULL	NULL	NULL	3.71	2.14	5.32	99.77	14.56	15.07	19.6
72	female	155.0cm	56.0Kg	74cm	97cm	0.76	117mmHg	60mmHg	6.71	4.51	143	31.7	97.3	221	9	16	46.1	3.74	1.1	3.32	0.83	4.44	5.6	85	5.2	407	NULL	47.2	0.98	NULL	NULL	NULL	2.84	2.25	5.23	113	18.53	<10.00	6.46
62	male	157cm	55.6Kg	78cm	89cm	0.88	110mmHg	66mmHg	10.98	5.53	163	29.5	91	264	14	18	49.4	7.14	1.33	4.14	0.73	8.75	NULL	81	6	314	NULL	15.5	0.8	NULL	NULL	NULL	4.48	1.59	4.54	88.47	16.53	<10.00	146.5
61	female	158cm	69Kg	93cm	97cm	0.96	158mmHg	89mmHg	8.61	5.55	164	29.5	85.6	253	47	27	47.7	5.36	1.01	4.12	0.89	5.36	5.9	53	6.3	265	NULL	NULL	0.78	NULL	NULL	NULL	4.22	1.66	5.1	96.46	14.51	14.49	15.43
64	female	149.0cm	54.0Kg	80cm	96cm	0.83	119mmHg	82mmHg	5.93	5.13	161	31.4	95.7	179	13	15	49.6	5.6	1.08	4.32	0.44	4.55	NULL	48	4.2	261	NULL	NULL	0.56	5.07	143.3	NULL	2.93	1.98	5	121	18.29	105.5	12.17
87	male	166cm	57Kg	87cm	91cm	0.96	154mmHg	69mmHg	5.68	5.24	158	30.2	91.2	219	22	18	47.1	5.74	1.6	3.6	2.05	6.98	7	53	4.3	331	NULL	18.4	0.76	NULL	NULL	NULL	4.88	1.82	5.26	72.29	16.05	<10.00	11.18
72	female	154.0cm	55.0Kg	74cm	97cm	0.76	135mmHg	63mmHg	5.97	5.28	157	29.7	86.6	117	42	31	53.9	4.06	1.52	3.82	1.08	5.88	5.8	89	5.5	404	84.85	NULL	0.91	NULL	NULL	NULL	1.26	1.36	4.71	55.5	11.1	<10.00	10.53
82	male	155cm	53Kg	80cm	89cm	0.90	136mmHg	67mmHg	4.41	4.34	135	31.1	90.6	260	18	19	46.5	4.08	1.66	2.54	0.66	6.15	NULL	61	7.9	256	NULL	NULL	0.72	NULL	NULL	NULL	1.93	1.71	4.4	99.62	17.66	<10.00	10.97
67	female	158cm	51Kg	76cm	88cm	0.86	130mmHg	53mmHg	6.13	4.81	144	29.9	90.9	339	14	14	51.8	5.11	1.5	3.39	0.99	6.07	5.3	111	5.1	383	72.18	NULL	0.97	NULL	NULL	NULL	1.76	1.82	5.23	99.4	18	358	8.6
91	male	160.0cm	48.0Kg	82cm	90cm	0.91	103mmHg	58mmHg	6.9	5.18	163	31.5	95.4	205	41	27	51.1	6.09	1.4	2.98	1.37	4.96	5	61	7.2	283	96.94	18.3	0.77	NULL	NULL	NULL	2.3	1.63	5.15	100.5	15.91	14.38	<9.00
87	female	149cm	60Kg	101cm	105cm	0.96	151mmHg	60mmHg	6	4.95	145	29.3	93.7	180	32	25	46.5	4.66	1.39	1.86	0.54	4.82	5.3	59	3.7	234	120.16	NULL	0.64	NULL	NULL	NULL	2.62	2.19	6.04	86.77	14.83	<10.00	10.12
69	male	156.0cm	50.0Kg	70cm	90cm	0.78	132mmHg	71mmHg	5.91	4.47	125	28	86.6	204	35	28	49.1	3.7	1.15	1.22	1.93	7.44	5.7	86	4.7	537	90.96	13	0.86	NULL	NULL	NULL	1.9	1.89	5.6	82.4	14.5	12.9	<9.00
79	male	164.0cm	67.0Kg	88cm	92cm	0.96	128mmHg	68mmHg	6.33	5.15	159	30.9	89.5	280	38	27	52.4	7.11	1.36	3.2	1.34	6.6	5.7	53	5.5	323	121.88	16.7	0.63	NULL	NULL	NULL	1.24	1.51	4.57	79.36	15.32	11.3	25.48
66	female	161.0cm	64.0Kg	92cm	100cm	0.92	164mmHg	91mmHg	6.59	5.23	161	30.8	96.2	243	20	16	48.2	4.75	1.01	2.87	1.16	5.43	NULL	88	4.9	491	NULL	20	0.7	NULL	NULL	NULL	3.19	1.85	5.25	105.2	16.73	<10.00	20.29
64	female	153.0cm	56.0Kg	87cm	90cm	0.97	122mmHg	66mmHg	7.91	5.22	160	30.7	94.6	273	14	14	46.8	4.54	1.56	3.19	0.87	10.81	5.4	78	4.6	339	111.95	14.5	0.73	NULL	NULL	NULL	2.15	2.21	5.56	136	17.6	<10.00	159.1
66	male	156cm	61.5Kg	84cm	95cm	0.88	108mmHg	60mmHg	7.96	5.18	154	29.7	92.3	245	89	29	47.7	4.3	1.04	2.6	1.09	4.86	NULL	76	3.5	375	NULL	NULL	0.7	NULL	NULL	NULL	1.64	1.35	4.8	84.24	18.78	<10.00	<9.00
77	male	172.0cm	64.0Kg	82cm	91cm	0.90	98mmHg	61mmHg	6.84	5.5	161	29.3	90.7	325	30	18	43.9	6.73	1.23	2.6	1.12	6.32	5.4	101	3.3	522	73.33	NULL	0.9	NULL	NULL	NULL	1.01	1.96	5.28	97.53	16.5	11.7	17.02
62	female	162.0cm	55.0Kg	74cm	92cm	0.80	128mmHg	77mmHg	3.23	4.66	138	29.6	91.6	211	7	21	44.9	7.13	1.92	2.47	1.5	4.8	5.9	60	4.1	368	NULL	11.6	0.83	NULL	NULL	101.3	1.29	1.79	5.11	115.5	22.75	15.7	28.7
80	male	163.0cm	61.0Kg	86cm	93cm	0.92	150mmHg	74mmHg	6.17	4.67	152	32.5	94.6	154	17	22	50.1	4.7	0.83	3.73	2.47	5.22	5.5	81	7.3	513	NULL	NULL	1.15	NULL	NULL	NULL	1.26	1.75	4.67	85.11	15.41	141.2	16.96
60	male	159.0cm	66.0Kg	83cm	91cm	0.91	153mmHg	95mmHg	5.41	6.19	196	31.7	92.6	180	21	25	46.2	3.81	1.01	1.92	1.95	5.27	NULL	86	4.6	371	NULL	12.2	0.94	NULL	NULL	NULL	3.2	1.99	5.11	106.9	16.85	10.1	18.76
73	female	149cm	53Kg	79cm	90cm	0.88	115mmHg	71mmHg	6.03	4.74	149	31.4	93.9	154	14	15	45.9	4.48	1.3	3.46	1.18	4.94	5.6	49	3.7	217	NULL	NULL	0.64	NULL	NULL	NULL	5.06	1.4	4.15	124.2	20.93	<10.00	<9.00
71	male	158.0cm	49.0Kg	80cm	89cm	0.90	143mmHg	82mmHg	5.96	5.13	154	30	93	240	31	26	45.5	5.97	1.14	2.07	2.39	6.04	NULL	72	5.2	455	NULL	NULL	0.97	NULL	NULL	NULL	0.817	2.29	5.91	115.4	19.26	<10.00	88.8
66	male	168.0cm	71.0Kg	90cm	99cm	0.91	106mmHg	64mmHg	6.14	4.34	136	31.3	99.3	220	6	13	48.4	4.55	1.47	2.58	1.79	5.45	5.6	98	3.9	507	84.51	19.1	0.95	3.97	139.1	NULL	3.23	1.43	4.43	89.02	18.33	10.4	<9.00
72	female	150.0cm	50.0Kg	82cm	92cm	0.89	133mmHg	79mmHg	5.2	5.37	173	32.2	95.5	214	14	19	44.9	3.72	1.52	3.22	2.44	5.26	7	84	6.2	365	89.73	NULL	0.88	NULL	NULL	NULL	2.38	1.69	5.35	80.38	15.6	<10.00	<9.00
74	male	163.0cm	62.0Kg	84cm	94cm	0.89	135mmHg	74mmHg	6.93	4.77	139	29.1	87.2	210	11	15	46.1	5.22	1.83	4.2	2.34	6.36	6	75	2.2	301	NULL	12.7	0.85	NULL	NULL	NULL	2.31	2.11	5.36	98.55	16.65	11.46	8.11
86	female	147.0cm	60.0Kg	91cm	100cm	0.91	146mmHg	75mmHg	8.87	4.71	133	28.2	87.7	423	14	16	53.4	3.58	1.77	3.25	0.94	5	5.4	66	2.8	346	NULL	14.5	0.84	NULL	NULL	NULL	3.1	1.83	4.85	89.19	16.44	<10.00	13.5
64	male	172.0cm	73.0Kg	87cm	95cm	0.92	142mmHg	78mmHg	4.87	4.23	140	33.1	93.4	85	16	18	44.2	3.75	0.73	2.9	1.97	4.73	5.7	71	5.1	335	NULL	11.8	0.77	NULL	NULL	NULL	2.09	2.81	5.55	147.6	21.13	14.4	<9.00
72	female	147.0cm	51.0Kg	78cm	89cm	0.88	152mmHg	68mmHg	6.2	6.34	145	22.9	73.2	187	39	35	52.4	4.99	0.83	4.37	1.06	4.73	NULL	83	3.5	375	NULL	NULL	1.19	4.08	139.6	NULL	1.88	1.08	4.8	57.65	17.78	732.9	49.75
69	male	158cm	72Kg	100cm	103cm	0.97	149mmHg	97mmHg	5.55	5.55	184	33.2	95.5	201	23	18	45	4.14	1.28	2.78	0.94	5.92	NULL	60	6.6	190	NULL	NULL	0.61	NULL	NULL	NULL	1.76	1.44	3.95	90.11	13.52	<10.00	<9.00
62	male	174.0cm	59.0Kg	77cm	93cm	0.83	162mmHg	64mmHg	7.17	5.14	108	21	71	393	57	33	48.2	4.62	1.38	2.89	1.1	4.94	5.5	68	4.5	222	NULL	NULL	0.71	NULL	NULL	NULL	5.98	1.61	4.75	109.6	17.93	14.29	<9.00
74	female	147cm	46.2Kg	71cm	87cm	0.82	116mmHg	61mmHg	5.53	4.33	132	30.5	92.1	249	24	22	42.1	4.72	0.97	2.29	0.99	5.17	6	68	3.1	340	105.11	10.1	0.91	NULL	NULL	102.2	1.76	1.85	5.5	77.56	13.69	<10.00	28.78
72	male	173.0cm	80.0Kg	98cm	105cm	0.93	123mmHg	77mmHg	7.79	4.95	158	31.9	96.6	207	30	27	49.2	4.19	1.19	2.81	3.37	7.19	5.4	94	4.8	466	94.01	20.2	0.91	3.89	141.5	NULL	3	1.63	6.07	83.4	17.1	10.5	10.99
80	male	NULL	NULL	NULL	NULL	NULL	168mmHg	80mmHg	5.53	4.57	146	31.9	96.5	220	10	17	53.1	4.64	2.21	3.58	0.96	4.65	5.4	68	3.3	290	NULL	NULL	0.8	NULL	NULL	NULL	2.85	1.77	4.65	102.7	17.87	13.75	18.5
70	female	156.0cm	52.0Kg	76cm	84cm	0.90	154mmHg	83mmHg	5.01	5.73	116	20.2	63.7	277	14	18	48.6	4.12	1.53	1.56	1.93	5.37	5.6	75	4.1	386	105.31	12.1	0.8	NULL	NULL	NULL	0.874	1.69	5.09	102	15.4	231	25.21
79	male	168cm	69.2Kg	92cm	96cm	0.96	144mmHg	71mmHg	5.98	4.52	143	31.6	97.8	140	40	30	45.8	4.23	1.25	3.19	0.84	5	5.4	63	5.7	246	113.34	NULL	0.68	NULL	NULL	NULL	3.84	1.93	5.14	112.6	16.53	<10.00	16.58
73	female	152cm	55.2Kg	86cm	92cm	0.93	132mmHg	64mmHg	5.33	5.38	165	30.7	92	216	7	17	53.7	4.13	1.71	5.37	0.74	6.03	6.1	65	3.6	301	NULL	16.8	0.63	NULL	NULL	NULL	1.31	1.72	4.93	114.7	22.84	10.27	9.23
65	female	162.0cm	70.0Kg	87cm	99cm	0.88	130mmHg	68mmHg	7.89	4.51	141	31.3	94.2	211	54	26	NULL	3.64	1.47	3.3	1.39	7.35	6.6	88	5	262	NULL	9.1	0.88	NULL	NULL	98.6	4.84	2.15	5.5	104.2	16.53	48.9	<9.00
71	female	149cm	50Kg	82cm	88cm	0.93	115mmHg	65mmHg	6.4	4.92	140	28.5	89.4	234	23	20	50.7	3.81	1.19	4.28	0.71	9.87	5.2	65	6.2	214	108.37	12.4	0.7	NULL	NULL	NULL	2.33	1.56	3.82	98.32	15.33	14.57	14.35
62	female	153.0cm	59.0Kg	72cm	84cm	0.86	129mmHg	75mmHg	4.88	5.04	155	30.8	92.3	248	15	18	45.4	4.74	1.25	3.08	0.82	5.98	NULL	84	5	462	NULL	NULL	0.97	NULL	NULL	NULL	1.47	1.64	5.03	97.64	18.09	26.65	10.17
70	female	158.0cm	59.0Kg	83cm	94cm	0.88	165mmHg	97mmHg	8.39	6.38	159	24.9	72.7	280	21	22	47.1	4.71	1.13	2.97	1.93	5.23	NULL	94	4.6	422	NULL	10.6	0.86	4.57	143.4	NULL	1.75	1.46	4.71	81.6	14.9	10.7	24.27
65	female	155cm	65.3Kg	91cm	96cm	0.95	120mmHg	76mmHg	5.57	5.67	176	31	94	250	26	24	55	5.1	1.42	4.02	0.69	6.05	5.7	59	9.7	282	99.4	NULL	0.72	NULL	NULL	NULL	2.99	1.64	4.42	97.1	16.84	<10.00	11.32
62	female	156cm	52Kg	71cm	87cm	0.82	126mmHg	66mmHg	5.77	4.51	142	31.5	99.6	250	152	57	51	4.69	1.62	4.29	1.09	4.87	4.8	53	4.6	187	NULL	13.1	0.55	NULL	NULL	NULL	1.11	2.04	4.72	154	19.49	18.26	10.33
60	female	159.0cm	50.0Kg	70cm	86cm	0.81	112mmHg	80mmHg	NULL	NULL	NULL	NULL	NULL	NULL	NULL	NULL	NULL	NULL	NULL	4.56	1.04	5.17	5.7	99	NULL	539	NULL	NULL	0.92	NULL	NULL	NULL	2.11	2.22	6.08	113.1	16.8	95.66	16.65
75	female	156cm	51.7Kg	78cm	89cm	0.88	116mmHg	60mmHg	4.34	5.94	173	29.1	88.4	186	36	28	52.6	4.44	1.16	2.45	0.63	5.66	4.8	80	5.1	240	71.73	NULL	0.77	NULL	NULL	NULL	2.77	1.79	4.63	132.2	18.01	<10.00	11.03
61	female	151cm	51Kg	78cm	88cm	0.89	143mmHg	89mmHg	5.05	5.49	159	29	85.1	269	42	25	50.5	5.59	1.06	2.68	0.95	4.7	5.4	62	3.6	258	120.52	NULL	0.7	NULL	NULL	NULL	1.83	1.54	4.54	83.95	13.57	<10.00	17.42
63	female	163cm	61Kg	82cm	99cm	0.83	135mmHg	76mmHg	6.02	4.89	146	29.9	94.3	313	16	19	51.5	4.83	1.52	4.56	0.85	5.25	5.7	74	3	233	86.36	NULL	0.69	NULL	NULL	NULL	1.37	1.83	4.59	93.7	15	<10.00	11.08
81	female	147.0cm	56.0Kg	86cm	92cm	0.93	146mmHg	65mmHg	9.26	4.78	146	30.5	92.3	199	12	11	46.4	4.05	1.12	3.36	1.05	4.45	4.8	60	5.01	245	NULL	17.7	0.76	NULL	NULL	NULL	2.57	1.75	4.84	105.1	15.36	13.2	11.77
60	female	154.0cm	52.0Kg	72cm	91cm	0.79	158mmHg	79mmHg	6.59	4.43	139	31.4	96.2	287	15	17	48.1	4.83	1.42	3.01	0.95	6.04	5.4	83	5.7	280	NULL	11.7	0.7	NULL	NULL	NULL	3.58	1.48	4.38	93.57	16.66	10.36	<9.00
67	female	151cm	52.2Kg	79cm	89cm	0.89	137mmHg	76mmHg	6.49	4.86	160	32.9	101.2	153	29	30	45.8	4.07	1.53	2.86	0.84	5.44	5.4	57	3.9	214	107.85	8.2	0.59	NULL	NULL	102.9	5.21	2.28	5.34	139	18	10.72	<9.00
61	female	164cm	67Kg	80cm	94cm	0.85	102mmHg	53mmHg	7.07	4.59	143	31.2	96.5	298	12	15	47.4	4.81	1.32	3.24	0.92	6.21	5.2	99	3.1	482	92.1	14	0.94	NULL	NULL	NULL	2.71	1.77	5.01	92.06	15.99	10.28	12.09
60	male	164.0cm	80.0Kg	98cm	104cm	0.94	140mmHg	87mmHg	4.23	5.01	147	29.3	90.2	228	17	23	46.5	6.31	1.97	5.09	0.39	6.3	4.9	61	6.3	215	123.1	14.5	0.69	NULL	NULL	NULL	1.96	2.05	5.55	108	17	<10.00	19.5
74	male	169.0cm	57.0Kg	77cm	88cm	0.87	142mmHg	85mmHg	7	5.17	151	29.2	91.1	241	8	21	47	4.39	1.82	4.82	1.33	6.66	NULL	63	4.5	264	NULL	NULL	0.7	NULL	NULL	NULL	1.89	1.49	4.79	88.61	16.32	<10.00	<9.00
63	male	159.0cm	60.0Kg	79cm	94cm	0.84	152mmHg	93mmHg	4.89	6.06	134	22.1	71.8	163	22	19	46.4	4.75	1.12	1.98	1.24	5.73	5.9	102	5.3	352	69.96	NULL	0.84	NULL	NULL	NULL	1.17	1.41	5.19	77.6	17.6	19.21	>600.00
61	female	155cm	56.6Kg	80cm	93cm	0.86	113mmHg	72mmHg	5.71	6.23	120	19.3	61.3	255	13	15	45	4.59	0.95	3.01	0.99	4.45	5.5	58	5.2	282	NULL	NULL	0.72	NULL	NULL	101.6	4.24	1.5	4.93	83.68	15.37	>4000.00	13.88
64	female	156cm	52Kg	82cm	92cm	0.89	94mmHg	55mmHg	6.52	5.57	158	28.4	82.4	235	37	37	44	4.54	1.39	3.13	0.91	5.05	5.4	91	3.6	260	91.14	NULL	0.89	NULL	NULL	NULL	1.44	1.69	5.39	116	18.51	32.95	29.05
76	female	156cm	38Kg	61cm	83cm	0.73	116mmHg	72mmHg	7.38	4.48	142	31.7	100.4	248	17	16	46.8	5.36	1.12	1.14	4.27	4.82	NULL	50	3.7	181	119.11	7.8	0.65	NULL	NULL	NULL	0.913	1.74	5.38	88.1	16.3	82.8	17.87
67	male	160cm	71Kg	90cm	94cm	0.96	111mmHg	60mmHg	6.46	5.17	159	30.8	95.7	207	32	25	50.7	4.9	1.2	1.1	1.11	7.52	5.6	60	4.4	265	96.79	NULL	0.82	NULL	NULL	NULL	1.74	2.1	5.27	99.85	16.77	10.76	12.8
67	female	163cm	59Kg	84cm	89cm	0.94	126mmHg	71mmHg	5.77	4.05	132	32.6	100.7	239	14	18	46.1	4.9	1.42	3.14	1.52	5.68	NULL	68	6.4	299	NULL	16.1	0.87	NULL	NULL	NULL	4.69	1.09	3.72	69.03	16.57	14.1	17.32
81	female	148.0cm	53.0Kg	84cm	90cm	0.93	112mmHg	61mmHg	7.54	4.24	129	30.4	90.1	262	9	14	54.3	5.2	1.6	2.19	2.25	5.32	5.1	75	3.6	364	100.26	NULL	1.05	NULL	NULL	NULL	3.54	1.64	5.98	86.27	17.13	<10.00	6.59
66	female	146cm	57Kg	89cm	95cm	0.94	129mmHg	79mmHg	5.45	4.57	142	31.1	95.4	202	12	21	47.2	4.68	1.96	2.68	0.88	4.79	5.8	65	5.7	322	NULL	NULL	0.82	NULL	NULL	NULL	4.89	2.06	5.52	125	16.18	62.59	11.85
87	female	155cm	61Kg	84cm	99cm	0.85	136mmHg	60mmHg	5.41	4.14	110	26.6	86	182	8	15	46.1	4.55	1.84	1.86	0.99	5.69	5.5	113	4.1	448	73.68	NULL	0.89	NULL	NULL	NULL	2.63	1.9	6.4	112	19.3	362.6	25.33
60	female	160cm	55Kg	73cm	87cm	0.84	122mmHg	75mmHg	4.21	4.5	141	31.3	93.3	284	9	14	53.8	5.86	2.18	4.83	2.37	5.42	5.3	59	3	359	117.04	9.1	0.63	NULL	NULL	NULL	3.64	1.78	5.05	100.1	16.96	26.3	<9.00
62	male	177.0cm	80.0Kg	92cm	98cm	0.94	149mmHg	79mmHg	6.42	4.43	132	29.8	94.1	154	37	37	50.4	8.07	1.45	4.5	0.43	4.83	NULL	41	3.4	274	NULL	NULL	0.61	4.25	141.6	NULL	4.81	2.32	5.92	102	18.79	<10.00	19.08
61	female	165cm	48Kg	65cm	89cm	0.73	126mmHg	75mmHg	9.99	4.45	135	30.3	93.5	296	13	16	53.4	4.13	1.19	4.46	0.59	5.28	5.4	96	6.3	340	NULL	10.1	0.85	NULL	NULL	NULL	1.02	1.47	5.02	107.7	18.53	16.22	22.19
71	female	155cm	52Kg	75cm	89cm	0.84	149mmHg	62mmHg	5.34	4.59	159	34.6	102.6	164	24	29	44.2	4.06	1.22	2.59	0.95	4.39	NULL	94	5.9	505	NULL	NULL	0.94	NULL	NULL	NULL	1.64	1.48	4.46	92.63	16.59	<10.00	12.15
64	female	150cm	53.9Kg	81cm	90cm	0.90	128mmHg	69mmHg	4.54	4.53	136	30	92.3	189	34	25	46.5	5.82	1.62	2.69	1.1	4.82	NULL	90	4.4	474	NULL	NULL	1.57	4.1	143.1	NULL	1.68	1.51	4.11	104.4	20.74	335	30.92
64	female	158cm	50Kg	74cm	85cm	0.87	122mmHg	76mmHg	7.54	4.92	156	31.7	95.3	183	23	22	47.2	6.69	0.92	3.29	0.99	7.06	6	59	3.7	297	NULL	NULL	0.74	NULL	NULL	NULL	2.41	2.18	5.45	117.7	16.91	14.22	10.86
79	male	163.0cm	63.0Kg	90cm	92cm	0.98	142mmHg	71mmHg	12.72	5.81	187	32.2	95.9	238	47	30	48.9	4.05	0.89	2.95	0.53	7.94	5.2	79	4.5	495	NULL	NULL	0.72	NULL	NULL	NULL	1.66	1.65	5.22	74.46	23.64	13.63	36.71
60	female	156cm	59Kg	73cm	93cm	0.78	133mmHg	73mmHg	5.58	4.78	138	28.9	91.4	218	11	14	46.7	3.77	1.72	3.3	1	5.59	NULL	74	3.3	343	NULL	NULL	0.65	NULL	NULL	NULL	1.29	1.64	5.01	87.6	17.1	<10.00	12.08
63	female	160.0cm	60.0Kg	82cm	93cm	0.88	138mmHg	85mmHg	7.15	5.38	165	30.7	91.8	279	7	13	51	5.33	0.92	4.46	3.56	5.44	5	82	3.2	347	102.64	11.7	0.96	NULL	NULL	NULL	2.06	1.99	5.5	124	18.4	250	9.24
61	female	153cm	50.7Kg	71cm	90cm	0.79	122mmHg	77mmHg	6.05	4.66	139	29.8	94.8	192	23	26	50.4	6.32	1.68	2.96	0.69	5.24	5.3	72	5.4	307	87.41	NULL	0.68	NULL	NULL	NULL	2.55	1.65	4.35	100.2	15.07	<10.00	62.83
60	male	160.0cm	67.0Kg	89cm	97cm	0.92	117mmHg	67mmHg	6.12	5.99	116	19.4	64.8	196	15	12	47	4.11	0.96	3.04	0.93	4.42	6.1	67	4	311	NULL	NULL	1.14	NULL	NULL	NULL	5.26	1.93	4.64	110.8	16.34	10.27	<9.00
60	female	157.0cm	65.0Kg	90cm	103cm	0.87	129mmHg	79mmHg	5.95	4.69	152	32.4	98.7	121	57	36	43.3	5.07	1.16	3.65	3.24	5.7	5.2	60	10.4	292	99.55	9.9	0.97	NULL	NULL	NULL	3.26	1.75	4.97	83.9	14.7	20.97	9.84
62	female	160.0cm	58.0Kg	77cm	91cm	0.85	151mmHg	84mmHg	4.86	4.67	141	30.2	90.4	218	10	19	51.5	3.56	1.19	4.17	1.31	7.54	NULL	92	4.2	406	NULL	8.4	0.82	NULL	NULL	NULL	5.14	1.78	5.38	94.85	18.12	14.98	11.45
82	female	150.0cm	54.0Kg	91cm	96cm	0.95	131mmHg	60mmHg	4.21	4.22	125	29.6	94.8	188	16	14	47.5	2.67	1.53	1.23	0.49	8.02	5.3	65	2.8	283	103.17	NULL	0.73	NULL	NULL	NULL	3.86	1.58	5.09	73.92	14.36	10.81	6.98
61	female	163cm	64Kg	84cm	91cm	0.92	125mmHg	73mmHg	6.79	5.65	139	24.6	77.9	254	23	20	49.5	6.5	2.04	2.87	0.69	4.51	5.6	51	4.6	313	NULL	NULL	0.7	NULL	NULL	NULL	2.85	1.58	5.11	77.45	20.76	10.63	14.62
66	female	151.0cm	53.0Kg	89cm	96cm	0.93	153mmHg	72mmHg	7.02	4.52	137	30.3	94	175	42	33	47.8	6.26	1.36	3.72	1.32	6.26	5.6	78	6.2	399	107.33	7.4	0.79	NULL	NULL	NULL	2.94	1.64	4.88	84.31	13.93	14.95	<9.00
63	male	172.0cm	72.0Kg	88cm	96cm	0.92	112mmHg	60mmHg	7.31	4.61	140	30.4	96.5	173	15	17	48.3	4.54	1.53	2.14	0.88	6.49	NULL	59	4.6	305	117.65	NULL	0.73	NULL	NULL	NULL	3.95	2.14	4.65	116.9	15.86	<10.00	25.3
68	female	156cm	66.5Kg	94cm	98cm	0.96	130mmHg	67mmHg	6.41	4.77	150	31.4	97.7	283	13	17	46.8	7.87	2.11	2.13	0.77	5.27	5.5	51	6.5	334	129.65	NULL	0.66	NULL	NULL	NULL	2.48	1.65	4.39	109.4	17.01	<10.00	8.77
66	male	164cm	68Kg	85cm	90cm	0.94	134mmHg	75mmHg	5.12	4.08	132	32.4	99	123	18	26	49.5	5.47	2.63	2.1	0.88	5.6	5.4	55	4.7	245	111.45	9.5	0.77	NULL	NULL	NULL	1.03	1.77	5.17	108.3	18.62	<10.00	8.12
68	female	157cm	62Kg	82cm	93cm	0.88	121mmHg	83mmHg	6.67	4.14	132	31.9	99	62	38	37	49.3	4.76	1.79	2.07	1.07	9.06	5.9	72	8.4	334	NULL	12.4	0.92	NULL	NULL	NULL	0.6	1.77	5.46	78.3	15.41	<10.00	11.31
61	female	155cm	44Kg	63cm	84cm	0.75	126mmHg	82mmHg	4.46	4.86	153	31.5	94.4	167	26	25	46.8	5.58	1	3.82	2.36	8.91	6	68	5.2	300	NULL	8.8	0.9	NULL	NULL	102.3	11.59	1.99	4.19	80.92	14.22	40.32	<9.00
71	female	157.0cm	59.0Kg	79cm	95cm	0.83	134mmHg	70mmHg	5.71	4.71	140	29.7	93.8	164	10	15	51.4	4.1	1.81	3.44	0.66	6	5.3	51	3.9	253	121.71	NULL	0.63	NULL	NULL	99.9	2.25	1.67	4.6	84.71	14.06	31.04	15.66
61	female	150.0cm	58.0Kg	79cm	90cm	0.88	119mmHg	70mmHg	7.24	5.39	157	29.1	88.5	209	72	41	52	5.54	0.87	2.72	1.32	5.21	NULL	82	5.7	304	70.11	10.9	0.85	NULL	NULL	NULL	5.71	1.78	4.49	86	14.7	139	7.25
70	female	153cm	62Kg	83cm	91cm	0.91	109mmHg	57mmHg	7.86	4.14	122	29.5	95.2	157	14	20	42.6	4.28	1.87	3.47	0.89	7.1	NULL	63	6.1	222	NULL	11.4	0.98	NULL	NULL	NULL	1.97	1.81	5.06	126.8	18.43	<10.00	51.78
70	male	161.0cm	46.0Kg	73cm	86cm	0.85	98mmHg	64mmHg	7.15	6.36	190	29.9	87.1	214	43	30	51.4	6.92	1.08	3.38	2	4.43	NULL	65	4.8	349	NULL	14.4	0.71	NULL	NULL	NULL	1.72	1.58	5.09	74.55	15.17	11.1	28.1
63	female	162cm	61Kg	74cm	89cm	0.83	134mmHg	75mmHg	7.7	5.35	170	31.8	96.4	308	11	17	50.4	5.92	1.52	4.4	0.87	7.59	5.1	57	4	237	122.39	NULL	0.67	NULL	NULL	NULL	1.85	1.45	5.01	86.73	14.88	140.8	17.8
69	female	NULL	NULL	NULL	NULL	NULL	139mmHg	80mmHg	5.64	5.14	158	30.7	92.6	243	54	27	49.6	3.91	1.35	3.02	1.13	6.35	5	40	3.2	294	NULL	15.7	0.62	NULL	NULL	NULL	5.9	1.76	4.99	84.09	15.39	<10.00	<5.00
60	female	162cm	68.9Kg	91cm	93cm	0.98	144mmHg	66mmHg	5.76	5.08	147	28.9	88.4	253	31	27	52.2	2.99	1.47	3.64	0.74	5.69	5.6	60	3.2	285	NULL	13.3	0.78	NULL	NULL	NULL	1.93	1.79	4.45	107.1	17.43	<10.00	6.61
60	female	149.0cm	48.0Kg	73cm	85cm	0.86	106mmHg	58mmHg	4.56	5.27	162	30.7	91.8	268	44	26	49	5.05	1.19	1.64	1.83	6.44	5.3	81	4.3	402	96.43	10.3	0.93	NULL	NULL	NULL	1.83	2.11	4.98	111.7	16.97	16.22	<9.00
66	female	155cm	64Kg	88cm	97cm	0.91	130mmHg	79mmHg	6.8	4.31	131	30.4	94.7	252	16	21	46.4	4.99	1.53	3.76	0.81	4.63	NULL	52	4.2	239	NULL	NULL	0.79	NULL	NULL	102	1.55	1.83	4.75	120	17.98	611.9	49.72
60	female	150cm	74.0Kg	97cm	112cm	0.87	152mmHg	102mmHg	5.74	5	158	31.6	91.2	209	15	22	47.8	6.05	1.15	2.71	1.41	5.97	5.6	90	6.4	430	92.36	13.5	0.9	4.23	144.1	NULL	1.04	1.78	5.63	95.6	18.9	12.7	21.26
65	female	165.0cm	78.0Kg	99cm	99cm	1.00	165mmHg	87mmHg	5.11	6.74	153	22.7	75.2	213	15	18	48	4.91	1.1	1.7	1.44	5.66	5.5	76	3.9	472	NULL	12.3	0.75	NULL	NULL	101.4	1.45	2.31	6.84	128.3	20.35	69.6	13.4
63	male	164cm	66Kg	90cm	100cm	0.90	131mmHg	89mmHg	3.86	4.15	126	30.4	96.1	167	9	12	43.5	4.49	1.45	2.18	0.55	4.71	5.7	65	6.2	270	96.85	13	0.72	NULL	NULL	NULL	2.91	1.54	4.14	93	15.3	<10.00	12.17
62	female	158.0cm	66.0Kg	89cm	106cm	0.84	127mmHg	89mmHg	5.7	5.25	165	31.4	96.4	263	7	18	49.3	6.53	1.3	4.29	1.8	5.02	5.9	67	3.7	265	NULL	14.9	0.85	NULL	NULL	NULL	5.57	1.89	5.35	90.69	13.81	12.62	15.3
61	male	161cm	61Kg	80cm	92cm	0.87	137mmHg	83mmHg	8.87	5.47	152	27.8	80.4	289	15	18	48.9	4.37	1.28	2.37	2.69	4.44	5.3	52	2.8	364	NULL	13.2	0.71	NULL	NULL	NULL	2.41	1.39	4.75	75.19	15.75	<10.00	11.49
66	male	167cm	76.7Kg	95cm	97cm	0.98	130mmHg	77mmHg	5.26	4.63	138	29.8	91.1	168	23	20	47.5	7.29	1.36	1.37	0.84	5.3	NULL	75	5.3	379	NULL	NULL	0.87	NULL	NULL	NULL	1.5	1.45	5.51	67.8	15.42	<10.00	18.45
78	female	153cm	59Kg	84cm	88cm	0.95	123mmHg	58mmHg	6.4	4.91	150	30.5	95.1	205	44	25	43.6	4.38	1.15	3.13	1.09	5.44	NULL	51	5.8	350	NULL	NULL	0.66	NULL	NULL	NULL	3.26	2.04	5.2	106.2	16.25	10.5	8.79
66	female	151.0cm	63.0Kg	86cm	101cm	0.85	148mmHg	90mmHg	3.71	4.27	136	31.9	98.4	203	80	50	45.6	4.88	1.88	3.84	0.8	5.12	5.3	100	4	412	81.32	NULL	0.76	NULL	NULL	NULL	4.82	1.06	4.65	64.69	17.29	<10.00	12.98
66	female	151cm	54.2Kg	72cm	89cm	0.81	128mmHg	70mmHg	6.15	5.39	160	29.7	89.2	253	38	30	49	5.18	1.08	1.56	0.73	6.5	NULL	40	3.8	267	NULL	15.5	0.61	NULL	NULL	NULL	4.15	1.83	4.85	99.8	14.73	<10.00	11.77
64	female	157cm	60Kg	79cm	87cm	0.91	116mmHg	72mmHg	3.05	4.82	155	32.2	92.1	116	25	22	47.3	4.04	1.39	3.66	0.78	5.97	5.5	86	7.4	416	NULL	NULL	0.86	5.18	140.9	NULL	2.75	1.7	5.49	94.1	19.71	<10.00	9.25
60	female	152.0cm	61.0Kg	84cm	98cm	0.86	133mmHg	71mmHg	6.78	5.95	171	28.7	88.2	183	77	26	42.7	4.52	0.86	2.89	1.8	5.74	5.4	83	6	449	104.77	19.3	0.8	NULL	NULL	NULL	1.67	1.52	5.68	73.8	19.4	192.9	<9.00
74	female	152cm	62.5Kg	83cm	97cm	0.86	128mmHg	57mmHg	5.3	4.84	138	28.5	84.5	180	16	20	51.9	4.35	1.5	3.34	1.17	5.65	NULL	85	3.4	404	NULL	15.4	0.73	NULL	NULL	NULL	2.6	2.34	5.9	131.1	18.17	12.46	6.17
64	female	162cm	57.6Kg	74cm	88cm	0.84	138mmHg	74mmHg	7.01	4.29	134	31.2	91.6	247	28	25	48.1	5.02	1.72	3.18	0.56	5.59	5.2	48	5.1	330	NULL	NULL	0.57	NULL	NULL	NULL	1.08	1.15	3.61	86.27	15.78	<10.00	92.96
75	female	156cm	76.9Kg	94cm	102cm	0.92	154mmHg	80mmHg	6.72	4.38	133	30.4	93.4	161	21	23	48.3	5.28	1.24	3.64	0.53	5.18	5.2	64	6.2	191	109.65	NULL	0.56	NULL	NULL	NULL	4.43	1.36	3.69	87.79	16.36	<10.00	9.75
60	female	163cm	63Kg	80cm	96cm	0.83	113mmHg	80mmHg	4.29	4.63	138	29.8	90.7	184	29	22	50.5	4.21	1.72	3.5	2.26	4.83	5.4	77	3.9	409	NULL	12.6	0.78	NULL	NULL	NULL	1.89	1.95	5.73	97.57	19.98	10.8	24
61	female	155cm	49Kg	78cm	92cm	0.85	124mmHg	78mmHg	5.48	4.25	126	29.6	90.6	210	5	12	46.4	4.52	1.54	3.57	2.27	5.02	5.5	85	3.5	478	NULL	12	0.82	NULL	NULL	NULL	4.6	2.48	6.36	115.4	20.45	<10.00	<9.00
69	female	157cm	49.5Kg	67cm	94cm	0.71	146mmHg	68mmHg	6.02	4.8	148	30.8	93.3	260	32	25	45.5	5.18	1.32	2.29	1.05	4.89	6.1	39	5.4	294	NULL	NULL	0.73	NULL	NULL	NULL	2.01	2.04	5.29	98.24	14.58	12.29	<9.00
60	female	165cm	53.4Kg	75cm	90cm	0.83	111mmHg	61mmHg	11.58	6.37	141	22.1	69.9	270	87	31	42	5.17	0.97	3.47	1.2	5.29	5.3	84	6.1	339	NULL	NULL	0.92	NULL	NULL	NULL	1.81	1.84	5.21	83.64	16.84	<10.00	17.71
61	male	169.0cm	61.0Kg	85cm	92cm	0.92	125mmHg	79mmHg	4.5	4.41	141	32	98.9	81	56	39	51.9	4.71	1.39	2.79	1.17	5.44	5.3	78	4.2	370	NULL	NULL	0.74	NULL	NULL	NULL	2.48	1.67	4.3	100.9	15.39	18.04	11.9
62	female	146cm	60Kg	85cm	93cm	0.91	142mmHg	74mmHg	5.68	4.43	131	29.6	88	303	8	18	48.3	4.6	1.8	3.15	0.55	6.78	5.2	53	3.4	257	NULL	NULL	0.59	NULL	NULL	NULL	2.85	1.78	4.41	108.3	14.81	931.7	<9.00
64	female	153cm	57.6Kg	75cm	98cm	0.77	152mmHg	93mmHg	5.2	4.75	150	31.6	95.6	160	16	23	48.7	3.9	1.56	2.35	0.76	5.94	5.2	85	5.5	402	96.23	NULL	0.93	NULL	NULL	NULL	1.57	1.72	5.19	118.9	19.61	<10.00	6.93
72	female	160cm	65Kg	77cm	96cm	0.80	157mmHg	57mmHg	4.13	4.05	123	30.4	92.1	137	11	21	46.6	5	1.25	0.92	1.11	5.63	5.1	107	5.5	459	79.26	NULL	1.01	NULL	NULL	NULL	0.524	1.85	5.19	87.5	15.5	12.89	15.71
63	male	165cm	71Kg	92cm	105cm	0.88	109mmHg	67mmHg	5.11	4.82	141	29.3	85.9	197	8	11	46	3.54	1.16	3.13	1.91	4.76	NULL	99	3.6	463	NULL	30.9	1.02	NULL	NULL	NULL	1.91	1.69	5.14	102.2	15.94	11.8	<5.00
60	male	175cm	93.6Kg	101cm	107cm	0.94	132mmHg	80mmHg	6.71	4.69	141	30.1	91.7	299	13	18	49	5.02	1.5	0.9	0.83	5.72	5.9	70	4.1	318	NULL	NULL	0.69	4.19	136.7	NULL	3.67	1.8	5.05	99.86	16.56	10.06	10.59
60	female	155cm	44.7Kg	66cm	85cm	0.78	95mmHg	50mmHg	7.76	5.16	159	30.8	91.1	257	21	20	51.8	6.32	2.9	3.63	1.17	5.03	5.7	82	3.1	466	95.68	NULL	0.92	NULL	NULL	NULL	2.71	1.81	4.94	97.55	15.66	<10.00	9.33
60	male	174.0cm	121.0Kg	121cm	119cm	1.02	153mmHg	97mmHg	6.3	5.28	165	31.3	89.6	204	47	30	48	4.13	1.1	2.77	1.36	5.3	5.5	93	3.8	494	91.3	9.9	0.9	4.22	139.5	NULL	1.06	1.75	5.72	112.9	17.92	10.4	<9.00
77	male	164cm	60Kg	86cm	91cm	0.95	152mmHg	78mmHg	5.9	4.69	144	30.7	94	175	9	14	51.9	3.99	1.74	3.05	3.44	4.73	4.6	108	3.9	416	66.68	NULL	1.15	NULL	NULL	NULL	5.67	1.78	5.17	91.6	15.2	<10.00	14.94
70	male	176.0cm	75.0Kg	95cm	95cm	1.00,`	170mmHg	82mmHg	5.32	4.31	133	30.9	92.8	130	8	15	45.3	3.75	1.32	4.59	1.39	7.71	NULL	113	5.2	420	NULL	13.7	1.07	NULL	NULL	NULL	2.44	1.71	5.19	90.22	16.75	12.4	12.73
66	male	167.0cm	75.0Kg	96cm	103cm	0.93	130mmHg	73mmHg	5.02	5.03	137	27.2	81.5	137	16	22	47.1	4.62	1.31	3.48	1.45	5.06	5.7	45	9	224	NULL	11.8	0.64	NULL	NULL	101.8	5.33	1.57	4.42	75.67	13.54	15.06	<9.00
64	male	160.0cm	50.0Kg	71cm	87cm	0.82	125mmHg	74mmHg	6.94	4.62	137	29.7	89.2	263	19	14	46.4	5	1.34	3.11	1.28	4.66	NULL	25	5	237	NULL	11.1	0.59	NULL	NULL	NULL	1.43	3.21	5.83	160.3	19.37	19.26	12.03
64	female	148cm	63Kg	97cm	104cm	0.93	135mmHg	93mmHg	4.54	5.22	160	30.7	88.7	276	20	21	50.8	4.36	1.21	2.46	2.52	5.39	NULL	78	5.3	290	94.58	13.3	0.92	4.14	142.4	NULL	1.31	1.78	4.98	92.5	15.94	13.1	8.9
63	female	154cm	49Kg	73cm	86cm	0.85	109mmHg	68mmHg	4.49	5.61	122	21.7	68.6	144	20	20	52.6	4.25	1.43	3.62	0.99	5.25	5.9	72	3.4	276	86.19	NULL	1	NULL	NULL	NULL	2.95	1.94	6.22	106.7	15.22	201.5	11.52
61	female	149.0cm	51.0Kg	72cm	89cm	0.81	112mmHg	68mmHg	5.75	5.24	155	29.6	91.2	166	43	24	47.2	3.85	1.05	2.93	1.11	4.65	5.5	102	3.9	445	69.47	NULL	1.15	NULL	NULL	NULL	4.97	2.02	5.19	107	15.5	19.16	13.19
62	male	168cm	63Kg	88cm	96cm	0.92	121mmHg	74mmHg	6.13	5.54	172	31	88.1	189	33	23	50	5.56	1.03	2.99	1.53	5.36	NULL	89	4.1	269	91.03	12.8	0.96	4.17	139.5	99.9	1.31	2.39	6.57	112	18.8	<10.00	10.9
66	female	162.0cm	83.0Kg	99cm	112cm	0.88	121mmHg	81mmHg	6.39	5.56	166	29.9	91.5	202	56	33	43.4	4.35	1.12	3.14	2.26	6.32	5.7	79	6.2	328	NULL	13.6	0.85	NULL	NULL	NULL	6.15	2.14	5.96	85.42	13.88	13.73	15.96
72	male	167cm	57.4Kg	76cm	84cm	0.90	119mmHg	58mmHg	5.71	4.74	141	29.7	91.1	202	17	18	46.7	4.89	1.69	3.51	1.16	5.37	NULL	68	5.1	202	NULL	NULL	0.84	NULL	NULL	NULL	2.24	1.74	4.41	112.6	15.26	11.83	12
62	male	170cm	72.2Kg	91cm	94cm	0.97	112mmHg	76mmHg	5.45	5.46	170	31.1	92.5	213	25	27	53.9	5.51	1.09	1.89	1.13	6.21	NULL	55	4.5	282	NULL	20.6	0.75	NULL	NULL	NULL	5.23	1.66	5.18	94.33	17.48	<10.00	12.94
63	female	159cm	57.6Kg	82cm	97cm	0.85	89mmHg	69mmHg	8.59	4.26	133	31.2	97.2	286	12	16	53.3	4.94	1.43	1.93	1.05	4.81	5.3	63	4	230	110.2	NULL	0.75	NULL	NULL	NULL	1.31	1.69	4.75	102.4	17.48	<10.00	16.9
65	female	169cm	102Kg	110cm	120cm	0.92	129mmHg	86mmHg	5.89	4.34	135	31.1	94	194	9	17	45.2	4.52	1.2	3.09	2.29	11.4	4.9	72	5.6	363	111.7	19.6	0.85	NULL	NULL	NULL	2.32	1.97	5.19	92.41	18.16	54.91	<9.00
65	male	168.0cm	74.0Kg	90cm	95cm	0.95	144mmHg	83mmHg	5.55	5.81	176	30.3	87.8	303	17	27	49.9	4.33	1.09	2.25	1.63	5.88	5.7	92	5.3	413	89.94	14.2	0.88	NULL	NULL	NULL	1.38	1.86	5.75	111	19	14.26	<9.00
64	male	157.0cm	60.0Kg	85cm	93cm	0.91	144mmHg	77mmHg	4.93	4.53	140	30.9	94	133	12	18	47.5	3.83	1.45	2.93	0.85	5.45	NULL	83	5.3	427	NULL	NULL	0.8	NULL	NULL	NULL	2.95	1.77	5.12	72.52	17.25	<10.00	9.53
66	male	167cm	76Kg	93cm	96cm	0.97	138mmHg	81mmHg	7.16	5.31	159	29.9	88.3	255	44	29	49.4	3.83	0.85	3.41	1.35	5.18	5.2	74	4.5	331	NULL	14.3	0.83	NULL	NULL	NULL	1.91	1.76	6.24	98.97	14.72	10.7	8.23
60	female	156.0cm	53.0Kg	74cm	88cm	0.84	159mmHg	79mmHg	5.33	4.4	130	29.5	90.7	109	23	26	48.4	8.96	1.35	3.15	2.14	4.52	NULL	82	5	467	NULL	12.4	0.8	NULL	NULL	NULL	2.17	1.47	4.67	76.13	16.9	13.58	268
63	female	162.0cm	73.0Kg	94cm	95cm	0.99	137mmHg	82mmHg	5.43	4.52	136	30.1	89.6	235	17	26	44.4	3.99	2.05	2.55	0.9	5.03	5.2	55	4.4	136	NULL	14.8	0.7	NULL	NULL	NULL	7.31	1.74	4.64	73.15	11.47	27.66	7.78
66	male	172cm	89Kg	105cm	105cm	1.00	132mmHg	86mmHg	4.51	5.12	101	19.7	65	240	7	9	46.5	3.65	1.15	3.06	2.19	5.34	NULL	73	4	260	NULL	12.7	0.8	NULL	NULL	106.2	2.68	1.29	3.88	103.7	16.01	<10.00	<9.00
60	female	163cm	60Kg	75cm	97cm	0.77	123mmHg	73mmHg	5.81	4.12	127	30.8	90.8	148	15	19	46.2	5.02	1.7	3.28	0.76	5.22	4.9	64	4.4	366	113.57	NULL	0.97	NULL	NULL	NULL	1.31	2.38	5.49	113.2	18.63	<10.00	12.87
71	male	161cm	73Kg	94cm	102cm	0.92	148mmHg	99mmHg	4.53	4.56	136	29.8	96.1	260	6	16	47.7	3.64	1.42	3.46	0.5	6.25	NULL	70	4.2	287	NULL	18.9	0.67	NULL	NULL	NULL	3.46	1.57	4.88	82.72	15.04	23.08	8.88
62	female	NULL	NULL	NULL	NULL	NULL	90mmHg	62mmHg	6.36	4.43	129	29.1	88.3	272	26	24	47.8	7.47	1.22	4.92	1.13	4.41	5.5	40	4.4	253	NULL	NULL	0.77	NULL	NULL	NULL	3.19	1.66	4.89	84.89	14.73	24.19	9.51
67	female	153cm	52.3Kg	84cm	92cm	0.91	110mmHg	67mmHg	4.91	4.69	139	29.6	93	239	11	18	50.8	5.47	1.79	2.4	0.7	4.74	5	60	3.8	342	120.34	10.9	0.78	NULL	NULL	NULL	4.15	1.54	4.64	85.4	14.2	<10.00	15.5
71	female	151.0cm	54.0Kg	80cm	91cm	0.88	136mmHg	71mmHg	5.26	5.04	163	32.3	93.3	199	23	23	49.5	4.1	1.33	3.09	1.01	4.95	NULL	96	3.9	279	NULL	15.7	0.81	NULL	NULL	NULL	4.61	1.66	5.03	81.3	15.9	256.1	15.19
69	male	177cm	81.7Kg	90cm	106cm	0.85	125mmHg	60mmHg	7.7	5.5	157	28.5	85.5	261	29	20	48.3	4.38	0.79	3.51	1.11	7.06	NULL	72	4.6	235	NULL	NULL	0.68	NULL	NULL	NULL	2.84	1.9	5.06	107.9	17.18	<10.00	21.43
61	female	159cm	53Kg	77cm	90cm	0.86	109mmHg	67mmHg	4.78	5.84	191	32.7	97.4	237	18	15	50.4	5.56	1.19	3.53	1.02	5.14	5.1	91	4.8	509	103.42	NULL	0.73	NULL	NULL	101.6	1.71	1.62	5.36	78.4	15.9	<10.00	12.22
60	female	157cm	54.8Kg	70cm	91cm	0.77	100mmHg	72mmHg	6.45	5.35	149	27.9	88.4	142	62	29	52.9	4.95	1.2	3.66	0.92	4.82	5.4	53	6.6	279	NULL	NULL	0.78	NULL	NULL	NULL	4.16	1.61	5.18	96.88	19.4	31.23	17.87
65	female	157.0cm	59.0Kg	80cm	96cm	0.83	135mmHg	87mmHg	4.6	4.67	146	31.3	97.4	193	21	24	50.2	5.59	2.21	3.54	1.84	5.08	6	68	5.6	350	NULL	14.5	1.02	NULL	NULL	NULL	12.74	2.17	5.18	115.9	15.89	13.7	<9.00
60	female	150.0cm	63.0Kg	81cm	97cm	0.84	161mmHg	94mmHg	7.64	6.01	171	28.5	86.5	417	61	34	52.1	5.88	1.03	3.42	2.14	5.53	NULL	88	4.3	375	87.85	14.3	0.93	3.83	143.5	NULL	2.59	2.33	5.44	132	19.2	187	<9.00
62	female	153cm	53.3Kg	72cm	98cm	0.73	110mmHg	73mmHg	5.57	4.18	120	28.7	90.9	107	20	28	49	4.9	1.24	2.99	1.05	5.55	6	76	5.2	282	NULL	NULL	0.82	NULL	NULL	NULL	2.85	1.74	5.25	107.7	18.23	<10.00	>600.00
65	male	167cm	78.5Kg	93cm	97cm	0.96	120mmHg	80mmHg	4.07	4.37	129	29.5	92.9	203	16	25	46	5.05	1.76	3.11	1.19	6.47	5.5	101	5.33	417	83.8	NULL	0.85	NULL	NULL	NULL	4.7	1.71	4.88	97.1	16.64	<10.00	35.37
70	male	165.0cm	56.0Kg	80cm	89cm	0.90	144mmHg	74mmHg	3.91	4.74	134	28.3	89.5	173	13	18	51.6	4.68	2.2	3.21	0.68	5.88	NULL	71	3.5	421	98.08	NULL	0.75	NULL	NULL	NULL	6.44	1.22	4.85	72.73	19.1	11.86	10.95
67	female	157.0cm	67.0Kg	90cm	99cm	0.91	150mmHg	91mmHg	9.27	4.67	141	30.2	88	363	49	34	46.7	3.51	0.89	3.07	1.93	5.52	5.4	62	5.4	305	98.31	13.9	0.77	NULL	NULL	NULL	8.57	1.39	4.06	94.6	14.4	18.8	18.65
62	female	148.0cm	53.0Kg	83cm	91cm	0.91	144mmHg	68mmHg	5.26	4.97	151	30.4	93	175	12	17	43.7	3.49	1.48	3	2.14	5.91	5.4	108	5	486	68.58	13.1	1.04	NULL	NULL	103.7	1.72	1.77	5.28	112	17.3	25.3	<9.00
62	male	169cm	78Kg	94cm	97cm	0.97	129mmHg	75mmHg	5.56	4.62	147	31.8	95	203	29	24	47.9	2.91	1.44	4.84	0.99	7.56	5.5	63	3.7	243	104.17	NULL	0.61	NULL	NULL	NULL	1.76	1.79	5.23	98.88	16.69	<10.00	12.22
62	male	165cm	68Kg	82cm	96cm	0.85	123mmHg	71mmHg	4.75	4.46	148	33.2	101.6	217	10	15	49.4	4.28	1.78	2.73	0.84	5.26	5.3	58	5.3	339	114.23	NULL	0.77	NULL	NULL	NULL	3.44	1.71	5.06	74.34	16.47	10.45	12.02
62	female	146.0cm	48.0Kg	74cm	81cm	0.91	148mmHg	74mmHg	5.39	3.92	131	33.4	100.8	174	17	17	43.5	4.03	1.11	4.18	0.86	6.68	5.4	71	5.6	238	105.96	NULL	0.72	NULL	NULL	103.7	2.68	1.91	4.76	93.43	14.95	35.85	16.4
60	male	172cm	59.1Kg	79cm	87cm	0.91	97mmHg	71mmHg	4.91	5.11	153	29.9	91.8	170	12	20	49.9	4.87	1.48	2.93	1.05	4.57	5.4	58	7.2	371	NULL	17.5	0.76	NULL	NULL	NULL	1.32	1.83	5.19	82.27	13.93	10.96	20.37
68	male	159cm	59Kg	87cm	87cm	1.00	118mmHg	81mmHg	4.52	4.52	142	31.4	94.9	215	25	22	48.6	5.86	1.44	4.2	1.13	5.64	4.9	58	4.4	346	NULL	NULL	0.82	NULL	NULL	NULL	4.45	1.62	4	106.2	16.17	27.33	20.78
63	male	164.0cm	60.0Kg	81cm	93cm	0.87	120mmHg	69mmHg	5.75	5.03	138	27.4	83.5	160	9	15	48.4	4.45	1.25	3.06	1.9	5.19	5.4	92	3.2	345	NULL	11.4	0.9	NULL	NULL	NULL	3.94	1.78	5.32	123.2	19.31	12.95	11.19
67	male	166cm	59Kg	79cm	95cm	0.83	113mmHg	66mmHg	6.14	4.88	147	30.1	91.8	184	15	15	43.1	3.22	0.88	4.48	1.84	4.62	5.2	62	5.6	336	109.24	12.7	0.76	NULL	NULL	106.9	2.2	1.72	4.31	116.5	18.25	10.8	<9.00
83	male	166.0cm	71.0Kg	90cm	96cm	0.94	123mmHg	64mmHg	6.48	5	157	31.4	98.6	102	22	23	45.6	4.58	1.35	2.61	1.5	5.41	NULL	66	5.5	235	91.15	13.6	0.89	NULL	NULL	104.4	4.46	2.13	5.97	106.9	15.19	<10.00	<9.00
63	male	168.0cm	71.0Kg	89cm	96cm	0.93	123mmHg	71mmHg	8.92	5.4	175	32.4	95.7	277	40	29	45.7	5.84	0.89	2.4	1.4	6.09	6.1	80	3.7	380	NULL	15.9	0.74	NULL	NULL	NULL	10.33	2.01	4.95	81.72	13.1	17.85	19.5
61	male	171cm	67Kg	91cm	101cm	0.90	142mmHg	82mmHg	8.44	5.24	162	30.9	91.6	171	59	34	44	5.35	0.87	2.99	3.12	5.71	NULL	82	6.1	359	97.72	NULL	1.03	NULL	NULL	NULL	3.16	1.66	5.43	64.8	13.7	11	9.25
64	female	156.0cm	53.0Kg	78cm	94cm	0.83	112mmHg	65mmHg	4.29	6.84	128	18.7	58.6	51	5	16	50.1	2.75	1	2.55	1.69	5.47	5.1	77	6.6	421	118.22	10	0.85	NULL	NULL	NULL	2.04	1.86	5.6	88.2	16.1	10.1	7.86
85	female	141cm	49Kg	81cm	92cm	0.88	133mmHg	60mmHg	4.76	4.81	148	30.8	94.2	158	15	21	49.8	4.63	1.79	1.78	0.55	4.89	5.5	75	5.4	379	NULL	18	0.81	NULL	NULL	NULL	1.56	1.2	3.66	75.4	15.6	10.03	12.54
60	female	152.0cm	46.0Kg	70cm	88cm	0.80	132mmHg	80mmHg	7.71	4.64	139	30	88.8	282	38	31	48.9	4.74	1.68	3.04	0.65	4	4.9	60	5.3	213	104.56	NULL	0.64	NULL	NULL	NULL	0.769	1.81	4.75	114	16.7	<10.00	<9.00
76	male	171cm	79Kg	94cm	100cm	0.94	165mmHg	74mmHg	5.15	5.56	174	31.3	91.4	270	32	25	48	4.62	0.74	3.4	1.13	5.23	5.2	54	4.9	291	NULL	17.4	0.69	NULL	NULL	NULL	0.754	2.06	5.5	125.6	19.28	<10.00	18.03
64	male	166.0cm	62.0Kg	89cm	90cm	0.99	140mmHg	87mmHg	6.37	4.57	140	30.6	96.3	340	32	20	46.8	3.99	1.22	2.9	2.23	4.68	5.4	78	3.4	357	104.36	17.2	0.76	4.37	143.1	NULL	3.81	2.01	5.31	98.41	16.56	<10.00	<9.00
71	male	164cm	74Kg	93cm	93cm	1.00	124mmHg	56mmHg	5.28	4.62	136	29.4	91.1	193	14	19	47.4	4.65	0.94	3.31	0.88	6.44	5.8	94	2.7	386	NULL	14.6	0.96	NULL	NULL	NULL	1.82	1.78	4.4	101.9	16.16	271.6	6.18
61	male	169.0cm	70.0Kg	88cm	95cm	0.93	135mmHg	73mmHg	5.24	4.64	144	31	96.1	159	18	23	46	6.25	2.4	1.43	1.1	11.27	5.3	43	6.5	155	NULL	NULL	0.57	NULL	NULL	NULL	1.21	2.37	5.76	113.3	17.94	10.38	8.58
69	female	153cm	58Kg	80cm	94cm	0.85	134mmHg	74mmHg	4.97	4.76	145	30.5	94.1	184	24	27	48.7	5.94	1.84	4.35	0.94	4.96	NULL	79	3.5	356	NULL	NULL	0.95	NULL	NULL	NULL	3.6	2.05	5.44	92.12	16.62	<10.00	28.93
66	male	169cm	70Kg	92cm	101cm	0.91	131mmHg	81mmHg	4.93	3.93	128	32.6	100	235	9	19	46.4	3.56	1.6	3.1	0.53	5.09	5.1	66	4.3	378	NULL	22.2	0.82	NULL	NULL	NULL	1.44	1.34	3.96	96.08	17.59	11.64	<9.00
66	male	163.0cm	53.0Kg	82cm	90cm	0.91	109mmHg	57mmHg	4.25	4.5	140	31.1	91.8	168	13	19	48.5	6.15	1.92	1.58	1.54	5.26	5.1	70	4.1	403	NULL	13.9	0.83	NULL	NULL	102.3	3.15	1.87	5.05	114.7	19.11	27.13	<9.00
61	female	160cm	65Kg	86cm	99cm	0.87	156mmHg	91mmHg	6.06	4.68	137	29.3	91.7	221	19	19	45.2	4.81	1.25	4.65	0.54	6.83	NULL	46	2.9	315	NULL	10.3	0.68	NULL	NULL	NULL	1.4	1.97	5.11	98.49	16.09	<10.00	8.84
61	female	154cm	60.3Kg	85cm	94cm	0.90	155mmHg	72mmHg	7.8	5.31	163	30.7	90.6	262	127	60	49.8	7.83	0.91	2.69	0.76	5.86	5.6	73	4.4	348	107.24	14.4	0.69	NULL	NULL	NULL	1.95	2.3	6.13	121.6	19.62	10.34	11.7
64	male	161.0cm	70.0Kg	90cm	97cm	0.93	138mmHg	87mmHg	7.13	4.54	138	30.4	91.6	319	5	11	47.7	3.02	1.21	3.31	1.68	5.18	5.2	60	2.9	287	113.76	15.5	0.68	4.86	139.6	NULL	3.38	1.88	5.31	112	15.8	11.6	7.63
63	male	167.0cm	61.0Kg	82cm	93cm	0.88	105mmHg	63mmHg	4.68	4.46	126	28.3	87.2	257	18	17	43.1	4.52	2.16	3.36	1.33	5.06	5.2	43	4	236	134.28	NULL	0.57	NULL	NULL	NULL	2.2	1.62	5.16	101.7	17.5	12	<9.00
62	male	165cm	61Kg	81cm	91cm	0.89	104mmHg	66mmHg	6.42	5.51	162	29.4	91.1	181	78	40	51.2	4.75	1.18	3.31	0.53	5.02	5.4	60	4.6	283	NULL	NULL	0.69	NULL	NULL	NULL	2.55	1.61	4.7	86.48	15.63	22.02	11.68
66	male	159.0cm	57.0Kg	86cm	84cm	1.02	166mmHg	78mmHg	8.53	4.92	158	32.1	98.6	132	27	27	50.8	3.92	1.19	3.41	1.07	5.25	5.7	82	5.2	288	88.57	19.8	0.78	NULL	NULL	NULL	1.36	1.37	4.56	80.82	17.01	<10.00	9.17
79	female	152.0cm	66.0Kg	93cm	101cm	0.92	165mmHg	77mmHg	4.96	4.42	142	32.1	93.7	125	141	80	45.1	5.78	0.74	5.96	2.05	5.35	5.6	63	5.5	333	93.76	18.4	0.79	NULL	NULL	104.1	3.4	1.87	5.18	103.2	15.6	11.9	14.3
63	male	169cm	71Kg	91cm	99cm	0.92	135mmHg	82mmHg	4.31	4.74	144	30.4	92.6	260	30	26	51.1	6.84	1.88	3.64	0.86	6.05	NULL	53	3.6	314	NULL	12.3	0.85	NULL	NULL	NULL	4.9	1.49	4.37	92.83	16.99	<10.00	10.64
60	female	155cm	53Kg	67cm	85cm	0.79	132mmHg	66mmHg	5.13	3.8	120	31.6	99.2	318	14	11	48.4	4.86	2.09	3.91	0.75	4.84	5.5	70	5.1	189	NULL	NULL	0.6	NULL	NULL	NULL	3.62	1.63	4.81	108.8	16.98	<10.00	9.14
61	female	149cm	56Kg	80cm	92cm	0.87	141mmHg	74mmHg	6.26	5.44	165	30.3	89.5	271	49	29	48	5.74	1.02	1.51	0.77	4.63	NULL	70	4.1	222	NULL	NULL	0.72	NULL	NULL	NULL	4.04	1.36	4.92	82.52	18.2	10.79	11.04
64	female	158.0cm	66.0Kg	84cm	101cm	0.83	132mmHg	82mmHg	5.68	5.14	146	28.4	88.1	165	25	27	49.2	3.25	1.17	4.24	1.07	5.67	5.6	77	5.2	292	92.45	NULL	0.98	NULL	NULL	NULL	1.49	2.31	6.08	103.6	16.36	<10.00	7.09
71	female	154cm	50Kg	83cm	90cm	0.92	118mmHg	68mmHg	5.6	6.48	140	21.6	66.2	295	30	23	45.9	4.81	1.07	3.15	1.97	5.03	6.3	76	4.3	343	NULL	8.9	0.87	NULL	NULL	NULL	1.62	2.03	5.95	99.85	18.58	13.3	13.55
74	male	156cm	47Kg	73cm	85cm	0.86	142mmHg	87mmHg	5.08	4.67	134	28.7	88	224	20	23	47.3	5.66	1.7	4.36	0.67	4.76	5.4	56	5.2	294	119.69	13.1	0.65	NULL	NULL	NULL	2.66	2.1	5.5	90.2	16.5	<10.00	116.1
61	male	163.0cm	55.0Kg	79cm	87cm	0.91	130mmHg	89mmHg	6	5.74	171	29.8	91.8	228	57	35	49.5	4.93	1.15	3.15	2.01	5.36	5.6	47	4.7	226	107.88	16	0.75	NULL	NULL	NULL	1.75	2.25	4.68	97.47	16.15	17.5	14.45
63	male	167.0cm	67.0Kg	93cm	106cm	0.88	137mmHg	72mmHg	5.29	4.45	147	33	98.9	135	9	16	48.2	3.6	1.78	2.5	4.69	6.65	6	75	5.5	277	97.48	17.7	0.73	NULL	NULL	NULL	2.16	2.25	6.51	111.6	17.33	18.72	12.91
65	female	155cm	63Kg	87cm	101cm	0.86	153mmHg	79mmHg	5.16	4.62	151	32.7	98.3	155	14	14	48.4	3.31	0.91	3.82	0.85	5.78	5.5	65	3.8	268	NULL	14.1	0.76	NULL	NULL	103.2	3.57	1.61	4.76	98.27	15.46	<10.00	<9.00
66	female	144cm	41Kg	68cm	83cm	0.82	137mmHg	70mmHg	6.74	4.78	148	31	91.6	212	19	19	50	4.23	1.84	3.86	0.45	4.41	NULL	63	6.2	283	113.34	NULL	0.68	NULL	NULL	NULL	3.87	2.2	4.68	146.2	20.39	18.69	9.67
62	female	158cm	50Kg	69cm	89cm	0.78	110mmHg	52mmHg	5.24	6.2	179	28.9	86.5	153	26	18	46.2	3.96	1.08	4.81	1.06	5.29	5.3	100	5.7	386	75.8	NULL	1.03	NULL	NULL	105.3	2.45	1.08	3.96	54.8	15.3	11.86	10.72
64	male	164.0cm	75.0Kg	92cm	99cm	0.93	118mmHg	60mmHg	6.06	4.58	141	30.8	96.7	212	18	18	45.9	4.43	1.75	2.34	0.93	4.75	5.7	68	3.7	305	118.45	NULL	0.9	NULL	NULL	NULL	1.7	2.2	5.85	122.7	20.6	15.57	14.31
60	female	163cm	51.1Kg	68cm	88cm	0.77	90mmHg	60mmHg	3.74	5.26	164	31.2	92	139	26	23	47	4.41	1.22	2.86	1.11	4.87	6.6	78	4.9	240	79.35	14.8	1.23	NULL	NULL	NULL	2.14	1.28	3.74	91.6	15.5	10.48	10.19
63	male	167.0cm	63.0Kg	81cm	93cm	0.87	122mmHg	72mmHg	5.57	4.39	128	29.2	91.6	317	13	17	49.1	5.23	1.52	2.64	0.76	6.1	5.3	64	3.5	185	NULL	NULL	0.7	4.23	145.3	NULL	1.14	1.02	3.86	90.98	23.74	12.85	8.38
60	female	153cm	50Kg	74cm	87cm	0.85	108mmHg	60mmHg	7.17	5.58	166	29.7	88.9	155	14	18	48.5	6.72	1.5	3.09	0.63	4.77	5.1	65	3.6	272	NULL	NULL	0.79	NULL	NULL	NULL	2.75	1.83	5.09	102	15.23	<10.00	<5.00
62	female	154.0cm	55.0Kg	83cm	93cm	0.89	117mmHg	67mmHg	5.3	3.52	107	30.4	99.7	325	34	28	41	3.72	1.41	2.52	0.85	4.88	NULL	79	3.4	374	NULL	NULL	0.81	NULL	NULL	105.9	2.47	2.32	6.2	105	17.1	<10.00	<9.00
62	male	160cm	65Kg	91cm	97cm	0.94	137mmHg	74mmHg	6.66	5.89	178	30.2	88.6	231	23	13	49.3	4.6	1.67	2.19	1.3	6.11	5.5	81	3.7	376	NULL	10.6	0.74	NULL	NULL	NULL	2.79	1.7	5.86	89.26	17.12	180	7.57
66	female	145.0cm	45.0Kg	73cm	90cm	0.81	147mmHg	73mmHg	6.44	4.78	138	28.9	92.7	300	20	14	48.7	3.36	1.09	3.99	1.72	4.91	9.9	61	3.4	197	111.47	NULL	0.82	NULL	NULL	NULL	3.58	1.55	4.89	100.3	18.4	27.3	<9.00
61	male	160cm	72.3Kg	94cm	96cm	0.98	143mmHg	86mmHg	5.28	5.05	150	29.7	88.7	86	60	41	51.4	3.59	1.35	3.99	1.1	5.31	5.5	68	6.5	316	NULL	NULL	0.83	NULL	NULL	NULL	2.51	1.39	4.43	83.24	15.71	<10.00	16.54
86	female	140.0cm	32.0Kg	64cm	75cm	0.85	144mmHg	61mmHg	3.49	4.39	150	34.2	102.7	142	15	15	42.6	3.57	1.36	2.08	3.83	5.36	5.7	80	5.5	272	108.01	NULL	0.9	NULL	NULL	NULL	1.71	2.19	6.72	114.1	20.68	47.6	14.12
60	female	158cm	59.8Kg	87cm	88cm	0.99	127mmHg	74mmHg	11.03	6.06	167	27.6	87.6	265	109	58	52.7	6.41	1.38	3.14	0.95	5.43	NULL	50	5.4	242	NULL	NULL	0.55	NULL	NULL	NULL	2.35	2.36	5.34	116.8	20.73	147.9	6.42
66	female	156cm	52.4Kg	76cm	92cm	0.83	140mmHg	81mmHg	6.9	5.63	165	29.3	89.2	204	23	23	51.9	6.65	1.32	3.18	1.18	5.18	5	77	4.3	336	121.59	NULL	0.92	NULL	NULL	NULL	1.27	1.76	5.26	93.23	18.16	314.3	8.25
64	female	154cm	59.9Kg	88cm	103cm	0.85	92mmHg	52mmHg	3.54	4.61	146	31.7	92.6	151	8	13	49.6	3.96	1.11	2.77	1.13	5.09	NULL	78	4.4	383	NULL	NULL	0.87	NULL	NULL	NULL	1.66	1.79	5.5	98.03	17	<10.00	15.48
60	female	145cm	51Kg	78cm	90cm	0.87	135mmHg	60mmHg	5.6	4.86	110	22.6	74.7	260	8	14	46.9	4.61	1.65	1.94	0.94	5.28	NULL	62	3.4	384	118.84	NULL	0.6	NULL	NULL	NULL	3.55	1.73	4.57	85.43	13.74	<10.00	<9.00
64	female	157cm	47Kg	70cm	82cm	0.85	133mmHg	63mmHg	4.93	5.28	154	29.2	88.6	171	15	16	49	3.9	1.32	3.12	0.72	5.02	5.5	83	4.2	507	NULL	NULL	0.77	NULL	NULL	NULL	2.06	1.42	4.85	91.78	21.92	18.74	7.29
61	male	173.0cm	73.7Kg	90cm	101cm	0.89	119mmHg	65mmHg	7.04	4.33	142	32.8	96.3	297	15	21	45.6	4.42	1.62	3.12	1.05	5.99	NULL	97	4.6	449	NULL	NULL	0.99	NULL	NULL	NULL	4.29	1.76	5.45	108.1	18.74	56.76	<5.00
64	female	159cm	49Kg	66cm	87cm	0.76	132mmHg	70mmHg	5.22	5.44	173	31.8	97.2	267	91	56	49.8	6.47	1.26	4.03	0.65	4.94	NULL	61	7.3	233	NULL	NULL	0.73	NULL	NULL	NULL	2.64	2	4.75	122.9	19.42	11.78	127.6
75	female	161cm	65Kg	81cm	95cm	0.85	129mmHg	61mmHg	5.22	4.51	131	29	92.2	178	12	16	43.3	5.6	1.29	4.45	1.13	5.09	5.4	38	3.5	291	NULL	14.2	0.64	NULL	NULL	NULL	3.02	1.51	5.23	108.2	19.01	<10.00	62.26
60	female	152cm	54Kg	77cm	87cm	0.89	122mmHg	78mmHg	5.92	4.61	139	30.2	92.8	249	5	15	50.7	4.38	1.85	2.83	2.55	4.8	5.4	73	4	382	NULL	11.2	0.91	NULL	NULL	NULL	0.919	2.02	5.21	105.1	15.94	<10.00	<9.00
74	female	149cm	53Kg	85cm	85cm	1.00	155mmHg	71mmHg	5.68	4.34	137	31.6	94.5	276	16	14	50.1	5.2	1.61	3.59	0.77	6.32	5.3	50	3.6	357	NULL	11.9	0.64	NULL	NULL	NULL	2.94	1.74	4.64	109.1	18.34	1365	11.8
80	female	147cm	48.4Kg	78cm	81cm	0.96	124mmHg	63mmHg	7.01	4.7	143	30.4	87	322	59	27	46.6	5.29	1.2	2.48	0.65	8.16	5	56	2.4	276	118.02	NULL	0.78	NULL	NULL	NULL	1.72	1.23	4.33	89.79	17.48	10.06	13.57
64	female	147cm	48Kg	76cm	88cm	0.86	138mmHg	79mmHg	7.43	6.84	138	20.2	65.4	253	16	28	48.2	2.36	1.11	5.11	1.01	7.13	5.4	83	5.4	240	NULL	NULL	0.91	NULL	NULL	NULL	2.61	1.96	5.65	87.33	16.05	<10.00	10.33
63	female	150.0cm	52.0Kg	70cm	89cm	0.79	139mmHg	70mmHg	3.48	4.78	151	31.6	96.7	207	27	28	50.5	5.6	1.38	4.3	0.38	5.62	NULL	52	5.9	250	NULL	NULL	0.65	NULL	NULL	NULL	2.36	1.76	4.57	102.5	17.99	13.7	6.02
62	female	144cm	48.5Kg	78cm	84cm	0.93	120mmHg	83mmHg	7.55	5.13	151	29.4	89.7	216	15	16	47.6	4.48	2.1	3.79	0.84	4.94	5.4	66	2.4	341	NULL	NULL	0.74	NULL	NULL	NULL	4.77	1.7	5.85	74.66	18.09	<10.00	13.32
84	female	155cm	57Kg	84cm	88cm	0.95	112mmHg	55mmHg	3.53	4.75	143	30.1	92.8	233	22	22	46.9	5.05	1.38	1.99	1.11	8.59	6	89	3.9	467	79.1	14.6	0.99	NULL	NULL	NULL	2.18	1.84	5.23	95.6	14.7	13.91	12.77
61	female	146.0cm	68.0Kg	92cm	102cm	0.90	133mmHg	78mmHg	9.79	4.65	143	30.8	92.5	449	15	19	47	4.22	1.43	2.46	0.84	5.23	NULL	72	3.4	259	NULL	13.6	0.81	NULL	NULL	NULL	2.34	2.37	4.55	125	15.16	46.98	16.32
72	female	161.0cm	76.0Kg	90cm	110cm	0.82	207mmHg	87mmHg	7.28	4.42	123	27.8	86.9	207	7	13	47.1	2.7	0.97	3.15	2.18	7.17	5.9	91	4	347	82.02	14.3	0.9	NULL	NULL	NULL	1.72	1.77	5.52	93.74	16.76	11.4	<9.00
73	female	155cm	53Kg	77cm	92cm	0.84	163mmHg	93mmHg	5.67	5.1	157	30.8	89.6	227	18	23	49.5	6.27	1.3	2.33	0.5	5.66	NULL	53	4.5	218	NULL	NULL	0.66	NULL	NULL	NULL	1.7	1.45	4.71	112.2	20.88	11.53	16.69
64	female	158cm	59.7Kg	86cm	93cm	0.92	125mmHg	73mmHg	6.3	5.42	164	30.3	93.5	213	53	31	49.6	4.9	1.67	3.27	0.85	4.75	NULL	70	4.6	290	NULL	NULL	0.78	NULL	NULL	NULL	2.59	1.78	5	103	16.54	<10.00	11.46
68	male	183cm	81Kg	89cm	96cm	0.93	115mmHg	60mmHg	5.83	4.53	127	28	88.1	269	15	20	48.4	5.52	1.83	2.85	1.09	7.57	NULL	107	6.4	403	78.16	14.4	0.87	NULL	NULL	NULL	5.32	1.75	4.84	106.4	17.49	21.85	23.91
61	male	166.0cm	61.0Kg	82cm	94cm	0.87	96mmHg	64mmHg	4.96	5.39	165	30.6	91.3	185	65	37	48.4	6.83	0.99	4.14	1.88	3.82	5.3	79	7.9	213	78.68	16.8	0.84	4.25	138.7	NULL	8.58	1.63	4.51	91.71	13.64	12.3	7.86
70	male	184cm	77Kg	88cm	96cm	0.92	160mmHg	95mmHg	5.74	4.39	134	30.5	91.6	237	17	16	46.8	3.92	1.38	2.81	2.26	5.01	6.3	65	4.1	361	91.56	15	0.91	NULL	NULL	NULL	7.71	2.06	5.36	95.05	17.03	<10.00	<9.00
64	female	156cm	51Kg	79cm	87cm	0.91	119mmHg	73mmHg	6.72	4.78	146	30.5	90.2	232	21	20	49.4	4.89	1.7	3.77	1.05	4.87	5.4	54	5.4	243	NULL	NULL	0.58	NULL	NULL	NULL	3.98	2.04	4.87	96.71	15.6	<10.00	13.87
65	female	149.0cm	48.0Kg	70cm	90cm	0.78	150mmHg	86mmHg	4.95	4.35	125	28.7	89.2	275	10	16	45.7	8.05	1.43	3.81	1.69	4.28	5.4	92	3.4	431	94.47	12.4	0.7	NULL	NULL	NULL	1.27	1.56	4.53	98	18.35	448	127.6
63	female	156cm	59Kg	76cm	101cm	0.75	124mmHg	69mmHg	6.09	5.32	170	32	94	187	70	29	49.5	5.59	0.96	4.73	1.13	4.98	5.1	82	6.6	319	NULL	10.4	0.93	NULL	NULL	NULL	1.43	1.7	5.48	87.94	17.53	13.27	7.84
60	female	150cm	45.5Kg	70cm	84cm	0.83	99mmHg	52mmHg	7.84	4.06	126	31	96.6	166	10	17	45.2	6.38	2.27	3.39	1.05	4.72	NULL	55	7.2	225	NULL	NULL	0.84	NULL	NULL	NULL	11.97	2.13	5.38	108	15.94	11.25	12.06
70	male	166cm	61Kg	85cm	95cm	0.89	140mmHg	68mmHg	6.75	4.16	133	32	96.9	224	11	16	48.2	4.62	1.62	3.36	0.89	5.25	5.5	93	5.3	472	95.91	14	0.84	NULL	NULL	NULL	4.04	1.84	5.44	110.6	18.03	<10.00	91.04
63	male	166cm	65.4Kg	85cm	95cm	0.89	142mmHg	69mmHg	6.21	4.54	144	31.7	95.8	294	10	16	50.2	2.95	1.07	3.03	0.88	5.23	5.5	91	4.4	439	85.55	NULL	0.83	NULL	NULL	NULL	1.51	1.75	5.57	82.9	16	62.04	<9.00
64	female	160.0cm	57.0Kg	83cm	100cm	0.83	123mmHg	67mmHg	7.8	3.98	133	33.4	103.8	180	12	18	46.8	4.9	1.47	2.56	0.6	5.7	NULL	39	8.5	255	NULL	NULL	0.49	NULL	NULL	NULL	2.24	2.27	6.04	110.7	17.2	<10.00	127.6
72	female	151cm	50Kg	76cm	94cm	0.81	136mmHg	73mmHg	4.08	5.63	173	30.7	92.5	227	25	24	48.9	5.55	0.96	3.14	1.26	4.67	NULL	68	4.4	285	NULL	12.2	0.92	3.82	143.4	NULL	1.46	2.09	6.08	98.16	18.21	14.8	10.85
69	female	148cm	56.6Kg	86cm	88cm	0.98	149mmHg	81mmHg	6.88	5.35	158	29.5	90.7	372	53	79	54.8	3.66	1.29	2.85	0.7	10.15	5.8	82	4.4	359	NULL	NULL	0.99	NULL	NULL	NULL	2.27	1.47	4.42	99.14	13.15	<10.00	13.42
73	female	160cm	67Kg	87cm	100cm	0.87	136mmHg	75mmHg	4.84	4.28	141	32.9	95.8	294	26	30	52.4	6.76	2.39	2.79	0.68	10.96	NULL	66	3.7	436	NULL	NULL	1.06	NULL	NULL	NULL	1.31	1.63	4.88	103.3	17.76	<10.00	18.48
60	female	158cm	57Kg	70cm	88cm	0.80	117mmHg	72mmHg	5.17	6.48	138	21.3	70.7	170	21	30	47.3	4.32	1.78	2.17	0.72	4.92	5.1	79	7.3	358	109.04	NULL	0.75	NULL	NULL	NULL	1.63	1.88	5.79	106	17.7	49.86	5.74
60	male	163cm	60Kg	82cm	92cm	0.89	125mmHg	77mmHg	2.58	4.54	135	29.7	92.7	210	25	38	48.4	4.65	2.19	3.31	1.46	5.41	5.2	103	4.6	621	85.96	12.4	0.95	4.91	140.8	NULL	4.11	1.28	5.35	50.5	17.64	10.6	<9.00
65	female	144.0cm	52.0Kg	82cm	93cm	0.88	135mmHg	59mmHg	5.8	4.97	155	31.2	96.2	174	22	25	46.9	5.11	1.12	1.59	2.08	5.58	5.8	101	5.3	422	NULL	16.2	1.02	NULL	NULL	NULL	2.51	1.8	4.74	102.8	15.89	13	<9.00
64	female	157cm	50.3Kg	70cm	81cm	0.86	94mmHg	55mmHg	7.59	4.43	136	30.7	94.4	134	NULL	NULL	NULL	NULL	NULL	3.43	0.87	4.27	4.9	58	NULL	213	119.15	NULL	0.57	NULL	NULL	NULL	1.66	1.54	4.57	107.3	17.29	<10.00	13.27
61	female	161cm	57.5Kg	80cm	90cm	0.89	134mmHg	67mmHg	6.83	4.63	138	29.8	91.6	307	10	16	48.6	5.41	1.78	3.74	1.1	5.12	13.3	59	3.3	218	NULL	NULL	0.64	4.53	143.2	NULL	7.6	1.52	4.76	102.3	21.57	<10.00	14.67
60	female	153cm	50.9Kg	75cm	87cm	0.86	120mmHg	68mmHg	4.32	4.63	139	30	95.9	130	26	24	43.7	4.52	1.26	3.1	0.61	5.36	5.5	55	4.9	230	114.62	10.4	0.68	NULL	NULL	NULL	3.78	1.92	4.84	88.45	16.05	173.8	28.65
60	female	157cm	51Kg	72cm	85cm	0.85	103mmHg	64mmHg	4.91	4.59	137	29.8	91.1	209	19	19	46.7	5.16	2.07	2.77	1.13	5.59	5.9	64	5.2	340	NULL	10.2	0.73	NULL	NULL	NULL	1.78	1.56	4.39	100.4	16.14	13.79	14.06
60	male	168cm	72Kg	91cm	99cm	0.92	116mmHg	70mmHg	4.61	5.78	116	20.1	64	110	10	16	46.3	2.78	1.07	4.29	1.35	5.77	NULL	90	3.3	317	95.67	NULL	0.88	NULL	NULL	NULL	2.02	1.72	5.43	72.71	15.02	10.2	<9.00
65	male	165.0cm	56.0Kg	74cm	89cm	0.83	103mmHg	57mmHg	5.59	4.95	146	29.5	91.7	232	26	26	48.1	5.04	0.92	2.84	2.78	4.91	NULL	96	3.7	374	NULL	12.6	0.94	NULL	NULL	NULL	4.33	1.74	5.58	87.51	16.1	<10.00	<9.00
63	female	153.0cm	53.0Kg	81cm	95cm	0.85	109mmHg	67mmHg	7.49	5.33	155	29.1	93.1	252	25	31	50.9	5.04	1.1	3.57	1.8	4.98	5.7	85	3.6	343	96.23	8.7	0.73	NULL	NULL	NULL	1.62	1.51	5.1	72.22	14.6	15.7	<9.00
67	male	173cm	73Kg	89cm	95cm	0.94	134mmHg	80mmHg	6.19	4.71	133	28.2	85.6	248	19	19	45.8	4.39	0.93	3.6	1.6	6.64	5.3	60	3.7	267	NULL	13	0.77	NULL	NULL	NULL	2.96	1.4	4.73	87.94	15.43	<10.00	<9.00
63	male	174cm	75Kg	90cm	97cm	0.93	133mmHg	83mmHg	6.17	4.16	133	32	99.5	156	14	20	50.8	5.01	1.42	1.6	1.27	5.18	5.4	65	2.8	228	96.17	13.6	0.78	NULL	NULL	NULL	2.14	1.85	4.75	127.6	16.68	10.9	10.48
77	female	153cm	47.6Kg	76cm	88cm	0.86	110mmHg	61mmHg	4.9	5.04	161	31.9	93.3	210	27	20	57.8	5.13	1.45	3.69	1.01	11.94	NULL	59	3.2	241	103.68	NULL	0.78	NULL	NULL	NULL	1.52	1.6	4.37	115.6	17.83	<10.00	14.63
63	female	162cm	63Kg	82cm	95cm	0.86	180mmHg	101mmHg	7.44	5.22	172	33	102.3	198	20	18	48.9	5.96	1.2	3.29	0.97	6.62	5.5	53	4.1	371	NULL	NULL	0.97	NULL	NULL	NULL	5.6	1.69	4.63	97.81	14.96	<10.00	16.47
61	female	158.0cm	55.0Kg	77cm	90cm	0.86	112mmHg	66mmHg	9.69	6.83	142	20.8	66.3	255	110	41	50	3.54	1.21	3.21	0.86	5.13	5.5	61	5.9	233	107.72	NULL	0.75	NULL	NULL	NULL	1.44	1.58	4.26	101	14.9	467.5	8.61
66	female	152cm	68.1Kg	92cm	97cm	0.95	129mmHg	85mmHg	5.94	5	151	30.2	90.2	270	29	24	49.7	5.43	0.96	3.29	1.13	5.25	5.8	77	5.7	333	NULL	NULL	0.86	NULL	NULL	NULL	1.03	2.36	5.65	145.6	22.5	<10.00	6.51
60	female	161cm	51Kg	67cm	88cm	0.76	110mmHg	65mmHg	6.18	5.14	158	30.7	92.8	193	22	24	51.6	3.91	1.4	5.25	0.81	5.48	NULL	75	5.1	283	NULL	NULL	0.6	NULL	NULL	NULL	2.88	1.93	5.56	121.4	21.04	23.47	7.14
70	male	171.0cm	78.0Kg	98cm	99cm	0.99	151mmHg	68mmHg	2.91	4.72	134	28.4	90.7	208	17	24	51.4	4.83	2	0.99	1.3	5.08	NULL	52	2.3	194	NULL	NULL	0.69	NULL	NULL	NULL	1.09	1.61	4.63	113.3	19.73	17.69	7.15
64	male	159.0cm	69.0Kg	89cm	90cm	0.99	138mmHg	67mmHg	4.09	4.86	147	30.2	93.6	156	8	13	50	3.11	1.27	3.03	0.72	5.05	NULL	46	3.9	245	NULL	NULL	0.65	NULL	NULL	NULL	4.13	1.58	4.35	115.7	20.81	57.03	>600.00
66	male	166.0cm	63.0Kg	83cm	94cm	0.88	123mmHg	82mmHg	7.13	5.03	154	30.6	94.4	108	21	23	47.4	7.33	0.79	4.16	2.07	5.3	6.1	76	7.3	316	NULL	12	0.69	NULL	NULL	NULL	2.69	1.66	5.32	86.21	14.9	84.2	15.58
64	male	179cm	71.5Kg	83cm	97cm	0.86	121mmHg	87mmHg	4.82	4.27	123	28.8	90.2	235	21	19	42.7	6	2.08	4.91	1.05	5.56	5.1	66	4	242	NULL	NULL	0.72	NULL	NULL	NULL	1.3	1.48	4.95	97.65	16.93	<10.00	359.8
76	female	154cm	67Kg	93cm	101cm	0.92	114mmHg	65mmHg	4.88	5.77	127	22	75	101	28	23	46.8	4.36	1.07	4.31	0.52	4.78	5.2	66	6.2	284	108.65	10.1	0.65	NULL	NULL	NULL	0.715	1.37	3.52	111	18.1	<10.00	10.53
69	male	169cm	52Kg	64cm	82cm	0.78	136mmHg	73mmHg	7.33	5.63	166	29.5	93.1	303	32	25	49.5	5.84	1.58	2.99	0.9	6.6	7.2	67	5.5	269	NULL	14.4	0.72	NULL	NULL	NULL	1.56	1.65	5.3	99.35	20.9	<10.00	136.2
60	female	157cm	50Kg	63cm	89cm	0.71	140mmHg	75mmHg	6.17	5.69	170	29.9	91.7	264	15	17	48.4	5.6	2.27	2.05	1.22	4.7	NULL	65	4.3	404	79.56	13.8	0.86	NULL	NULL	NULL	1.94	1.45	4.77	85.21	15.43	50.36	5.97
61	male	170cm	62Kg	78cm	95cm	0.82	134mmHg	70mmHg	NULL	NULL	NULL	NULL	NULL	NULL	NULL	NULL	NULL	NULL	NULL	2.68	1.11	5.01	NULL	65	NULL	250	NULL	NULL	0.66	NULL	NULL	NULL	3.93	1.46	4.57	74.55	14.61	13	17.12
60	female	164.0cm	57.0Kg	78cm	89cm	0.88	123mmHg	75mmHg	6.99	4.81	156	32.4	94.4	249	20	24	46.5	5.03	1.09	4.09	1.93	5.03	5.6	88	5.1	513	NULL	10.5	1.06	NULL	NULL	NULL	1.45	1.6	5.16	75.71	12.21	10.1	21.12
64	male	174.0cm	67.0Kg	89cm	89cm	1.00	115mmHg	62mmHg	6.58	4.75	143	30.1	90.5	168	12	20	44.5	5.47	1.27	2.39	0.74	5.11	NULL	63	4.5	226	NULL	NULL	0.62	NULL	NULL	NULL	4.81	1.37	4.46	73.7	13.06	<10.00	15.14
65	female	150cm	58Kg	90cm	101cm	0.89	124mmHg	90mmHg	8.2	5.31	167	31.5	90.8	225	71	46	55.7	4.01	0.84	3.6	2.42	4.83	6.2	89	5.6	406	88.5	11.5	0.87	NULL	NULL	NULL	1.37	2.27	6.84	91.34	16.23	12.73	14.4
66	female	161cm	49.9Kg	73cm	91cm	0.80	138mmHg	87mmHg	7	5.47	165	30.2	91.4	271	40	28	54.8	4.5	0.76	3.62	0.78	5.38	NULL	94	4.3	355	97.37	NULL	0.79	NULL	NULL	NULL	1.99	2.4	7.25	98.92	20.61	17.02	8.06
64	female	157.0cm	60.0Kg	85cm	94cm	0.90	105mmHg	67mmHg	8.97	5.49	169	30.8	94	195	13	20	49.5	5.57	1.26	5.24	0.49	5.54	5.1	95	8.9	482	92.82	NULL	0.83	NULL	NULL	102.1	2.05	2.02	5.9	92.01	16.88	19.57	11.22
63	female	162.0cm	62.0Kg	78cm	95cm	0.82	156mmHg	85mmHg	6.18	4.87	152	31.2	95.3	191	21	22	45.2	5.46	1.08	3.62	1.59	4.94	5.1	89	6.5	378	77.45	11.2	0.93	NULL	NULL	NULL	1.36	2.04	5.8	90.7	16.7	10.5	22.87
60	female	147cm	44.8Kg	68cm	85cm	0.80	111mmHg	70mmHg	4.37	4.79	141	29.4	91.9	240	15	16	48.6	4.03	2.37	3.36	0.8	5.4	5.1	71	4.7	265	82.29	NULL	0.9	NULL	NULL	NULL	1.38	2.01	4.83	95.3	14.9	41.58	350.3
74	female	154cm	52.1Kg	75cm	93cm	0.81	115mmHg	62mmHg	7.42	4.41	131	29.7	94.6	255	17	17	46.5	5.19	1.3	3.18	0.92	4.87	5.3	81	3.1	437	58.46	NULL	1.23	NULL	NULL	NULL	0.039	2.08	4.81	91.14	14.2	<10.00	5.75
63	male	157.0cm	51.0Kg	80cm	90cm	0.89	133mmHg	69mmHg	5.25	5.37	173	32.2	93.9	170	57	31	52.6	4.13	0.87	3.36	1.89	5.12	4.7	79	4.5	508	NULL	13.8	1.03	NULL	NULL	NULL	3.86	1.83	8.48	110.8	20.75	12.78	<9.00
67	female	166.0cm	56.0Kg	78cm	88cm	0.89	110mmHg	66mmHg	6.93	4.37	130	29.7	93.6	225	10	13	48.8	4.76	1.91	1.88	1.83	6.18	5.6	86	5.6	431	94.88	15.3	0.83	NULL	NULL	100.3	1.52	1.9	4.99	104.9	18.88	11.3	101
73	male	166cm	62.7Kg	79cm	91cm	0.87	121mmHg	71mmHg	7.63	5.32	162	30.5	90.2	227	28	20	48.7	4.54	0.96	2.46	1.19	5.55	5.4	67	5	431	107.25	NULL	0.68	NULL	NULL	NULL	6.18	1.97	5.44	76.2	12.6	<10.00	11.38
60	female	151cm	64.7Kg	89cm	100cm	0.89	160mmHg	92mmHg	8.84	4.6	143	31.1	95.2	318	21	20	46.3	3.27	0.97	4.1	0.73	5.5	5.2	82	3.2	330	84.91	NULL	0.88	NULL	NULL	NULL	2	2.19	5.83	124	19.1	60.09	10.16
65	female	153.0cm	52.0Kg	73cm	92cm	0.79	132mmHg	82mmHg	3.57	3.46	119	34.4	102	89	16	16	45.5	4.52	1.1	2.63	2.05	5.03	6.1	91	4.3	523	87.38	11.7	1.14	NULL	NULL	NULL	1.67	2.4	6.49	70.4	13.67	17.5	<9.00
60	female	169cm	59.0Kg	74cm	91cm	0.81	140mmHg	81mmHg	7.18	4.28	130	30.4	93	232	14	22	48.9	5.76	1.42	3.29	1.26	5.28	NULL	60	4.8	480	NULL	11.7	0.72	4.34	140	NULL	0.701	2.25	6.41	117.8	19.36	13	9.42
66	female	155cm	52.5Kg	81cm	85cm	0.95	111mmHg	60mmHg	6.5	5.72	168	29.4	90.4	196	34	19	53.3	5.17	0.96	2.32	1.13	7.19	7.7	46	4.8	219	98.47	NULL	0.65	NULL	NULL	NULL	2.32	1.29	4.31	71.4	17.6	200.2	11.57
61	female	169cm	50Kg	66cm	86cm	0.77	103mmHg	61mmHg	7.48	4.39	138	31.4	97.3	168	21	21	49.7	5.22	1.2	3.61	1.04	5.47	4.9	81	3.7	271	77.97	NULL	0.92	NULL	NULL	NULL	8.02	2.15	6.14	122.8	19.18	<10.00	20.46
65	male	172.0cm	78.0Kg	97cm	98cm	0.99	137mmHg	88mmHg	6.57	5.57	161	28.9	86	197	19	20	48.4	4.57	0.84	2.44	1.44	5.39	5.6	79	6	285	117.8	12.7	0.87	NULL	NULL	NULL	3.46	1.74	6.16	86.51	20.66	12.2	<9.00
76	female	144cm	45.7Kg	65cm	84cm	0.77	123mmHg	60mmHg	4.56	5.01	129	25.7	82.8	257	12	19	50	5.77	1.8	4.02	0.84	5.07	NULL	52	4.2	259	NULL	NULL	0.64	NULL	NULL	NULL	1.7	1.81	4.32	105.2	14.97	<10.00	270.4
66	female	148cm	47Kg	68cm	85cm	0.80	128mmHg	90mmHg	8.22	5.4	144	26.7	78.3	390	17	18	50.3	4.26	1.22	1.88	1.01	5.13	6.3	75	2.4	294	93.46	NULL	0.85	NULL	NULL	NULL	0.791	1.73	5.2	97	16.7	10.87	10.1
71	female	148cm	44.7Kg	82cm	86cm	0.95	131mmHg	107mmHg	6.79	4.41	139	31.5	92.7	214	14	25	44.4	7.46	1.85	3.06	1.22	5.25	5.6	50	4.4	252	119.11	NULL	0.77	NULL	NULL	NULL	2.39	1.8	4.7	80.88	14.01	<10.00	174.9
65	female	154cm	68Kg	90cm	97cm	0.93	155mmHg	108mmHg	4.32	4.84	151	31.2	94.2	163	22	22	49.7	3.65	1.78	1.77	1.02	5.87	5.3	62	5.2	204	103.27	NULL	0.95	NULL	NULL	NULL	1.96	2.44	6.47	107.1	15.47	<10.00	11.67
71	female	158.0cm	63.0Kg	82cm	100cm	0.82	135mmHg	73mmHg	5.19	4.94	151	30.6	93.3	279	39	30	52.6	5.27	1.88	1.21	1.99	4.7	5.5	67	6.4	461	NULL	9.9	0.89	NULL	NULL	NULL	0.777	2.1	5	79.79	15.48	12.8	<9.00
62	male	157cm	85Kg	115cm	109cm	1.06	147mmHg	81mmHg	6.77	5.43	146	26.9	83.1	304	32	25	44.5	4.95	1.05	1.45	1.93	4.59	5.3	71	3.8	403	101.82	8.8	0.85	4	140.8	NULL	2.89	1.42	4.6	76.3	16.4	15.3	<5.00
62	male	174cm	63.9Kg	81cm	90cm	0.90	116mmHg	73mmHg	6.59	4.73	138	29.2	93.2	144	25	28	50.1	6.33	1.39	3.02	0.9	5.37	5.4	63	6.5	237	99.88	14.6	0.79	NULL	NULL	NULL	7.34	1.78	4.34	93.64	13.83	<10.00	>600.00
64	female	156cm	59Kg	77cm	92cm	0.84	128mmHg	86mmHg	3.89	4.47	142	31.8	96.6	143	7	17	46.5	4.81	1.41	3.02	1.71	5.39	6.4	58	4	265	NULL	12.1	0.81	NULL	NULL	101.9	3.33	1.65	4.7	87.33	14.22	12	<9.00
65	female	168cm	69Kg	83cm	100cm	0.83	141mmHg	83mmHg	5.45	4.35	142	32.6	98.2	230	9	18	47.2	4.39	1.61	2.56	1.13	5.29	5.7	53	7	335	NULL	11	0.73	NULL	NULL	NULL	2.14	1.35	3.81	91.5	16.91	13.78	13.62
69	female	155cm	53.9Kg	80cm	90cm	0.89	131mmHg	56mmHg	4.87	4.43	130	29.3	95.3	101	33	38	52	4.8	1.46	2.31	1.09	5.07	4.9	68	4.5	264	91.71	NULL	0.76	NULL	NULL	NULL	6.31	1.56	4.22	99.2	16.3	<10.00	12.07
69	male	174cm	68Kg	86cm	100cm	0.86	123mmHg	83mmHg	8.6	5.89	166	28.2	82.3	210	39	34	47.5	6.78	0.77	3.24	2.08	5.02	6.9	54	5.9	393	NULL	11.5	0.75	4.12	142.7	NULL	1.98	2.34	6.05	110.8	18.45	12.6	9.81
66	female	145cm	49Kg	68cm	83cm	0.82	110mmHg	60mmHg	5.86	5.59	167	29.9	89.3	278	25	17	49.8	4.11	1.6	3.32	0.93	4.99	5.5	48	3.9	256	114.12	NULL	0.61	NULL	NULL	NULL	1.79	1.5	4.53	80.7	14.28	<10.00	15.58
66	female	156cm	55Kg	79cm	95cm	0.83	107mmHg	67mmHg	6.01	5.42	152	28	87.8	256	19	23	49.5	6.11	1.87	2.35	1	5.78	5.8	62	4.8	236	99	11.1	0.82	NULL	NULL	NULL	4	1.47	4.46	78.9	16.2	<10.00	11.89
62	female	166cm	68Kg	78cm	95cm	0.82	123mmHg	60mmHg	6.74	4.68	139	29.7	90.8	209	10	17	48.1	3.66	1.57	3.11	1.09	4.47	5.2	46	5.2	275	125.91	NULL	0.65	NULL	NULL	NULL	1.95	1.28	4.91	78.7	15.79	<10.00	<5.00
68	female	162.0cm	61.6Kg	83cm	89cm	0.93	145mmHg	74mmHg	5.65	4.25	129	30.4	94.6	284	12	17	49.8	4.43	1.24	3.76	0.92	5.42	NULL	72	2.8	312	NULL	NULL	0.77	NULL	NULL	NULL	2.77	2	5.81	104.4	17.4	525.5	15.37
67	male	166.0cm	63.0Kg	79cm	93cm	0.85	100mmHg	64mmHg	7.44	5.55	176	31.7	95.5	174	35	22	48.2	5.12	0.85	2.19	0.92	7.42	5.9	105	5.3	436	76.66	NULL	1	NULL	NULL	100.9	2.15	1.86	5.19	104.7	18.25	<10.00	6.85
71	female	151cm	59Kg	79cm	93cm	0.85	121mmHg	76mmHg	4.28	4.28	133	31.1	96.3	119	17	20	47.9	5.43	1.57	3.13	0.8	5.11	NULL	52	6	158	115.13	NULL	0.75	NULL	NULL	103.9	1.03	1.43	4.16	106.7	17.6	<10.00	9.19
68	female	160cm	55.8Kg	70cm	92cm	0.76	101mmHg	57mmHg	5.26	5.14	158	30.7	94.2	158	44	25	51	4.1	1	2.54	0.84	4.97	NULL	68	3.9	320	NULL	NULL	1.13	NULL	NULL	NULL	5.64	1.47	4.56	90.92	15.94	<10.00	60.01
71	female	151cm	52Kg	76cm	91cm	0.84	128mmHg	64mmHg	7.14	4.02	124	30.8	97.3	289	11	16	45.8	4.62	1.73	2.45	1.03	5.51	5.7	69	4.3	209	95.98	NULL	0.82	NULL	NULL	NULL	1.24	1.8	5.83	110.6	18.88	11.98	8.15
65	female	163.0cm	68.0Kg	84cm	99cm	0.85	159mmHg	89mmHg	5.58	4.53	135	29.8	93.6	110	24	21	51.1	6.05	1.23	2.32	3.46	4.82	NULL	74	6.5	314	92.64	15.4	0.77	NULL	NULL	NULL	3.96	1.95	6.23	113	22.8	13.1	13.14
81	female	149cm	59.6Kg	93cm	95cm	0.98	127mmHg	66mmHg	4.57	4.7	141	30	91.7	224	12	13	51.6	4.24	1.28	1.76	0.84	5.34	NULL	67	5.2	277	105.21	13.7	0.71	NULL	NULL	NULL	2.28	2.24	6.4	106.4	17.24	<10.00	20.7
61	female	149.0cm	52.0Kg	83cm	93cm	0.89	152mmHg	90mmHg	5.11	5.01	146	29.1	94	141	15	20	49.8	4.71	1.16	4.14	2.24	5.68	5.7	65	6.1	376	NULL	12.3	0.79	NULL	NULL	NULL	2.52	1.3	4.39	52.34	10.14	412.1	<9.00
65	female	156cm	56Kg	77cm	90cm	0.86	142mmHg	75mmHg	5.42	4.64	141	30.4	93.3	196	13	20	45.2	6.09	1.8	3.29	0.66	4.95	4.9	77	4.3	329	110.2	NULL	0.79	NULL	NULL	NULL	1.25	1.95	5.25	110	18.1	331.5	25.83
67	male	157.0cm	64.0Kg	89cm	95cm	0.94	133mmHg	83mmHg	6.67	4.03	80	19.9	72.5	199	7	10	44.3	4.21	1.34	3.67	2.76	9.26	NULL	95	5.3	393	78.42	14.9	0.9	NULL	NULL	NULL	1.73	1.74	4.86	120	18.77	12.9	212
61	female	158cm	68.8Kg	80cm	98cm	0.82	117mmHg	73mmHg	3.95	3.95	122	30.9	96.7	207	10	13	46.5	4.35	2.03	3.32	0.68	5.69	NULL	89	5.5	360	NULL	NULL	0.91	NULL	NULL	105.1	3.17	1.4	4.62	81.82	17.14	10.4	<9.00
60	male	165cm	72Kg	97cm	104cm	0.93	141mmHg	96mmHg	5.41	4.86	147	30.2	91.4	201	23	19	48	5.89	1.15	2.04	0.94	5.27	5.6	46	4.1	383	NULL	16.8	0.81	NULL	NULL	NULL	5.13	2.76	5.8	118.6	17.53	<10.00	18.01
66	female	156.0cm	54.0Kg	71cm	95cm	0.75	124mmHg	87mmHg	3.61	4.38	107	24.4	83.8	200	34	25	45.8	4.29	1.8	3.79	0.41	4.57	5	51	3.6	286	NULL	NULL	0.75	4.11	142.8	NULL	2.08	1.49	4.45	103.6	18.68	16.87	9.63
63	female	153.0cm	49.0Kg	73cm	89cm	0.82	138mmHg	77mmHg	7.48	5	141	28.2	90.4	147	22	24	48.5	4.5	1.64	4.24	1.33	5.52	NULL	63	3.8	265	NULL	10.7	0.78	NULL	NULL	NULL	3.78	2.14	4.61	102.4	15.82	10.5	12.07
75	female	154.0cm	56.0Kg	93cm	97cm	0.96	139mmHg	82mmHg	5.1	5.72	169	29.5	87.6	210	32	21	50.9	3.96	1.39	4.63	2.27	5.17	7.6	68	4.9	493	NULL	12.8	0.84	NULL	NULL	102.3	2.76	1.54	5.45	71.32	16.27	<10.00	<9.00
61	male	169cm	57Kg	70cm	92cm	0.76	96mmHg	51mmHg	4.87	5.88	165	28.1	88.1	223	65	36	46.8	6.11	1.67	1.94	0.54	5.38	NULL	74	7.6	341	NULL	NULL	0.75	NULL	NULL	NULL	2.98	1.94	4.87	107.2	18.13	<10.00	<9.00
65	female	149.0cm	51.0Kg	83cm	90cm	0.92	141mmHg	75mmHg	4.57	5.32	162	30.5	90.6	208	107	41	48.4	5.27	1.1	2.22	0.59	7.2	NULL	71	4.7	347	NULL	NULL	0.75	NULL	NULL	NULL	4.97	1.72	4.72	111.1	19.51	21.3	11.07
60	male	170cm	70Kg	84cm	95cm	0.88	122mmHg	81mmHg	9.95	5.63	172	30.6	90.9	237	58	32	48.4	4.17	0.92	3.15	0.54	4.87	NULL	64	7.9	281	NULL	NULL	0.67	NULL	NULL	NULL	2	1.63	5.34	93.52	15.51	16.23	10.6
60	female	165cm	64.2Kg	89cm	101cm	0.88	118mmHg	71mmHg	9.66	5.33	155	29.1	91	181	26	26	49.4	4.3	1.23	2.71	0.78	4.77	9.4	63	4.9	352	NULL	NULL	0.74	NULL	NULL	NULL	3.84	1.76	4.92	87.62	14.57	19.68	16.74
65	male	155cm	56Kg	82cm	93cm	0.88	152mmHg	88mmHg	5.01	4.63	144	31.1	93.7	222	17	26	51.8	3.56	1.15	2.64	2.24	5.84	NULL	88	3.6	367	89.72	17.6	0.85	NULL	NULL	NULL	4.08	1.41	4.21	88.12	14.84	14.93	<9.00
73	male	162.0cm	60.0Kg	77cm	86cm	0.90	116mmHg	77mmHg	5.38	5.03	162	32.2	97.6	190	13	26	44.2	5.07	1.51	2.84	2.03	5.57	5.8	69	5.3	418	NULL	13.7	0.85	5.2	140.4	100.3	3.13	1.31	4.33	68.39	15.18	11.5	<9.00
63	male	151.0cm	47.0Kg	75cm	88cm	0.85	128mmHg	86mmHg	7	5.38	161	29.9	90.3	252	34	24	47.1	3.8	1.39	3.1	2.12	5.34	NULL	86	5.2	539	NULL	11.2	0.77	NULL	NULL	101.6	1.55	1.41	4.97	69.24	14.34	<10.00	<9.00
60	female	159cm	57Kg	73cm	94cm	0.78	131mmHg	72mmHg	5.07	5.22	163	31.2	95.4	218	39	29	48	5.38	1.08	3.69	1.01	5.06	5.7	70	4.5	338	86.7	NULL	0.6	NULL	NULL	NULL	1.45	1.28	4.12	114	18.3	<10.00	10.82
73	male	170.0cm	64.0Kg	87cm	99cm	0.88	135mmHg	81mmHg	7.35	5.54	172	31	89.2	292	34	25	51.6	4.99	1.02	2.41	2.05	5.17	NULL	94	3.9	459	94.01	15.3	1.09	NULL	NULL	NULL	4.32	2.06	5.9	94.99	16.15	41.3	<9.00
72	male	161cm	55Kg	81cm	94cm	0.86	148mmHg	84mmHg	7.55	4.21	133	31.6	95.7	143	12	19	49.9	3.68	1.41	3.04	2.17	4.91	7.8	78	3.6	308	99.35	12.1	0.71	NULL	NULL	101.9	3.04	1.71	4.89	96.9	14.7	11.5	<9.00
83	male	162.0cm	51.0Kg	77cm	84cm	0.92	181mmHg	104mmHg	5.45	4.12	124	30.1	93	135	15	22	44.5	4.4	1.92	2.77	1.33	5.88	5.7	69	6.2	305	NULL	40.6	0.78	4.28	134.3	NULL	2.18	1.59	4.31	90.87	16.26	13	10.21
72	male	157.0cm	57.0Kg	84cm	87cm	0.97	158mmHg	74mmHg	6.48	4.76	136	28.6	89.5	304	16	17	50.6	4.83	1.19	2.47	1.33	5.02	5	87	4.2	436	NULL	33.4	0.96	NULL	NULL	NULL	1.74	1.78	5.72	89.86	17.65	16.56	210.3
67	male	155.0cm	61.0Kg	85cm	94cm	0.90	150mmHg	99mmHg	5.37	5.03	164	32.6	99	312	11	20	54.6	4.02	1.25	3.97	3.45	5.69	5.6	68	4.6	368	99.77	8.8	0.81	NULL	NULL	NULL	1.29	2.06	5.6	101.3	19.63	20.26	7.01
77	female	155cm	56.8Kg	82cm	95cm	0.86	109mmHg	67mmHg	4.8	3.94	123	31.2	97.7	206	11	22	47.2	3.93	2.15	2.92	0.56	5.17	5	64	5.5	232	110.42	NULL	0.8	NULL	NULL	NULL	1.28	1.74	4.93	89.8	17.5	<10.00	10.3
75	female	146cm	36Kg	58cm	82cm	0.71	103mmHg	53mmHg	6.01	5.21	167	32.1	93.7	174	47	24	51.3	3.86	0.92	2.34	1.03	5.5	NULL	61	5.8	229	NULL	NULL	0.75	NULL	NULL	NULL	2.68	2.01	5.66	92.09	16.43	15.2	6.94
68	male	168cm	73Kg	93cm	99cm	0.94	145mmHg	70mmHg	5.73	4.44	128	28.8	92.6	372	29	30	42.2	4.67	1.48	2.9	2.03	4.75	6.4	66	3.6	482	NULL	17.6	0.75	4.05	140.9	NULL	1.51	2.57	6.38	119.3	18.58	14	12.83
64	male	176.0cm	61.0Kg	78cm	90cm	0.87	144mmHg	67mmHg	5.58	4.85	155	32	93.8	261	23	21	48.9	4.99	1.34	1.85	2.74	4.74	5.8	93	4.2	473	81.6	21.7	0.91	NULL	NULL	NULL	2.35	1.74	5.05	90.7	14.9	<10.00	7.45
62	female	159.0cm	56.0Kg	78cm	92cm	0.85	120mmHg	74mmHg	5.12	4.44	138	31.1	93.2	139	15	18	46.2	5.74	1.48	3.71	1.42	4.71	6	84	3	322	88.47	9.1	0.81	NULL	NULL	101.4	1.26	1.83	5.26	102	16.8	12.1	8.96
69	male	153cm	50.7Kg	71cm	84cm	0.85	144mmHg	52mmHg	6.83	5.78	167	28.9	90	149	42	30	46.8	6.32	1.2	3.27	0.81	7.79	5.9	59	5.2	241	102.95	12.9	0.87	NULL	NULL	100	3.96	1.75	4.55	102	15	<10.00	7.12
61	female	155cm	50.1Kg	73cm	87cm	0.84	135mmHg	77mmHg	6.83	5.98	172	28.8	82.4	190	39	36	48.8	5.03	1.49	3.11	0.55	4.91	5	90	5.5	396	97.7	NULL	0.9	NULL	NULL	NULL	1.23	1.76	5.76	111.6	23.45	244.7	10.63
64	male	168cm	62Kg	79cm	88cm	0.90	112mmHg	69mmHg	5.68	5.62	172	30.6	90	203	110	56	48.8	6.62	0.97	3.51	1.11	4.69	9.8	72	5.6	400	108.61	12.8	0.71	NULL	NULL	NULL	3.69	2.16	5.76	112.5	15.12	12.46	17.89
70	female	158cm	62Kg	82cm	91cm	0.90	161mmHg	82mmHg	6.12	4.9	156	31.8	97.8	279	44	25	52.1	4.9	1.1	2.44	1	5.53	5	62	4.9	261	NULL	NULL	0.59	NULL	NULL	NULL	6.68	1.54	4.51	78.66	15.11	<10.00	15
62	female	150.0cm	55.0Kg	83cm	99cm	0.84	134mmHg	80mmHg	5.25	5.1	165	32.4	99.2	208	25	24	49.6	4.95	0.92	2.81	1.89	5.49	5.6	91	3.5	430	NULL	9	0.93	NULL	NULL	NULL	2.01	1.55	4.81	96.21	13.78	10.05	94.8
61	male	162cm	75Kg	87cm	97cm	0.90	NULL	NULL	4.95	4.18	99	23.7	75.6	188	11	18	46.7	3.91	1.46	4.59	1.11	5.35	5.3	77	5.3	287	112.55	19.7	0.81	NULL	NULL	NULL	1.63	1.62	5.51	89.1	17.9	26.19	206.6
65	male	171cm	72Kg	95cm	97cm	0.98	138mmHg	87mmHg	4.93	4.86	123	25.3	81.3	331	16	15	47.9	5.14	1.43	3.16	1.34	9.86	5.7	68	3.1	211	NULL	28.2	0.72	4.67	137.1	102.9	5.4	1.43	4.43	76.71	12.84	12.2	>600.00
60	female	163cm	73Kg	81cm	93cm	0.87	127mmHg	81mmHg	4.9	5.21	156	29.9	92.7	154	22	24	51.9	4.99	1.61	2.87	1.08	5.71	5.7	55	3.9	501	115.5	NULL	0.77	4.31	144.1	NULL	2.83	2.46	6.26	125.5	18.01	<10.00	6.77
62	female	154cm	46.6Kg	72cm	87cm	0.83	119mmHg	76mmHg	8.15	5.72	160	28	87.9	315	52	32	52.6	4.67	0.91	3.2	1.17	4.87	NULL	79	3.3	340	NULL	12	0.65	NULL	NULL	NULL	2.44	1.73	5.68	93.4	17.5	<10.00	<5.00
69	female	154cm	56.1Kg	76cm	90cm	0.84	134mmHg	98mmHg	4.68	5.36	149	27.8	87.5	248	24	25	49.6	4.29	1.49	4.53	0.84	5.35	5.2	47	5.1	216	NULL	NULL	0.69	NULL	NULL	NULL	2.98	1.79	4.28	84.72	12.51	>4000.00	16.03
62	female	168.0cm	56.0Kg	73cm	93cm	0.78	111mmHg	51mmHg	6.1	4.83	145	30	91.9	234	20	21	49.2	3.54	1.03	3.28	0.69	5.26	5.6	58	8.7	264	108.75	NULL	1.17	NULL	NULL	NULL	0.005	3.06	12.25	150.4	43.75	<10.00	<9.00
65	male	154.0cm	50.0Kg	74cm	87cm	0.85	111mmHg	71mmHg	6.33	5.4	161	29.8	89.8	153	41	33	45.8	3.87	0.99	3.45	0.73	4.84	NULL	63	6.6	266	NULL	NULL	0.85	NULL	NULL	NULL	3.7	1.7	4.72	124	20.13	16.28	28.02
75	female	153cm	50Kg	74cm	88cm	0.84	150mmHg	80mmHg	5.69	4.92	133	27	86.6	147	24	25	49.5	5.99	1.5	4.02	1.22	5.73	5.2	88	5.2	380	103.98	19.2	0.85	NULL	NULL	NULL	2.08	1.9	6.28	89.8	17.9	<10.00	12.63
60	male	163.0cm	73.0Kg	88cm	103cm	0.85	137mmHg	80mmHg	4.7	4.07	123	30.2	94.3	190	17	19	48.1	3.4	1.22	3.33	1.31	5.29	NULL	62	3.9	189	NULL	10.9	0.71	NULL	NULL	NULL	5.94	1.45	4.53	92.52	18.74	18.67	239.1
85	male	155cm	59.0Kg	90cm	96cm	0.94	124mmHg	61mmHg	5.12	5.77	140	24.3	78.5	295	22	18	45.4	3.99	1.18	2.75	2.05	4.91	5.5	109	4.1	439	NULL	13.8	1.03	NULL	NULL	NULL	2.49	1.96	5.59	100.4	18.13	1591	<9.00
62	male	160.0cm	69.0Kg	94cm	96cm	0.98	141mmHg	65mmHg	5.59	4.18	134	32.1	95	172	22	16	48.8	3.66	1.22	1.91	0.86	5.23	5.6	53	5.8	261	NULL	14.2	0.75	NULL	NULL	NULL	2.79	1.33	4.29	90.74	22.93	<10.00	7.76
68	male	169cm	75Kg	100cm	101cm	0.99	117mmHg	78mmHg	4.99	4.86	139	28.6	90.5	317	10	14	48.1	3.45	1.55	2.04	0.55	5.12	5.1	57	4.2	271	NULL	15.7	0.63	NULL	NULL	NULL	1.6	2.05	4.65	106	18.83	<10.00	<9.00
69	female	157cm	54Kg	72cm	90cm	0.80	108mmHg	60mmHg	5.55	4.57	142	31.1	95	147	33	22	47.2	5.65	1.23	2.25	0.66	5.04	5.9	50	3.9	288	103.5	NULL	0.76	NULL	NULL	NULL	3.1	1.57	4.59	80.22	16.66	10.24	12.24
72	male	159cm	60Kg	85cm	95cm	0.89	106mmHg	60mmHg	4.53	4.59	117	25.5	86.5	352	8	14	45.7	4.72	1.29	2.48	1	4.81	5.5	88	5.7	338	84.22	NULL	0.83	NULL	NULL	NULL	1.85	1.81	4.72	106.3	17.42	<10.00	11.5
67	female	151.0cm	59.0Kg	83cm	99cm	0.84	144mmHg	65mmHg	4.55	4.54	132	29.1	86.1	185	13	19	48.4	3.6	1.7	3.17	2.12	6.39	5.6	94	5	401	79.98	11.5	1.11	NULL	NULL	NULL	1.73	1.51	4.82	83.35	15.27	15.8	<9.00
61	male	167cm	74Kg	90cm	100cm	0.90	110mmHg	74mmHg	10.57	5.37	164	30.5	91.6	259	16	16	49.2	4.99	1.34	3.3	1.11	8.07	5.2	60	4.3	332	NULL	NULL	0.78	NULL	NULL	NULL	5.33	1.98	5.76	87.35	18.78	<10.00	10.45
68	male	174cm	59Kg	80cm	90cm	0.89	104mmHg	56mmHg	5.51	6.02	167	27.7	85.2	206	15	20	50.2	7.67	0.73	3.24	2.24	5.99	5.3	86	3.3	372	NULL	9.5	0.8	4.45	141.9	NULL	5.58	1.56	5.24	81.73	17.5	11.5	<9.00
68	female	144cm	59Kg	93cm	96cm	0.97	134mmHg	67mmHg	7.6	4.63	140	30.2	94.2	298	38	23	42.7	4.61	0.85	1.64	2.66	6.12	5.7	122	5.9	411	53.64	13.1	1.07	NULL	NULL	100.8	1.74	1.87	4.98	109	14.9	<10.00	145
61	female	163cm	52.9Kg	69cm	87cm	0.79	116mmHg	70mmHg	5.02	3.72	117	31.5	96.8	150	12	19	43.9	5.59	1.17	1.94	0.81	5.16	NULL	59	4.3	351	NULL	NULL	0.71	NULL	NULL	103.1	3.97	1.8	4.73	102.2	15.03	<10.00	5.5
77	male	161.0cm	54.0Kg	76cm	89cm	0.85	142mmHg	71mmHg	3.73	4.61	138	29.9	92.2	193	9	17	49.7	5.11	1.4	2.92	0.65	5.09	5.1	64	4.1	281	114.37	NULL	0.61	NULL	NULL	NULL	1.13	1.07	3.63	60.5	13	<10.00	103.2
60	female	165cm	68Kg	93cm	92cm	1.01	163mmHg	77mmHg	6.65	4.78	160	33.5	102.5	144	36	24	47.3	5.01	1.21	3.41	0.7	9.8	NULL	61	7.3	227	NULL	12.5	0.71	NULL	NULL	101	1.1	1.34	4.5	72.85	15.35	<10.00	6.75
61	female	163.0cm	71.0Kg	80cm	99cm	0.81	116mmHg	84mmHg	4.41	4.89	144	29.4	93	243	13	17	53.7	3.65	1.32	3.46	1.15	5.42	5.3	90	2.9	326	88.55	NULL	0.87	NULL	NULL	NULL	2.42	1.59	5.04	115.7	22.69	13.82	11.03
60	male	160cm	60.6Kg	87cm	88cm	0.99	151mmHg	84mmHg	4.18	5.35	159	29.7	86.4	171	16	21	52	4.74	1.14	2.03	1.2	7.26	5.4	71	3.4	322	127.49	13.3	0.83	NULL	NULL	NULL	2.38	2.06	6.07	104.1	19.41	<10.00	20.66
65	female	160.0cm	63.0Kg	89cm	95cm	0.94	134mmHg	85mmHg	7.98	5.02	167	33.3	100	264	30	19	46.4	5.39	0.93	3.33	1.9	5.11	5.8	78	7.1	338	84.53	11.8	0.89	NULL	NULL	NULL	5.94	1.77	4.46	91.1	12.8	13.4	17.2
61	male	174cm	68Kg	82cm	91cm	0.90	117mmHg	78mmHg	6.34	5.15	159	30.9	93.4	257	43	29	48	5.24	1.1	NULL	0.82	NULL	5.7	55	4.2	217	109.12	NULL	0.7	NULL	NULL	NULL	8.33	1.72	3.65	107	15.1	<10.00	12.37
60	female	166cm	59.5Kg	78cm	87cm	0.90	111mmHg	71mmHg	3.96	4.72	142	30.1	87.1	202	19	24	47.3	6.3	2.44	2.71	0.95	8.45	5.8	105	3.8	364	69.48	NULL	1.02	NULL	NULL	NULL	1.8	1.19	4.31	62.22	18.7	<10.00	19.58
61	female	154cm	64Kg	84cm	95cm	0.88	114mmHg	51mmHg	4.71	4.21	128	30.4	94.5	234	16	16	44.7	6.13	1.35	4.23	0.88	5.15	6	66	6.8	271	88.63	NULL	0.8	NULL	NULL	NULL	3.08	1.51	4.71	64.87	12.5	<10.00	10.57
61	female	169.0cm	62.0Kg	76cm	92cm	0.83	109mmHg	70mmHg	7.41	4.77	161	33.8	99.4	254	35	23	46	6.75	1.21	3.64	0.86	4.04	5.9	50	3.8	350	NULL	6.2	0.79	NULL	NULL	101.8	2.58	1.6	5.37	80	16.27	<10.00	12.57
67	male	173cm	67Kg	77cm	92cm	0.84	106mmHg	60mmHg	7.75	5.06	162	32	96.4	260	34	23	42.9	4.28	0.8	4.36	1.64	5.19	NULL	92	7.3	354	87.45	15	0.88	NULL	NULL	NULL	1.67	2.11	5.78	106.7	16.69	15	<9.00
68	female	156cm	54.3Kg	79cm	93cm	0.85	125mmHg	62mmHg	5.45	3.88	116	29.9	97.4	237	20	20	48.2	4.12	1.81	3.68	0.76	5.39	5.9	55	4.7	176	NULL	14.8	0.68	NULL	NULL	NULL	3.94	1.64	5.3	97.36	20.1	<10.00	14.89
61	female	163.0cm	53.0Kg	70cm	94cm	0.74	124mmHg	76mmHg	4.42	3.98	122	30.7	93.2	73	19	21	49.3	3.65	1.56	3.33	0.7	4.76	5.2	62	4.5	202	NULL	NULL	0.74	NULL	NULL	NULL	2.52	1.54	4.31	91.6	14.98	14.23	17.52
64	male	172.0cm	85.0Kg	95cm	110cm	0.86	125mmHg	78mmHg	7.49	4.52	139	30.8	93.4	169	29	30	48.5	5.65	1.28	3.75	1.69	5.09	5.3	85	4.1	475	98.97	11	0.87	NULL	NULL	NULL	1.66	1.67	5.3	84.4	16.4	10.5	24.01
64	male	165.0cm	60.0Kg	82cm	89cm	0.92	131mmHg	81mmHg	7.33	4.67	138	29.6	96.1	384	7	14	53.2	4.31	1.83	3.78	0.92	4.98	5.1	83	3.6	350	110.05	NULL	0.85	NULL	NULL	NULL	0.047	1.56	5.85	106	26.7	20.54	13.41
65	female	160.0cm	57.0Kg	79cm	95cm	0.83	121mmHg	69mmHg	6.18	4.86	139	28.6	90.9	236	9	17	46.3	5.01	2.17	2.5	0.47	5.12	5.8	89	3.4	330	74.77	NULL	0.97	4.48	144.5	NULL	2.38	1.6	4.06	101.2	18.05	10.8	6.11
68	female	155.0cm	60.0Kg	84cm	97cm	0.87	130mmHg	83mmHg	7.08	4.77	150	31.4	92.9	263	14	20	47	4.29	1.29	2.97	1.97	5.73	6.1	71	5.4	374	98.31	9.9	0.98	4.38	138.5	NULL	1.06	2.41	5.32	145	19.4	38.2	15.44
62	male	167.0cm	64.0Kg	86cm	95cm	0.91	118mmHg	71mmHg	7.41	4.49	135	30.1	93.3	252	18	17	50	4.26	1.11	3.81	0.37	5.28	5.5	60	4.4	258	105.3	19.5	0.6	NULL	NULL	NULL	2.23	1.23	3.75	60.6	13	13.72	<9.00
61	female	152.0cm	62.0Kg	96cm	100cm	0.96	127mmHg	60mmHg	6.11	4.64	142	30.6	95.9	217	13	20	47.7	6.46	2.23	3.97	0.67	5.02	5.2	60	3.5	222	NULL	10.9	0.73	NULL	NULL	NULL	2.49	1.82	4.75	94.86	16.79	900.2	5.8
62	male	169cm	57Kg	74cm	91cm	0.81	126mmHg	80mmHg	5.1	4.79	138	28.8	89.1	155	7	15	46.3	5.66	1.36	2.55	1.6	7.78	NULL	101	4.3	392	59.82	13.5	1.3	NULL	NULL	NULL	3.07	1.71	4.78	85.3	13.7	<10.00	15.47
61	male	169cm	67Kg	85cm	99cm	0.86	114mmHg	75mmHg	6.14	6.88	136	19.8	65.6	317	23	25	54.1	3.17	1.3	2.44	0.91	3.98	5.7	53	3.5	297	105.9	NULL	0.72	NULL	NULL	NULL	1.33	1.76	4.57	99.52	15.39	69.84	8.7
61	male	168cm	75Kg	93cm	99cm	0.94	127mmHg	66mmHg	6	4.82	146	30.3	89.8	225	15	18	46.9	4.63	1.14	1.96	0.89	6.38	5.8	64	6.6	360	NULL	NULL	0.82	NULL	NULL	NULL	3.62	2.01	4.96	98.95	15.47	<10.00	19.38
66	male	171.0cm	69.0Kg	94cm	101cm	0.93	122mmHg	67mmHg	7.02	5	152	30.4	89	177	60	28	48.3	5.11	0.89	3.19	1.82	4.97	4.8	92	5.4	475	97.17	16.5	0.86	NULL	NULL	NULL	1.18	1.54	5.08	71.37	15.99	11.7	9.59
64	male	170.0cm	68.0Kg	93cm	94cm	0.99	120mmHg	79mmHg	5.32	5.14	148	28.8	83.7	149	38	29	47	4.45	1.25	1.55	2.32	5.26	5.3	110	6.8	478	NULL	18.8	1.01	4.35	141.8	98.6	6.25	1.69	5.65	115	17.5	<10.00	7.55
68	male	173cm	78Kg	89cm	100cm	0.89	139mmHg	84mmHg	6.23	4.86	149	30.7	94.2	279	10	16	48.2	4.8	1.51	3.15	0.84	5.17	5.2	73	3.9	296	NULL	21.1	0.73	NULL	NULL	NULL	1.91	1.7	5.61	96.6	17.9	<10.00	9.68
61	female	166cm	62Kg	76cm	95cm	0.80	110mmHg	57mmHg	5.27	4.74	150	31.6	99.8	252	14	20	48.6	4.99	1.87	3.84	1.06	5.32	5.2	79	4.6	290	NULL	NULL	0.62	NULL	NULL	NULL	1.08	1.23	4.8	77.2	19.73	364.3	13.04
60	male	167.0cm	70.0Kg	90cm	101cm	0.89	121mmHg	76mmHg	6.76	4.65	133	28.6	89.2	381	9	14	48.9	6	1.46	4.2	1.42	5.01	5.4	49	4.3	242	125.95	16.2	0.61	NULL	NULL	NULL	2.44	1.74	5.02	75.84	16.52	10.2	16.57
60	female	172cm	68Kg	77cm	95cm	0.81	140mmHg	86mmHg	6.65	4.23	134	31.7	96	157	21	23	41.6	4.16	1.04	3.47	0.95	5.05	NULL	52	4	287	NULL	NULL	0.71	NULL	NULL	NULL	2.22	1.69	4.77	115.9	20.75	118.9	22.43
64	male	169cm	64Kg	80cm	93cm	0.86	115mmHg	71mmHg	6.39	4.79	144	30.1	91.2	167	17	18	50.4	6.34	1.65	2.94	2.32	5.56	5.3	121	8.2	471	NULL	13.7	1.03	NULL	NULL	NULL	3.74	1.47	4.33	80.97	14.55	11.4	13.35
64	male	164.0cm	76.0Kg	99cm	102cm	0.97	155mmHg	88mmHg	5.82	4.82	141	29.3	90.2	235	12	17	48.8	4.84	1.67	2.98	1.47	5.73	NULL	55	4	318	NULL	NULL	0.76	NULL	NULL	NULL	6.4	2.03	4.39	105.8	15.24	<10.00	9.5
71	male	172cm	77Kg	93cm	100cm	0.93	132mmHg	81mmHg	6.63	4.84	160	33.1	94.2	214	19	30	45.3	5.84	1.1	3.22	2.78	5.85	NULL	65	4.3	315	NULL	13.6	0.97	NULL	NULL	NULL	3.85	1.57	4.58	89.24	13.93	11.63	6.68
77	female	141cm	39.7Kg	71cm	79cm	0.90	115mmHg	73mmHg	7.96	5.39	165	30.6	91.1	163	39	23	49.7	5.63	0.83	2.08	0.62	6.88	5.2	61	5.6	244	122.23	NULL	0.71	NULL	NULL	NULL	2.62	1.78	4.66	104	16.5	<10.00	6.57
72	female	155cm	54Kg	73cm	92cm	0.79	158mmHg	77mmHg	6.03	4.52	147	32.5	95.1	203	35	32	46.1	2.86	1.21	3.82	0.95	6.36	NULL	93	2.9	573	NULL	NULL	0.91	NULL	NULL	104	1.23	2.79	7.35	126.3	20.25	12.95	9.23
72	female	162cm	72Kg	96cm	103cm	0.93	122mmHg	70mmHg	7.46	5.02	155	30.9	92.4	264	12	18	49.4	4.14	1.12	3.68	2.05	5.16	5.9	68	5.3	302	80.25	12.9	0.89	NULL	NULL	NULL	1.35	2.33	5.51	115	14.9	10.3	<9.00
68	female	150cm	63Kg	99cm	94cm	1.05	131mmHg	80mmHg	6.02	4.77	143	30	91.8	196	42	27	44.1	5.75	1.66	1.59	0.42	7.96	5.4	48	4.5	316	NULL	17.1	0.61	NULL	NULL	NULL	4.85	1.71	4.81	78.27	13.79	<10.00	8.08
68	female	145cm	48.4Kg	80cm	86cm	0.93	140mmHg	76mmHg	9.99	5.13	159	31	95.9	231	19	17	48.6	6.03	1.4	4.59	0.67	6.13	5.2	59	4.7	324	NULL	NULL	0.65	NULL	NULL	NULL	2.4	1.79	4.23	106.4	16.15	12.42	17.73
64	male	166cm	81Kg	90cm	106cm	0.85	140mmHg	74mmHg	5.65	3.81	117	30.7	96.6	243	12	19	51.1	5.01	1.99	2.63	1.06	5.02	5.3	67	3.8	237	90.14	14.4	0.74	NULL	NULL	NULL	1.28	2.01	5.23	100.7	14.29	<10.00	18.09
77	male	NULL	NULL	NULL	NULL	NULL	NULL	NULL	7.96	5.54	171	30.9	93.5	213	22	27	48.6	4.97	1.24	3.85	0.56	7.17	5.4	65	5.3	290	87.78	NULL	0.84	NULL	NULL	NULL	1.63	1.52	3.75	129	17.2	14.41	14.78
60	male	171cm	84Kg	97cm	100cm	0.97	159mmHg	91mmHg	6.48	5.25	162	30.9	90.1	279	43	29	45.2	5.5	1.04	2.38	1.03	4.8	5.9	84	5.4	241	NULL	NULL	0.89	NULL	NULL	NULL	5.22	1.95	4.98	96.98	15.57	<10.00	21.19
63	female	163cm	53Kg	72cm	82cm	0.88	127mmHg	78mmHg	5.95	5.04	147	29.2	92.1	167	20	22	47.6	6.04	1.25	4.79	0.72	4.93	4.8	52	5.2	369	NULL	16.8	0.64	NULL	NULL	NULL	1.72	1.54	4.22	94.32	16.82	12.31	12.45
61	female	154cm	61Kg	80cm	93cm	0.86	115mmHg	60mmHg	5.54	4.93	150	30.4	90.3	249	57	36	45.9	4.1	1.14	3.3	0.81	5.61	NULL	95	6.8	485	NULL	14.3	0.79	NULL	NULL	NULL	1.6	1.4	5.32	77.29	18.94	1366	8.75
78	female	156cm	66Kg	84cm	94cm	0.89	159mmHg	74mmHg	6.59	5.23	157	30	89.1	194	25	22	53.6	5.11	0.86	3.53	1.13	8.75	4.9	72	4.8	415	122.38	NULL	0.97	NULL	NULL	NULL	6.22	2.26	5.63	137	18.4	710.5	6.87
77	female	153cm	43Kg	69cm	86cm	0.80	141mmHg	64mmHg	4.91	4.77	142	29.8	91.2	289	14	14	44.9	4.68	1.95	3.45	1.13	6.2	5.6	67	3.3	303	115.06	NULL	0.8	NULL	NULL	NULL	2.53	2.24	6.49	105.1	17.21	20.43	14.75
65	female	162cm	59Kg	74cm	90cm	0.82	114mmHg	65mmHg	5.22	5.39	171	31.7	93.7	196	60	29	43.2	4.15	0.84	2.69	1.13	4.45	5.6	46	3.5	200	107.13	NULL	0.56	NULL	NULL	NULL	3.03	1.53	4.35	79.9	13.2	19.19	8.52
60	female	161cm	65Kg	79cm	91cm	0.87	125mmHg	72mmHg	8.43	5.21	150	28.8	88.9	140	11	18	44.8	2.85	1.12	4.05	1.13	5.66	NULL	75	3.1	401	73.83	NULL	0.89	NULL	NULL	NULL	3.16	1.82	4.75	101.7	14.95	562.6	10.88
69	female	NULL	NULL	NULL	NULL	NULL	NULL	NULL	6.1	4.47	140	31.3	94.9	283	45	28	50.6	5.53	1.12	3.06	0.59	5.72	5	43	6.2	258	NULL	NULL	0.57	NULL	NULL	NULL	0.666	1.59	4.37	85.52	13.77	NULL	17.38
79	female	152cm	45Kg	68cm	85cm	0.80	102mmHg	55mmHg	3.72	4.16	131	31.5	98.1	217	17	28	46.6	5.01	1.61	1.37	1.03	5.23	5.2	58	3.7	267	117.49	NULL	0.73	NULL	NULL	NULL	1.61	1.39	4.01	81.59	17.02	<10.00	180.3
81	female	149cm	63Kg	88cm	100cm	0.88	122mmHg	68mmHg	5.64	5.69	161	28.3	87.7	240	25	25	53.8	7.01	1.62	1.9	0.95	7.19	5.4	78	5.6	401	NULL	NULL	0.9	NULL	NULL	NULL	1.24	1.73	4.7	92.3	15.72	13.93	12.39
72	female	NULL	NULL	NULL	NULL	NULL	NULL	NULL	6.97	4.47	130	29.1	89.7	326	15	15	48.7	4.7	0.89	NULL	0.63	NULL	5.2	58	4.6	259	120.84	NULL	0.67	NULL	NULL	NULL	1.82	1.85	5.11	109.8	16.39	18.32	204.8
62	female	150cm	42Kg	63cm	83cm	0.76	92mmHg	52mmHg	4.73	4.68	134	28.6	89.7	191	8	15	43	4.11	1.51	3.06	0.99	4.29	4.8	58	4.3	264	126.04	NULL	0.68	NULL	NULL	NULL	0.928	1.95	4.51	109	15.4	<10.00	7.68
62	female	154cm	72.4Kg	97cm	104cm	0.93	109mmHg	67mmHg	5.41	5.62	163	29	84.7	167	19	21	52.3	5	1.15	4.12	0.99	8.6	5.1	63	5.9	262	109.43	NULL	0.85	NULL	NULL	NULL	1.96	1.68	4.5	85.5	14.3	<10.00	34.27
80	female	NULL	NULL	NULL	NULL	NULL	NULL	NULL	7.45	4.23	126	29.8	91	292	10	17	46.5	3.23	1.22	4.8	1.05	5.31	5.2	61	4.6	357	116.37	13.9	0.7	NULL	NULL	NULL	1.73	1.85	5.59	94.7	16.4	<10.00	192.6
69	female	154cm	55.2Kg	81cm	92cm	0.88	136mmHg	78mmHg	10.13	4.72	144	30.5	91.5	301	27	23	41.8	3.88	0.98	1.21	0.98	5.55	6	56	5.6	270	NULL	NULL	0.75	NULL	NULL	100	4.46	1.81	5.1	99.08	18.37	<10.00	11.08
63	female	154cm	49Kg	70cm	83cm	0.84	135mmHg	70mmHg	9.01	4.66	136	29.2	90.6	177	10	17	50.5	3.13	1.25	4.03	1.09	4.66	6.1	90	6.8	384	80.82	NULL	1.09	NULL	NULL	NULL	1.4	2.08	5.32	91.18	16.74	<10.00	10.54
68	male	NULL	NULL	NULL	NULL	NULL	NULL	NULL	6.53	5.67	177	31.2	92.4	87	24	27	55.1	8.08	1.32	3	1.11	6.22	NULL	69	5.6	346	NULL	NULL	0.66	NULL	NULL	NULL	1.89	2.08	5.36	110.3	19.17	<10.00	19.57
84	female	154cm	46.2Kg	67cm	88cm	0.76	130mmHg	60mmHg	4.73	5.21	165	31.7	96.5	191	24	31	47.4	4.41	1.12	2.66	1.01	5.78	5.6	62	7	223	113.94	NULL	0.73	NULL	NULL	NULL	1.9	1.96	5.61	98.48	17.75	<10.00	48.76
61	male	NULL	NULL	NULL	NULL	NULL	NULL	NULL	3.21	4.31	132	30.6	96.3	240	10	23	48.8	4.61	2.87	4.42	0.84	5.18	5.6	73	4.1	403	90.93	NULL	0.7	NULL	NULL	NULL	1.63	1.59	3.95	101.4	16.81	<10.00	19.29
81	male	NULL	NULL	NULL	NULL	NULL	NULL	NULL	6	4.86	146	30	91.8	204	17	19	46.8	4.92	1.45	1.18	0.84	4.53	6.2	49	3.8	349	109.44	NULL	0.73	NULL	NULL	NULL	2.52	2.09	4.79	112.4	15.91	12.14	145.4
68	female	158cm	60.8Kg	77cm	94cm	0.82	156mmHg	61mmHg	5.09	4.8	150	31.3	94	306	34	30	50.3	4.7	1.09	3.17	0.99	5.51	NULL	85	5.7	445	88.45	8.9	0.86	NULL	NULL	NULL	2.44	1.57	4.23	81.8	12.8	<10.00	6.91
62	male	NULL	NULL	NULL	NULL	NULL	NULL	NULL	7.03	4.61	145	31.5	97.8	241	11	14	48.8	4.43	2.08	3.4	0.74	4.98	5.6	84	3.8	346	90.36	NULL	0.83	NULL	NULL	NULL	3.33	1.07	4.16	53.6	14.6	<10.00	13.59
82	female	NULL	NULL	NULL	NULL	NULL	NULL	NULL	5.2	5.04	133	26.4	81.2	235	13	13	47.4	4.28	1.44	2.3	0.89	5.08	NULL	95	3.4	339	NULL	18.6	0.8	NULL	NULL	NULL	3.48	1.43	4.67	100.1	19.43	<10.00	7.22
76	male	170cm	84Kg	95cm	108cm	0.88	128mmHg	52mmHg	6.28	5.08	161	31.7	97.4	199	19	19	45.9	5.52	1.52	2	0.89	5.24	5.5	64	5.5	416	NULL	17.7	0.88	NULL	NULL	NULL	1.5	1.51	4.34	87.1	16.84	10.48	9.27
74	male	168cm	70Kg	95cm	96cm	0.99	124mmHg	66mmHg	4.73	3.83	126	32.9	102.6	133	20	24	43.9	4.55	1.16	2.97	0.96	7.91	5.2	56	4.5	291	NULL	NULL	0.65	NULL	NULL	NULL	2.29	1.75	5.07	113.2	19.59	<10.00	16.43
74	female	NULL	NULL	NULL	NULL	NULL	NULL	NULL	4.07	5.32	154	28.9	89.7	191	21	19	46.8	4.77	1.8	4.55	0.55	6.43	5.1	57	5.3	330	NULL	NULL	0.63	NULL	NULL	NULL	3.67	1.45	4.06	81.78	14.62	10.06	<9.00
62	female	155cm	56Kg	80cm	95cm	0.84	133mmHg	67mmHg	5.2	5.21	164	31.5	91.7	128	17	19	47.8	3.49	1.49	2.6	0.55	4.67	5.3	69	6.2	285	100.12	10.6	0.73	NULL	NULL	NULL	1.4	1.44	3.91	98.2	16.6	<10.00	11.11
72	female	158cm	73Kg	105cm	107cm	0.98	149mmHg	69mmHg	6.07	4.67	146	31.3	97.2	226	22	21	46.6	6.27	0.96	3.46	0.54	5.66	5.3	63	5.6	352	NULL	15.4	0.73	NULL	NULL	NULL	1.78	1.65	5.31	83.78	17.04	<10.00	11.04
66	male	178.0cm	89.0Kg	109cm	107cm	1.02	132mmHg	85mmHg	6.04	5.15	164	31.8	95	142	17	16	47.6	4.83	1.38	2.77	0.86	5.26	5.8	82	2.8	465	106.31	17.3	0.75	NULL	NULL	NULL	0.784	2.19	5.34	112.1	18.1	<10.00	6.62
61	female	NULL	NULL	NULL	NULL	NULL	NULL	NULL	2.86	4.8	140	29.2	87.1	126	30	22	50.7	5.4	2.1	3.45	0.82	4.9	5.7	90	5	409	77.49	NULL	0.87	NULL	NULL	NULL	4.54	1.79	4.63	80.2	12.8	12.98	5.68
74	female	151.0cm	56.0Kg	86cm	96cm	0.90	132mmHg	72mmHg	4.56	5.13	116	22.6	78	267	10	14	54.4	4.17	1.67	1.64	0.38	4.74	NULL	57	4.1	326	121.53	10.5	0.73	NULL	NULL	NULL	1.19	1.74	5.29	88.48	15.34	19.65	<9.00
66	female	151cm	44Kg	66cm	84cm	0.79	95mmHg	56mmHg	6.34	5.3	154	29.1	91.9	162	19	16	53.2	5.11	1.86	2.84	0.54	6.22	4.9	71	4.3	200	99.47	13.6	0.69	NULL	NULL	NULL	1.37	1.47	4.32	95	14.4	<10.00	15.11
60	female	159.0cm	51.0Kg	68cm	91cm	0.75	119mmHg	51mmHg	6.29	4.6	140	30.4	90.9	201	16	17	43.8	6.5	1.66	2.31	0.49	5.38	4.8	50	8.3	247	NULL	10.2	0.64	NULL	NULL	NULL	2.85	1.55	4.15	94.36	16.44	<10.00	12.9
62	male	168.0cm	58.0Kg	83cm	92cm	0.90	152mmHg	85mmHg	4.4	4.46	140	31.4	95.1	117	19	21	41.6	5.71	1.72	2.99	0.82	5.9	5.5	53	4.7	257	122.74	15.9	0.62	NULL	NULL	NULL	0.884	0.85	3.59	66.86	13.22	12	15.91
77	male	157cm	55Kg	83cm	93cm	0.89	167mmHg	78mmHg	5.67	5.37	162	30.2	94	267	23	23	48.7	5.44	1.6	1.67	0.49	6.66	4.9	72	5.2	302	101.3	23.1	0.78	NULL	NULL	NULL	3.85	1.7	5.18	118.1	19.56	<10.00	35.29
66	male	167.0cm	68.0Kg	87cm	92cm	0.95	143mmHg	80mmHg	4.7	4.38	140	32	99.3	175	33	22	45.7	4.03	1.15	2.41	0.44	3.97	5.6	47	6.3	198	133.18	15.7	0.6	NULL	NULL	104.8	0.3	1.89	5.11	109.8	18.37	15.1	18.45
63	female	160cm	55Kg	76cm	92cm	0.83	154mmHg	64mmHg	7.85	5.57	169	30.3	93.2	154	11	23	46.3	4.84	0.99	3.17	0.4	5.8	5.3	62	5.4	183	110.01	13	0.68	NULL	NULL	101.9	2.44	1.98	5.63	109	16.9	598	27.73
67	male	NULL	NULL	NULL	NULL	NULL	NULL	NULL	5.82	5.85	171	29.2	89.7	241	35	27	49.1	5.57	1.02	2.67	0.38	5.29	NULL	52	5.4	243	NULL	17.3	0.73	NULL	NULL	NULL	1.79	1.74	5.13	101.3	17.16	<10.00	<9.00
67	female	147cm	51Kg	84cm	90cm	0.93	143mmHg	71mmHg	7.37	6.18	127	20.6	66.8	200	27	22	42.3	4.62	0.93	3.89	0.35	6.26	5.1	69	4.3	272	95.98	9.5	0.63	NULL	NULL	NULL	3.84	1.9	5.19	90.4	16.33	<10.00	<9.00
67	female	NULL	NULL	NULL	NULL	NULL	NULL	NULL	8.13	4.44	121	27.3	86.3	253	11	14	48.1	3.38	1.33	3.98	0.35	4.66	5.2	67	4.9	301	129.65	NULL	0.81	4.71	142.9	NULL	1.88	2.25	6.62	114.6	19.71	12	7.35
83	female	NULL	NULL	NULL	NULL	NULL	NULL	NULL	6.43	4.85	156	32.2	95.5	188	13	20	47.4	5.42	1.07	NULL	0.33	NULL	NULL	40	4.6	242	NULL	NULL	0.58	NULL	NULL	NULL	1.35	2.15	5.3	97.84	17.05	<10.00	12.3
62	male	NULL	NULL	NULL	NULL	NULL	NULL	NULL	3.43	4.59	146	31.8	97.6	180	27	28	51.7	4.16	1.04	3.64	0.35	9.26	5.1	67	5.7	234	99.46	13.6	0.64	NULL	NULL	NULL	0.631	1.6	4.65	85	15.5	10.3	10.2
64	female	NULL	NULL	NULL	NULL	NULL	NULL	NULL	6.24	4.74	152	32.1	96.2	288	24	14	43.7	4.16	1.27	NULL	0.39	NULL	NULL	45	3	210	NULL	NULL	0.59	NULL	NULL	NULL	2.21	1.75	4.7	118.4	18.7	13.49	<9.00
63	female	152cm	60Kg	80cm	97cm	0.82	151mmHg	93mmHg	6.17	4.34	136	31.3	97.9	281	7	16	44.8	4.11	1.45	3.16	4.7	5.39	5.1	93	4	291	93.91	14.3	1.02	NULL	NULL	NULL	3.9	1.79	5.73	107	17.6	220	12
63	female	158cm	51.2Kg	70cm	84cm	0.83	121mmHg	80mmHg	5.89	4.44	139	31.3	90.3	355	56	34	46.5	5.11	1.25	3.76	0.93	5.59	5.7	62	4.2	240	118.01	NULL	0.61	NULL	NULL	NULL	2.59	1.7	4.71	86	14.79	325.1	9.6
61	female	157cm	69.3Kg	90cm	96cm	0.94	151mmHg	79mmHg	4.5	5.99	172	28.7	88.1	197	19	19	49.3	4.08	1.88	3.95	0.85	5.1	NULL	88	4.4	275	NULL	16.1	0.68	NULL	NULL	NULL	2.14	2	5.91	114.9	19.18	30.31	146.6
66	male	161cm	53Kg	74cm	89cm	0.83	143mmHg	76mmHg	4.48	4.64	143	30.8	92.9	309	17	22	46.4	5.61	1.03	2.58	0.86	6.09	5.7	90	4	433	99.78	NULL	0.81	NULL	NULL	NULL	1.61	1.87	5.45	103	18.5	20.2	62.86

## Sheet: Reference range for laboratory 
item	white blood cell count （*10^9/L）	red blood cell count （*10^12/L）		hemoglobin （g/L）		mean erythrocyte content （pg）	mean corpuscular volume （fL）	blood platelet count（*10^9/L）	alanine aminotransferase （U/L)	Aspartate aminotransferase（U/L)	alanine aminotransferase （U/L)	Aspartate aminotransferase（U/L)	albumin（g/L)	cholesterol (mmol/L)	high density lipoprotein (mmol/L)	low density lipoprotein (mmol/L)	triglyceride (mmol/L)	glucose (mmol/L)	glycosylated hemoglobin (%)	urea (mmol/L)	Uric Acid (umol/L)	urea (mmol/L)	Uric Acid (umol/L)	Uric Acid (umol/L)		Estimated glomerular Filtration Rate (ml/min/1.73m^2)	Homocysteine （umol/L）	cystatin C （mg/L）	kalium （mmol/L）	sodium （mmol/L）	chlorinum （mmol/L）	Thyroid stimulating hormone ，TSH（mIU/L）	Triiodothyronine, T3(nmol/L)	Free triiodothyronine，FT3 （pmol/L)	Thyroxine, T4(nmol/L)	Free thyroxine, FT4 （pmol/L)	Antithyroglobulin antibody, TgAb (IU/ml)	Anti-thyroid peroxidase antibody, TPOAb (IU/ml)	Characterization of urine protein	Urinary leukocyte	urine erythrocyte
reference range	3.5-9.5	male：4.3-5.8	female：3.8-5.1	male：130-175	female：115-150	27-34	82-100	100-300	male：＜50	female：＜40	male：＜40	female：＜35	40-55	2.8-5.7	＞0.9	＜4.0	0.29-1.83	3.9-5.9	4.5-6.1	male：68-108	female：48-79	male：3.1-8.0	female：2.6-7.5	male：240-490	female：160-380		＜15.0	0.51-1.09	3.5-5.3	137-147	99-110	0.27-4.2	1.3-3.1	3.6-7.5	62-164	12.0-22.0	＜115	＜34	negative	0-5	0-3
